# Supplementary material
Source: PubMed Central journal article supplement (PMC6407420)
Supplement: NIHMS1009547-supplement-ESI.pdf [file NIHMS1009547-supplement-ESI.pdf]

Supporting Information

**Transcript Profiling of MRSA Biofilms Treated with a Halogenated Phenazine Eradicating Agent: A Platform for Defining Cellular Targets and Pathways Critical to Biofilm Survival**

*Yasmeen Abouelhassan, Yanping Zhang, Shouguang Jin, and Robert W. Huigens III\**

anie\_201809785\_sm\_miscellaneous\_information.pdf

# **Supporting Information**

## Table of Contents

|                                                                                                                            |           |
|----------------------------------------------------------------------------------------------------------------------------|-----------|
| <b>1.) MRSA Gene Symbols &amp; Encoded Proteins.</b>                                                                       | <b>3</b>  |
| <b>2.) Supporting Figures.</b>                                                                                             | <b>4</b>  |
| <i>Supporting Figure 1: WoPPER analysis of 646 gene transcripts (<math>\geq 1.5</math>-fold change from <b>HP-14</b>).</i> | <b>4</b>  |
| <i>Supporting Figure 2: WoPPER analysis of all 2,738 MRSA gene transcripts from <b>HP-14</b> treatment.</i>                | <b>5</b>  |
| <i>Supporting Figure 3: RT-qPCR validation of modulated transcripts from <b>HP-14</b> treatment.</i>                       | <b>6</b>  |
| <i>Supporting Figure 4: Iron acquisition in <i>S. aureus</i> with RNA-seq results from <b>HP-14</b> treatment.</i>         | <b>10</b> |
| <b>3.) Supporting Tables.</b>                                                                                              | <b>11</b> |
| <i>Supporting Table 1: Top 30 upregulated transcripts from <b>HP-14</b> treatment of MRSA biofilms.</i>                    | <b>11</b> |
| <i>Supporting Table 2: Top 30 down-regulated transcripts from <b>HP-14</b> treatment of MRSA biofilms.</i>                 | <b>12</b> |
| <i>Supporting Table 3: Transcripts involved in responses to reactive oxygen species (ROS).</i>                             | <b>13</b> |
| <i>Supporting Table 4: RNA-seq results related to biofilm-relevant genes.</i>                                              | <b>14</b> |
| <i>Supporting Table 5: Primers used for qPCR validation experiments.</i>                                                   | <b>15</b> |
| <i>Supporting Table 6: WoPPER analysis of 10 gene clusters identified from <b>HP-14</b> treatment.</i>                     | <b>16</b> |
| <i>Supporting Table 7: WoPPER analysis of 37 gene clusters identified from <b>HP-14</b> treatment.</i>                     | <b>18</b> |
| <i>Supporting Table 8: KEGG pathway analysis from <b>HP-14</b> treatment of MRSA-1707 biofilms.</i>                        | <b>23</b> |
| <b>4.) Biological Methods.</b>                                                                                             | <b>30</b> |
| <b>5.) References.</b>                                                                                                     | <b>38</b> |

## 1.) MRSA Gene Symbols & Encoded Proteins.

Genes in this section are relevant to our transcript profiling investigations of established MRSA-1707 (MRSA BAA-1707, purchased from ATCC) biofilms treated with **HP-14**. The genes/symbols below were either used to validate RNA-seq findings (in qPCR experiments), or critical references to our mechanistic understandings of **HP-14**.

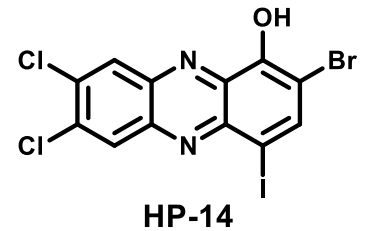

### a) Genes Related to Iron Acquisition (with qPCR data reported):

**isdB**: iron-regulated surface determinant, mediates heme uptake (*J. Bacteriol.* **2006**, *188*, 8421-8429.)

**sbnC**: staphyloferrin B (siderophore) synthetase enzyme (*J. Biol. Chem.* **2016**, *291*, 29-40.)

**sfaA**: staphyloferrin A (siderophore) efflux transporter (*Infect. Immun.* **2017**, *85*, e00358-17.)

**MW0695**: hypothetical protein, similar to ferrichrome ABC transporters (ref. DOGAN, a genome database of microorganisms sequenced at NITE <http://www.bio.nite.go.jp/dogan/top>.)

**fhuDI**: ferric hydroxamate-binding lipoprotein (*J. Biol. Chem.* **2004**, *279*, 53152-53159.)

### b) Gene Acronyms Related to Iron Acquisition (from WoPPER analysis; no qPCR data reported):

**sir**: staphylococcal iron regulated transporter (*Annu. Rev. Microbiol.* **2011**, *65*, 129-147.)

**hts**: heme transport system (*Annu. Rev. Microbiol.* **2011**, *65*, 129-147.)

### c) Genes Not Related to Iron Acquisition (with qPCR data reported):

**oppF**: membrane-bound cytoplasmic ATP-binding protein; provides energy for peptide transport (*J. Bacteriol.* **2007**, *189*, 5119-5129.)

**splB**: serine protease; catalyzes the breakdown of proteins into peptides and amino acids (*J. Biol. Chem.* **2014**, *289*, 15544-15553.)

**gap**: glyceraldehyde-3-phosphate dehydrogenase; enzyme involved in glycolysis/ATP production (*J. Clin. Microbiol.* **2000**, *38*, 4351-4355.)

**arcD**: arginine/ornithine antiporter (*Nat. Comm.* **2017**, *8*, 14268.; *J. Bacteriol.* **2007**, *189*, 5976-5986.)

**dnaC**: DNA helicase required for elongation during DNA synthesis; involved in DNA repair (*FEMS Microbiol. Lett.* **2002**, *210*, 157-164.)

**ureC**: urease alpha subunit; virulence factor, essential in colonization of host organism & maintenance of bacterial populations in tissues (*Curr. Protein Pept. Sci.* **2012**, *13*, 789-806.)

**hemL**: glutamate-1-semialdehyde 2,1-aminomutase; early gene of tetrapyrrole synthesis (heme biosynthesis; *Microbiol. Mol. Biol. Rev.* **2017**, *81*, e00048-16.; *Front. Microbiol.* **2017**, *8*, 1354.)

## 2.) Supporting Figures.

A)

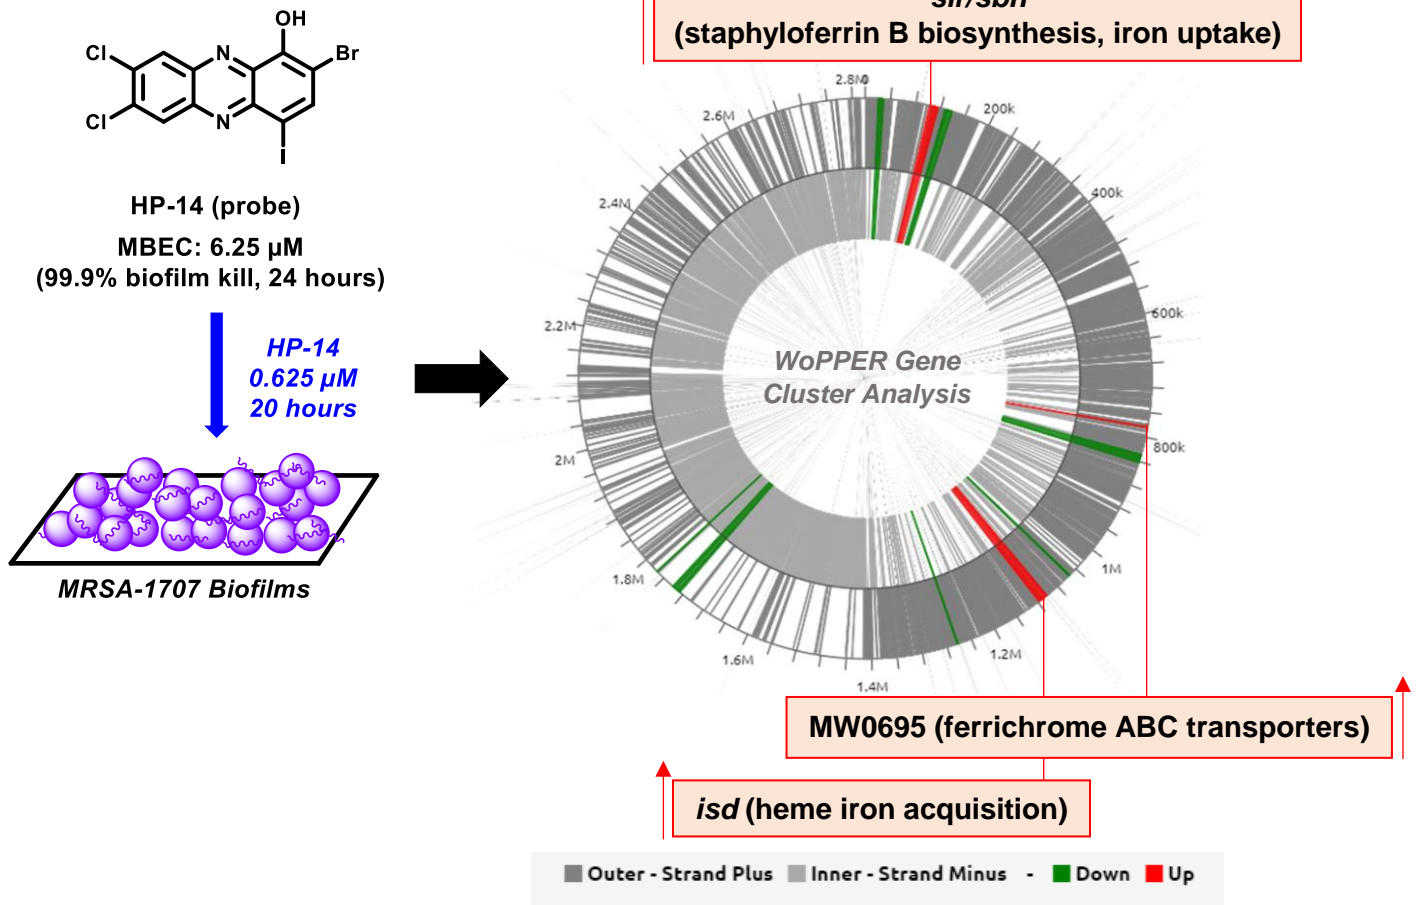

B)

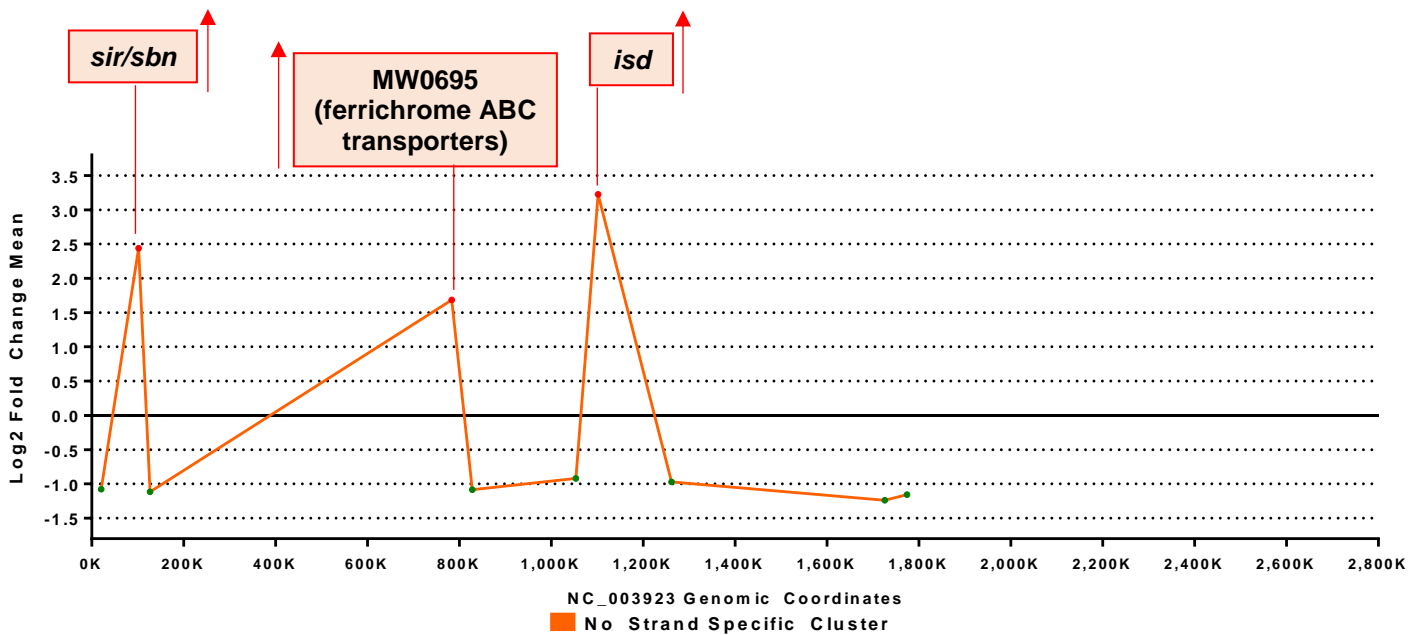

**Supporting Figure 1:** (A) Circular and (B) linear presentations of the 10 gene clusters identified from our initial WoPPER analysis that focused on the evaluation of the 646 genes that demonstrated  $\geq 1.5$ -fold change in gene expression upon **HP-14** (0.625  $\mu$ M, 1/10 MBEC for 20 hours) treatment of MRSA-1707 biofilms.

A)

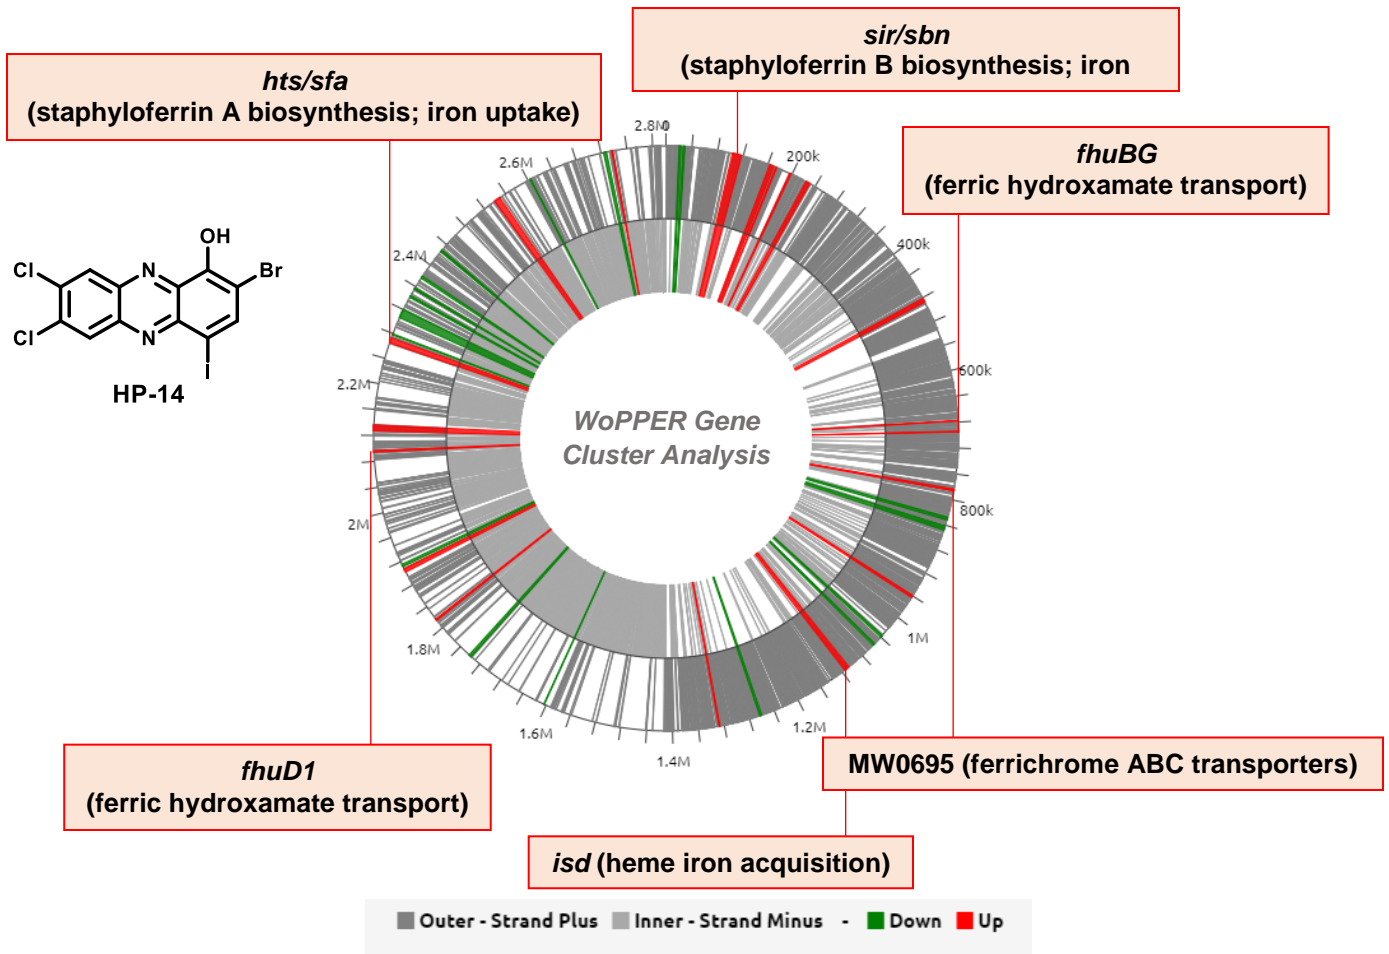

B)

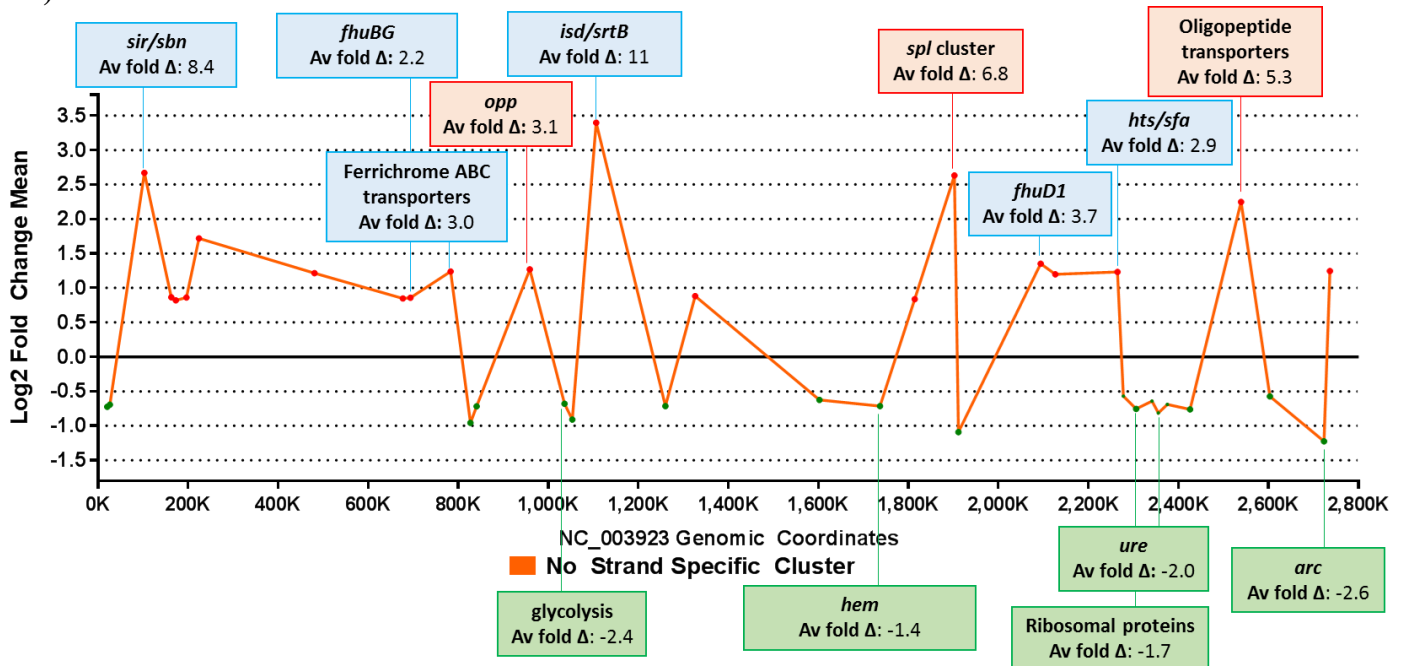

**Supporting Figure 2:** (A) Circular and (B) linear presentations of 37 gene clusters identified from WoPPER analysis when analyzing all 2,738 MRSA-1707 biofilm genes following treatment with **HP-14** (0.625  $\mu$ M, 1/10 MBEC). This WoPPER analysis was performed to avoid missing any important gene cluster involvement (Supp. Fig. 1), which provided several key insights during these investigations.

**Supporting Figure 3:** Time course RT-qPCR validation of MRSA-1707 biofilm transcripts up-regulated & down-regulated upon treatment with **HP-14** (0.625  $\mu$ M) at (A) 1 hour, (B) 4 hours, (C) 8 hours and (D) 20 hours (next few pages). EDTA and TPEN were tested at 5  $\mu$ M. \* P-value  $\leq$  0.05, \*\* P-value  $\leq$  0.01

**A) 1 hour time point** (note the rapid activation of *isdB*, *sbnC*, *sfaA* & MW0695 in MRSA-1707 biofilms upon **HP-14** treatment)

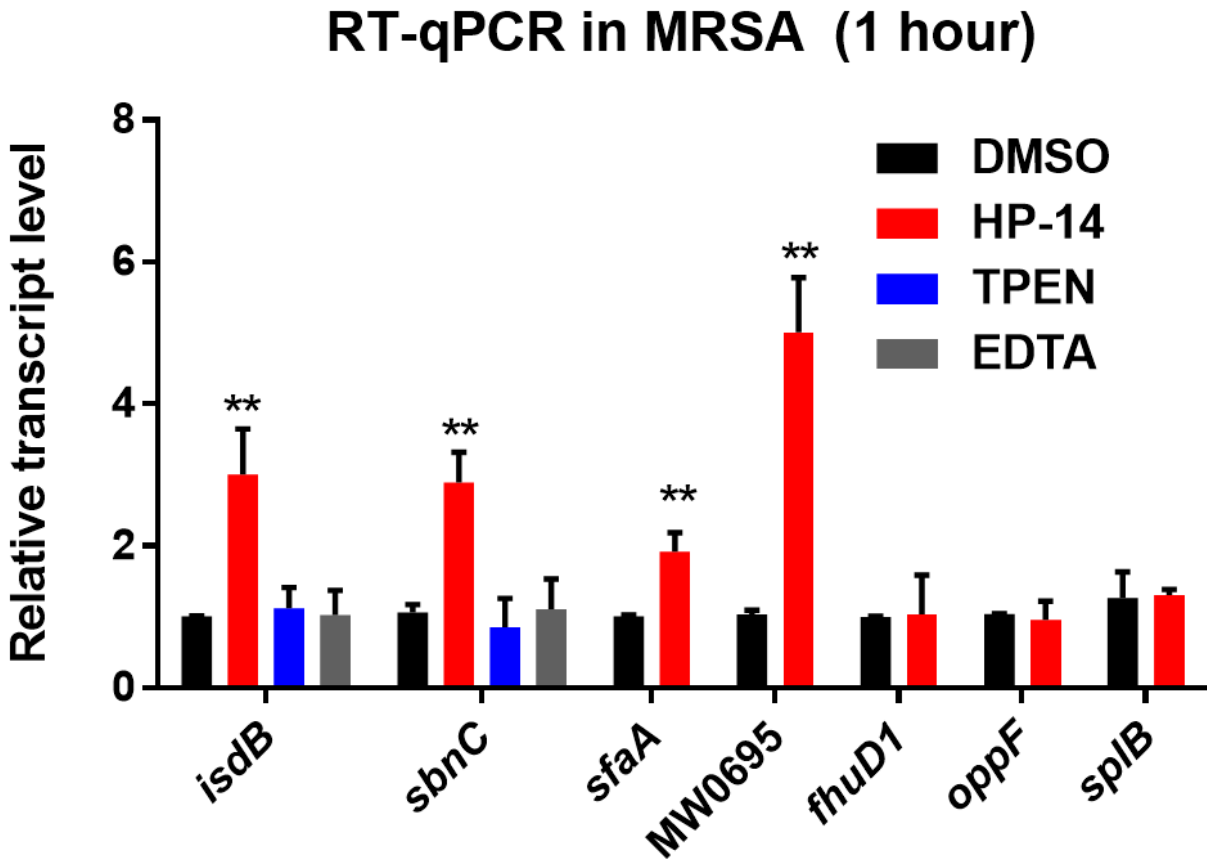

| Gene         | DMSO            | HP-14           | TPEN            | EDTA            | Gene Information / Function                                   |
|--------------|-----------------|-----------------|-----------------|-----------------|---------------------------------------------------------------|
|              | Mean $\pm$ SD   | Mean $\pm$ SD   | Mean $\pm$ SD   | Mean $\pm$ SD   |                                                               |
| <i>isdB</i>  | 1.0 $\pm$ 0.004 | 3.0 $\pm$ 0.640 | 1.1 $\pm$ 0.298 | 1.0 $\pm$ 0.346 | hemoglobin receptor required for heme iron utilization        |
| <i>sbnC</i>  | 1.1 $\pm$ 0.110 | 2.9 $\pm$ 0.423 | 0.9 $\pm$ 0.406 | 1.1 $\pm$ 0.429 | staphyloferrin B (siderophore) biosynthesis; iron acquisition |
| <i>sfaA</i>  | 1.0 $\pm$ 0.017 | 1.9 $\pm$ 0.271 | --              | --              | staphyloferrin A (siderophore) efflux; iron acquisition       |
| MW0695       | 1.0 $\pm$ 0.055 | 5.0 $\pm$ 0.774 | --              | --              | hypo. protein, similar to ferrichrome ABC transporters        |
| <i>fhuD1</i> | 1.0 $\pm$ 0.006 | 1.0 $\pm$ 0.550 | --              | --              | utilize ferric hydroxamates as a source of iron               |
| <i>oppF</i>  | 1.0 $\pm$ 0.006 | 1.0 $\pm$ 0.260 | --              | --              | provides energy for peptide transport; bacterial nutrition    |
| <i>splB</i>  | 1.3 $\pm$ 0.369 | 1.3 $\pm$ 0.079 | --              | --              | serine protease; proteolysis (breakdown of proteins)          |

Supporting Figure 3 (continued)

B) 4 hour time point

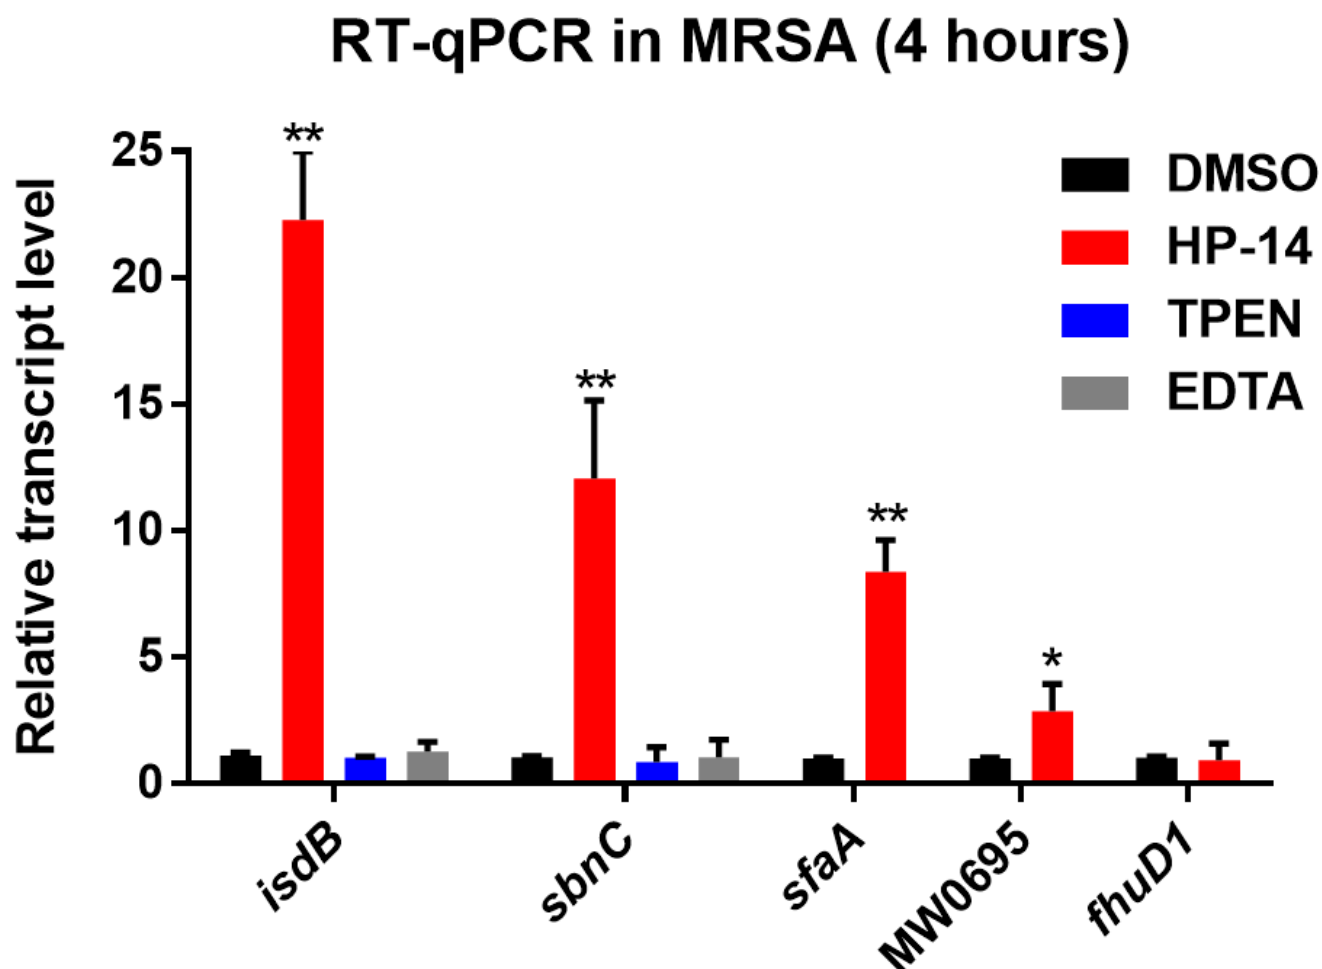

| Gene          | DMSO        | HP-14       | TPEN        | EDTA        | Gene Information / Function                                   |
|---------------|-------------|-------------|-------------|-------------|---------------------------------------------------------------|
|               | Mean ± SD   | Mean ± SD   | Mean ± SD   | Mean ± SD   |                                                               |
| <i>isdB</i>   | 1.1 ± 0.137 | 22.3 ± 2.70 | 1.0 ± 0.050 | 1.3 ± 0.382 | hemoglobin receptor required for heme iron utilization        |
| <i>sbnC</i>   | 1.0 ± 0.052 | 12.1 ± 3.07 | 0.9 ± 0.585 | 1.1 ± 0.681 | staphyloferrin B (siderophore) biosynthesis; iron acquisition |
| <i>sfaA</i>   | 1.0 ± 0.021 | 8.4 ± 1.25  | --          | --          | staphyloferrin A (siderophore) efflux; iron acquisition       |
| <i>MW0695</i> | 1.0 ± 0.012 | 2.9 ± 1.09  | --          | --          | hypo. protein, similar to ferrichrome ABC transporters        |
| <i>fhuD1</i>  | 1.0 ± 0.031 | 0.9 ± 0.68  | --          | --          | utilize ferric hydroxamates as a source of iron               |

\* P-value ≤ 0.05, \*\* P-value ≤ 0.01



Supporting Figure 3 (continued)

C) 8 hour time point

RT-qPCR (MRSA Biofilms; 8 hours)

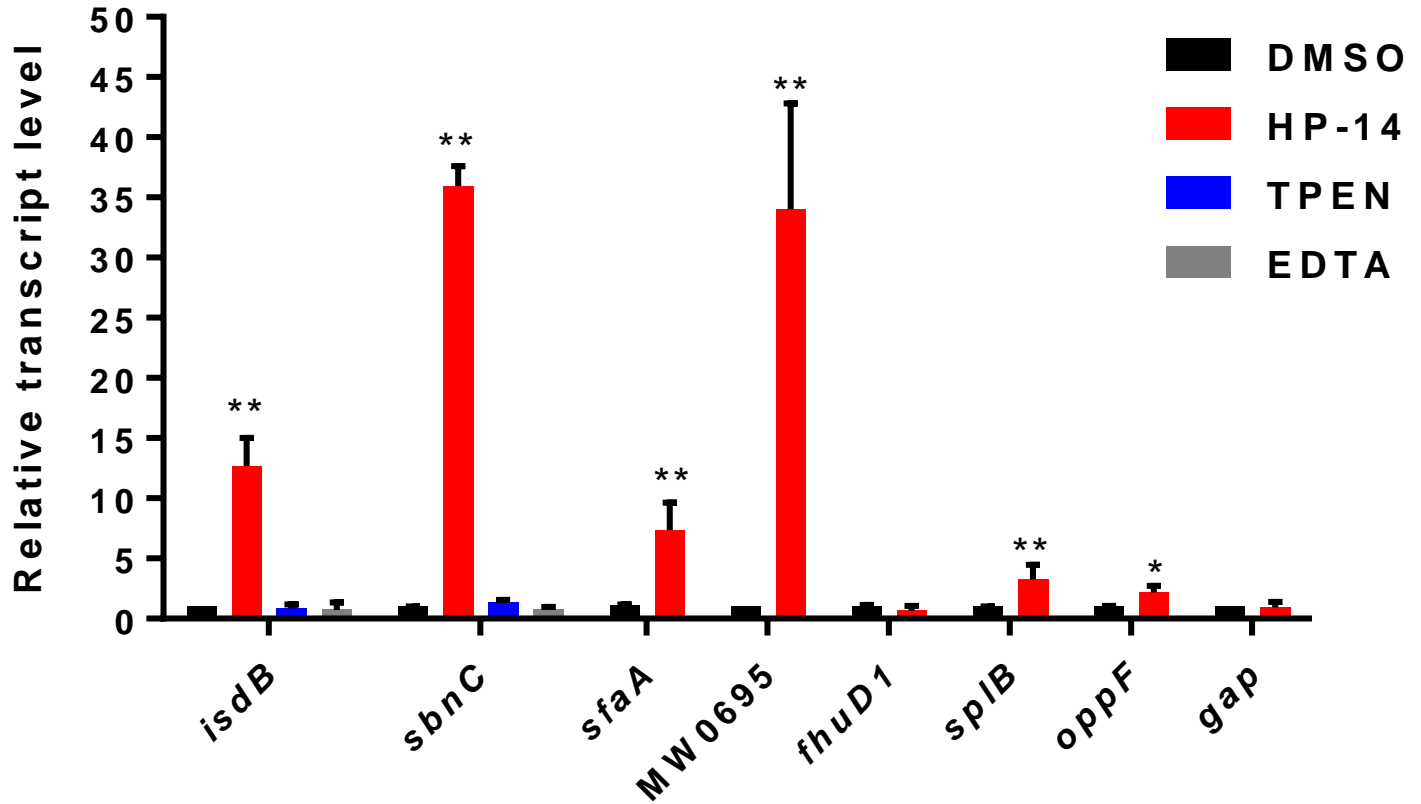

| Gene          | DMSO        | HP-14       | TPEN        | EDTA        | Gene Information / Function                                   |
|---------------|-------------|-------------|-------------|-------------|---------------------------------------------------------------|
|               | Mean ± SD   | Mean ± SD   | Mean ± SD   | Mean ± SD   |                                                               |
| <i>isdB</i>   | 1.0 ± 0.010 | 12.7 ± 2.35 | 0.9 ± 0.311 | 0.8 ± 0.606 | hemoglobin receptor required for heme iron utilization        |
| <i>sbnC</i>   | 1.0 ± 0.012 | 36.0 ± 1.68 | 1.3 ± 0.269 | 0.8 ± 0.219 | staphyloferrin B (siderophore) biosynthesis; iron acquisition |
| <i>sfaA</i>   | 1.1 ± 0.079 | 7.4 ± 2.30  | --          | --          | staphyloferrin A (siderophore) efflux; iron acquisition       |
| <i>MW0695</i> | 1.0 ± 0.015 | 34.0 ± 8.78 | --          | --          | hypo. protein, similar to ferrichrome ABC transporters        |
| <i>fhuD1</i>  | 1.1 ± 0.084 | 0.6 ± 0.41  | --          | --          | utilize ferric hydroxamates as a source of iron               |
| <i>splB</i>   | 1.0 ± 0.018 | 3.3 ± 1.20  | --          | --          | serine protease; proteolysis (breakdown of proteins)          |
| <i>oppF</i>   | 1.0 ± 0.031 | 2.2 ± 0.57  | --          | --          | provides energy for peptide transport; bacterial nutrition    |
| <i>gap</i>    | 1.0 ± 0.012 | 0.9 ± 0.47  | --          | --          | glyceraldehyde-3-phosphate dehydrogenase; glycolysis          |

\* P-value ≤ 0.05, \*\* P-value ≤ 0.01

Supporting Figure 3 (continued)

D) 20 hour time point

### RT-qPCR in MRSA (20 hour)

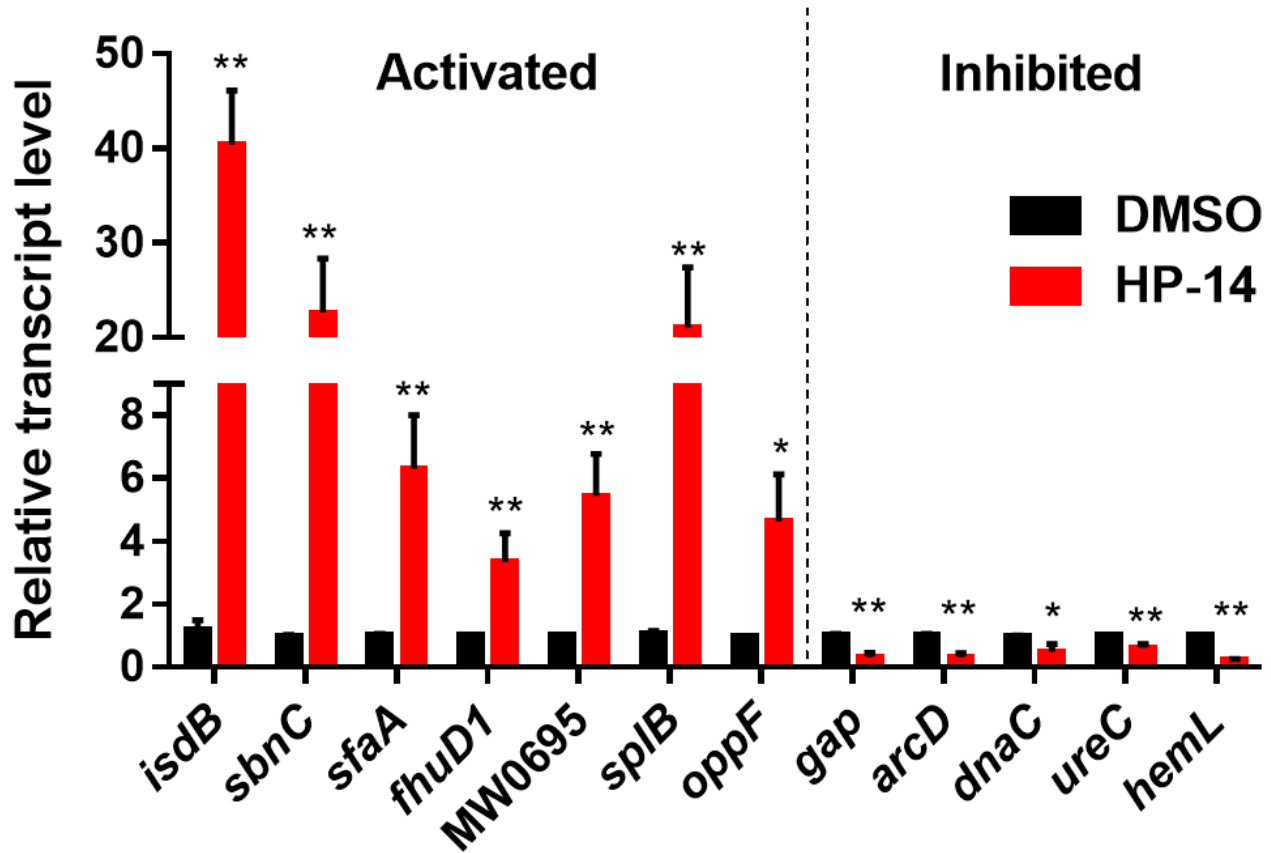

| Gene          | DMSO        | HP-14       | Gene Information / Function                                                          |
|---------------|-------------|-------------|--------------------------------------------------------------------------------------|
|               | Mean ± SD   | Mean ± SD   |                                                                                      |
| <i>isdB</i>   | 1.2 ± 0.298 | 40.4 ± 5.70 | hemoglobin receptor required for heme iron utilization                               |
| <i>sbnC</i>   | 1.0 ± 0.010 | 22.7 ± 5.71 | staphyloferrin B (siderophore) biosynthesis; iron acquisition                        |
| <i>sfaA</i>   | 1.0 ± 0.035 | 6.3 ± 1.70  | staphyloferrin A (siderophore) efflux; iron acquisition                              |
| <i>MW0695</i> | 1.0 ± 0.025 | 5.4 ± 1.34  | hypothetical protein, similar to ferrichrome ABC transporters                        |
| <i>fhuD1</i>  | 1.0 ± 0.023 | 3.3 ± 0.92  | utilize ferric hydroxamates as a source of iron                                      |
| <i>spIB</i>   | 1.1 ± 0.077 | 21.1 ± 6.34 | serine protease; proteolysis (breakdown of proteins into polypeptides & amino acids) |
| <i>oppF</i>   | 1.0 ± 0.006 | 4.6 ± 1.49  | provides energy for peptide transport; bacterial nutrition                           |
| <i>gap</i>    | 1.0 ± 0.040 | 0.32 ± 0.14 | glyceraldehyde-3-phosphate dehydrogenase; enzyme involved in glycolysis              |
| <i>arcD</i>   | 1.0 ± 0.031 | 0.31 ± 0.14 | arginine/ornithine antiporter                                                        |
| <i>dnaC</i>   | 1.0 ± 0.012 | 0.49 ± 0.25 | DNA helicase required for elongation during DNA synthesis; involved in DNA repair    |
| <i>ureC</i>   | 1.0 ± 0.016 | 0.63 ± 0.12 | urease alpha subunit; virulence factor                                               |
| <i>hemL</i>   | 1.0 ± 0.012 | 0.25 ± 0.02 | glutamate-1-semialdehyde 2,1-aminomutase; heme biosynthesis                          |

\* P-value ≤ 0.05, \*\* P-value ≤ 0.01

| Gene        | Fold $\Delta$ |
|-------------|---------------|
| <i>isdB</i> | 10.73         |
| <i>isdA</i> | 10.37         |
| <i>isdC</i> | 14.09         |
| <i>isdD</i> | 14.13         |
| <i>isdE</i> | 12.08         |
| <i>isdF</i> | 10.45         |
| <i>srtB</i> | 17.39         |
| <i>isdG</i> | 10.41         |
| <i>isdH</i> | 3.78          |
| <i>orfX</i> | 1.94          |
| <i>isdI</i> | 1.14          |
| <i>sirB</i> | 4.30          |
| <i>sirA</i> | 8.63          |
| <i>sirC</i> | 1.31          |
| <i>sbnA</i> | 12.43         |
| <i>sbnB</i> | 15.13         |
| <i>sbnC</i> | 16.02         |

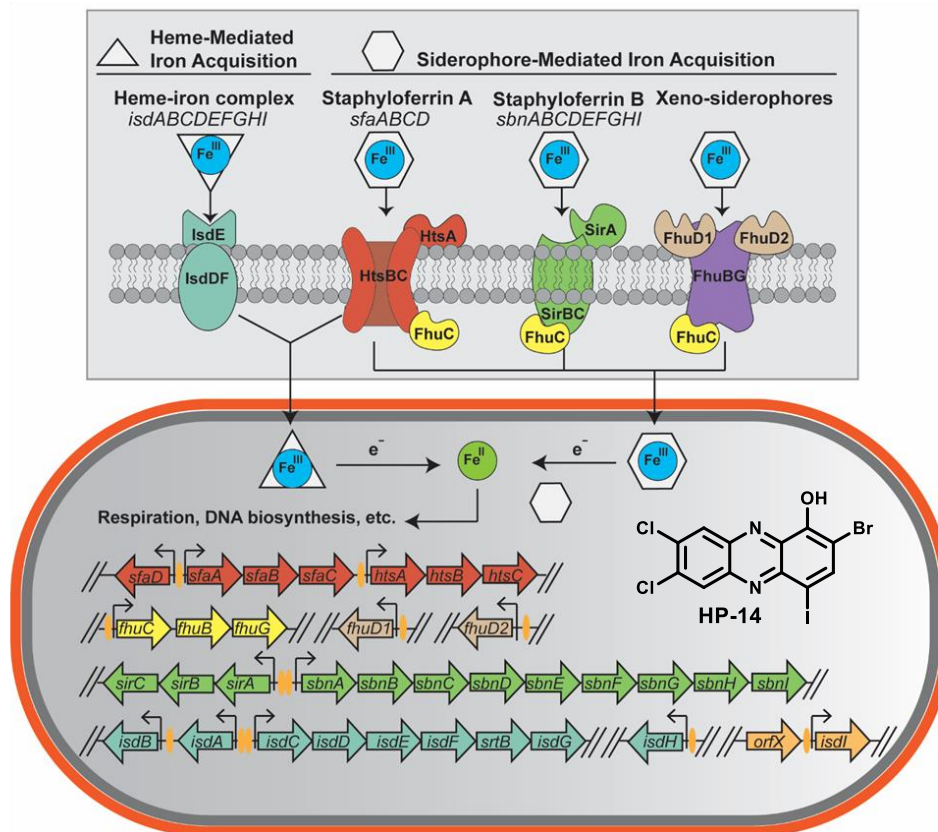

| Gene         | Fold $\Delta$ |
|--------------|---------------|
| <i>sbnD</i>  | 14.11         |
| <i>sbnE</i>  | 9.15          |
| <i>sbnF</i>  | 8.37          |
| <i>sbnG</i>  | 6.38          |
| <i>sbnH</i>  | 6.16          |
| <i>sbnI</i>  | 5.55          |
| <i>fhuC</i>  | 2.61          |
| <i>fhuB</i>  | 2.32          |
| <i>fhuG</i>  | 1.99          |
| <i>fhuD1</i> | 5.03          |
| <i>fhuD2</i> | 2.52          |
| <i>sfaD</i>  | 1.60          |
| <i>sfaA</i>  | 4.58          |
| <i>sfaB</i>  | 1.55          |
| <i>sfaC</i>  | 1.61          |
| <i>htsA</i>  | 3.85          |
| <i>htsB</i>  | 3.84          |

**Supporting Figure 4:** Iron acquisition systems in *S. aureus* with corresponding fold changes of MRSA-1707 biofilm gene transcripts (activated) following treatment with **HP-14** (0.625  $\mu$ M, 1/10 MBEC) for 20 hours.

### 3.) Supporting Tables.

**Supporting Table 1:** Top 30 upregulated gene transcripts from RNA-seq of MRSA-1707 biofilms upon treatment with **HP-14** (20 hours at 0.625  $\mu$ M).

|    | Gene   | Symbol      | Product                                                               | Fold $\Delta$ | P-value                |
|----|--------|-------------|-----------------------------------------------------------------------|---------------|------------------------|
| 1  | MW1017 | <i>srtB</i> | NPQTN specific sortase B                                              | 17.4          | $2.9 \times 10^{-137}$ |
| 2  | MW0091 | <i>sbnC</i> | Staphyloferrin B (siderophore) biosynthesis protein SbnC              | 16.0          | $4.8 \times 10^{-171}$ |
| 3  | MW0090 | <i>sbnB</i> | Putative ornithine cyclodeaminase (staphyloferrin B)                  | 15.1          | $2.3 \times 10^{-116}$ |
| 4  | MW1014 | <i>isdD</i> | Conserved hypothetical protein (iron-regulated surface determinant)   | 14.1          | $9.9 \times 10^{-122}$ |
| 5  | MW0092 | <i>sbnD</i> | Hypothetical efflux protein (staphyloferrin B)                        | 14.1          | $6.0 \times 10^{-151}$ |
| 6  | MW1013 | <i>isdC</i> | Conserved hypothetical protein (iron-regulated surface determinant)   | 14.1          | $4.4 \times 10^{-131}$ |
| 7  | MW1754 | <i>splB</i> | Serine protease SplB [Genomic island nu Sa beta2]                     | 13.7          | $2.9 \times 10^{-107}$ |
| 8  | MW0089 | <i>sbnA</i> | Hypothetical protein; similar to cysteine synthase (staphyloferrin B) | 12.4          | $5.7 \times 10^{-119}$ |
| 9  | MW1015 | <i>isdE</i> | Hypothetical protein; similar to ferrichrome ABC transporter          | 12.1          | $2.0 \times 10^{-123}$ |
| 10 | MW1755 | <i>splA</i> | Serine protease SplA [Genomic island nu Sa beta2]                     | 10.9          | $1.6 \times 10^{-111}$ |
| 11 | MW1011 | <i>isdB</i> | Conserved hypothetical protein (iron-regulated surface determinant)   | 10.7          | $4.5 \times 10^{-170}$ |
| 12 | MW1016 | <i>isdF</i> | Hypothetical protein; similar to ferrichrome ABC transporter          | 10.5          | $1.4 \times 10^{-120}$ |
| 13 | MW1018 | <i>isdG</i> | Conserved hypothetical protein (iron-regulated surface determinant)   | 10.4          | $4.0 \times 10^{-64}$  |
| 14 | MW1012 | <i>isdA</i> | Cell surface protein (iron-regulated surface determinant)             | 10.4          | $2.3 \times 10^{-121}$ |
| 15 | MW1753 | <i>splC</i> | Serine protease SplC [Genomic island nu Sa beta2]                     | 9.6           | $1.3 \times 10^{-129}$ |
| 16 | MW0093 | <i>sbnE</i> | Staphyloferrin B (siderophore) biosynthesis protein SbnE              | 9.2           | $3.3 \times 10^{-130}$ |
| 17 | MW0088 | <i>sirA</i> | Iron-regulated ABC transporter siderophore-binding protein SirA       | 8.6           | $6.4 \times 10^{-156}$ |
| 18 | MW0094 | <i>sbnF</i> | Staphyloferrin B (siderophore) biosynthesis protein SbnF              | 8.4           | $3.1 \times 10^{-125}$ |
| 19 | MW2389 | n.a.        | Oligopeptide transporter putative membrane permease domain            | 7.8           | $8.1 \times 10^{-126}$ |
| 20 | MW2388 | n.a.        | Oligopeptide transporter putative ATPase domain                       | 7.5           | $3.6 \times 10^{-119}$ |
| 21 | MW1752 | <i>splF</i> | Serine protease SplF [Genomic island nu Sa beta2]                     | 7.4           | $3.4 \times 10^{-131}$ |
| 22 | MW2393 | n.a.        | Conserved hypothetical protein                                        | 6.8           | $3.0 \times 10^{-78}$  |
| 23 | MW2392 | n.a.        | Conserved hypothetical protein                                        | 6.7           | $1.7 \times 10^{-73}$  |
| 24 | MW0095 | <i>sbnG</i> | Putative 2-dehydro-3-deoxyglucarate aldolase (staphyloferrin B)       | 6.4           | $8.0 \times 10^{-96}$  |
| 25 | MW0096 | <i>sbnH</i> | Putative diaminopimelate decarboxylase (staphyloferrin B)             | 6.2           | $4.1 \times 10^{-102}$ |
| 26 | MW0194 | n.a.        | Hypothetical protein; similar to NADH-dependent dehydrogenase         | 5.7           | $1.9 \times 10^{-89}$  |
| 27 | MW0195 | n.a.        | Conserved hypothetical protein                                        | 5.6           | $2.0 \times 10^{-84}$  |
| 28 | MW0097 | <i>sbnI</i> | Hypothetical protein (staphyloferrin B)                               | 5.6           | $1.4 \times 10^{-86}$  |
| 29 | MW2387 | n.a.        | Oligopeptide transporter putative ATPase domain                       | 5.5           | $3.9 \times 10^{-101}$ |
| 30 | MW2394 | n.a.        | Hypothetical protein; similar to diaminopimelate epimerase            | 5.3           | $1.4 \times 10^{-62}$  |

**Note:** All corresponding gene names and symbols were retrieved from DOGAN, a genome database of microorganisms sequenced at NITE (<http://www.bio.nite.go.jp/dogan/top>).

**Supporting Table 2:** Top 30 down-regulated gene transcripts from RNA-seq of MRSA-1707 biofilms upon treatment with **HP-14** (20 hours at 0.625  $\mu$ M).

|    | Gene       | Symbol                   | Product                                                                            | Fold $\Delta$ | P-value                 |
|----|------------|--------------------------|------------------------------------------------------------------------------------|---------------|-------------------------|
| 1  | MW2281     | n.a.                     | Conserved hypothetical protein                                                     | -4.5          | 1.4 x 10 <sup>-84</sup> |
| 2  | MW2280     | n.a.                     | Hypothetical protein; similar to ABC transporter and ATP-binding protein           | -4.3          | 6.9 x 10 <sup>-99</sup> |
| 3  | MW_RS08680 | n.a.                     | Hypothetical protein <sup>a</sup>                                                  | -3.8          | 1.9 x 10 <sup>-24</sup> |
| 4  | MW0734     | <i>gap</i>               | Glyceraldehyde-3-phosphate dehydrogenase                                           | -3.7          | 8.4 x 10 <sup>-64</sup> |
| 5  | MW1834     | n.a.                     | Hypothetical protein; similar to ferritin                                          | -3.7          | 3.0 x 10 <sup>-62</sup> |
| 6  | MW2554     | <i>arcD</i>              | Arginine/ornithine antiporter                                                      | -3.6          | 1.6 x 10 <sup>-25</sup> |
| 7  | MW1762     | <i>basD</i> <sup>b</sup> | Hypothetical protein; similar to lantibiotic epidermin biosynthesis protein EpiD   | -3.3          | 2.4 x 10 <sup>-29</sup> |
| 8  | MW0100     | <i>butA</i>              | Acetoin(diacetyl)reductase                                                         | -3.0          | 1.5 x 10 <sup>-30</sup> |
| 9  | MW1625     | <i>lysP</i>              | Lysine-specific permease                                                           | -3.0          | 5.6 x 10 <sup>-29</sup> |
| 10 | MW2552     | n.a.                     | Hypothetical protein; similar to transcription regulator Crp/Fnr family protein    | -3.0          | 2.0 x 10 <sup>-18</sup> |
| 11 | MW0958     | n.a.                     | Conserved hypothetical protein                                                     | -2.9          | 1.4 x 10 <sup>-38</sup> |
| 12 | MW2578     | n.a.                     | Hypothetical protein                                                               | -2.9          | 1.7 x 10 <sup>-32</sup> |
| 13 | MW2553     | <i>arc</i>               | Carbamate kinase                                                                   | -2.9          | 1.5 x 10 <sup>-17</sup> |
| 14 | MW0108     | n.a.                     | Hypothetical protein                                                               | -2.8          | 2.6 x 10 <sup>-43</sup> |
| 15 | MW1226     | <i>lexA</i>              | SOS regulatory LexA protein                                                        | -2.8          | 2.5 x 10 <sup>-23</sup> |
| 16 | MW1152     | <i>infB</i>              | Translation initiation factor IF-2                                                 | -2.8          | 1.2 x 10 <sup>-32</sup> |
| 17 | MW1641     | <i>pykA</i>              | Pyruvate kinase                                                                    | -2.8          | 6.3 x 10 <sup>-43</sup> |
| 18 | MW1763     | <i>basC</i> <sup>b</sup> | Hypothetical protein; similar to lantibiotic epidermin biosynthesis protein EpiC2  | -2.7          | 1.2 x 10 <sup>-26</sup> |
| 19 | MW2622     | n.a.                     | Hypothetical protein                                                               | -2.6          | 1.3 x 10 <sup>-2</sup>  |
| 20 | MW1611     | <i>hemL</i>              | Glutamate-1-semialdehyde 2,1-aminomutase                                           | -2.6          | 7.1 x 10 <sup>-23</sup> |
| 21 | MW0738     | <i>eno</i>               | Enolase (2-phosphoglycerate dehydrogenase)                                         | -2.6          | 5.1 x 10 <sup>-34</sup> |
| 22 | MW1435     | n.a.                     | Hypothetical protein; similar to Cro-like protein ( <i>Strep. pyogenes</i> M1 GAS) | -2.5          | 1.6 x 10 <sup>-23</sup> |
| 23 | MW1612     | <i>hemB</i>              | Delta-aminolevulinic acid dehydratase                                              | -2.5          | 2.5 x 10 <sup>-22</sup> |
| 24 | MW1468     | <i>bmfBB</i>             | Branched-chain alpha-keto acid dehydrogenase E2                                    | -2.5          | 1.8 x 10 <sup>-21</sup> |
| 25 | MW0774     | n.a.                     | Hypothetical protein                                                               | -2.5          | 1.7 x 10 <sup>-28</sup> |
| 26 | MW1680     | n.a.                     | Chorismate mutase homologue                                                        | -2.4          | 7.9 x 10 <sup>-23</sup> |
| 27 | MW0016     | <i>dnaC</i>              | Replicative DNA helicase                                                           | -2.4          | 5.2 x 10 <sup>-20</sup> |
| 28 | MW1642     | <i>pfk</i>               | 6-Phosphofructokinase                                                              | -2.4          | 3.7 x 10 <sup>-30</sup> |
| 29 | MW2330     | n.a.                     | Conserved hypothetical protein                                                     | -2.4          | 2.1 x 10 <sup>-30</sup> |
| 30 | MW1250     | n.a.                     | 4-Oxalocrotonate tautomerase                                                       | -2.4          | 3.3 x 10 <sup>-21</sup> |

**Notes:** All corresponding gene names and symbols were retrieved from DOGAN, a genome database of microorganisms sequenced at NITE (<http://www.bio.nite.go.jp/dogan/top>) unless otherwise noted. <sup>a</sup> Information retrieved from ATGC, Alignable Tight Genomic Cluster: ATGC052 ([ftp://dmk-brain.ecn.uiowa.edu/ATGC/data/ATGC052/genomes/Staphylococcus\\_aureus\\_aureus\\_MW2.GCF\\_000011265.1.html](ftp://dmk-brain.ecn.uiowa.edu/ATGC/data/ATGC052/genomes/Staphylococcus_aureus_aureus_MW2.GCF_000011265.1.html)). <sup>b</sup> Information retrieved from KEGG GENOME Database ([http://www.genome.jp/kegg-bin/show\\_organism](http://www.genome.jp/kegg-bin/show_organism)).

**Supporting Table 3:** Genes involved in responses to reactive oxygen species (ROS) from MRSA-1707 biofilms treated with **HP-14** (20 hours at 0.625  $\mu$ M).

| Gene   | Symbol      | Function                                | Fold $\Delta$ | P-value               |
|--------|-------------|-----------------------------------------|---------------|-----------------------|
| MW0356 | <i>ahpF</i> | Alkyl hydroperoxide reductase subunit F | - 1.4         | $9.3 \times 10^{-6}$  |
| MW0357 | <i>ahpC</i> | Alkyl hydroperoxide reductase subunit C | - 1.3         | $5.1 \times 10^{-3}$  |
| MW0726 | <i>trxB</i> | Thioredoxine reductase                  | 1.0           | $7.8 \times 10^{-1}$  |
| MW0107 | <i>sodM</i> | Superoxide dismutase                    | - 1.2         | $2.8 \times 10^{-2}$  |
| MW1505 | <i>sodA</i> | Superoxide dismutase SodA               | - 1.8         | $2.7 \times 10^{-11}$ |

**Note:** Our interest with ROS-related genes is due to the known redox activity of phenazine antibiotics.

**Conclusion:** Based on the data in Supporting Table 3, **HP-14** does not operate through a ROS-based mechanism of action. Minimal or non-significant reductions in gene transcripts observed upon **HP-14** treatment of MRSA biofilms.

**Supporting Table 4:** Genes related to quorum sensing, virulence, biofilm attachment/formation and toxin/antitoxin systems from MRSA-1707 biofilms treated with **HP-14** (20 hours at 0.625  $\mu$ M).

| Gene   | Symbol       | Function                                       | Category            | Fold $\Delta$ | P-value               |
|--------|--------------|------------------------------------------------|---------------------|---------------|-----------------------|
| MW1960 | <i>agrB</i>  | accessory gene regulator B                     | Quorum Sensing      | - 1.1         | $1.7 \times 10^{-1}$  |
| MW1961 | <i>agrD</i>  | AgrD                                           | Quorum Sensing      | - 1.1         | $4.9 \times 10^{-1}$  |
| MW1962 | <i>agrC</i>  | AgrC                                           | Quorum Sensing      | - 1.4         | $4.2 \times 10^{-5}$  |
| MW1963 | <i>agrA</i>  | accessory gene regulator A                     | Quorum Sensing      | - 2.1         | $7.3 \times 10^{-13}$ |
| MW2585 | <i>icaR</i>  | ica operon transcriptional regulator IcaR      | Biofilm Attachment  | 1.8           | $3.6 \times 10^{-12}$ |
| MW2586 | <i>icaA</i>  | intercellular adhesion protein A               | Biofilm Attachment  | 1.1           | $4.0 \times 10^{-1}$  |
| MW2587 | <i>icaD</i>  | intercellular adhesion protein D               | Biofilm Attachment  | - 1.3         | $3.3 \times 10^{-1}$  |
| MW2588 | <i>icaB</i>  | intercellular adhesion protein B               | Biofilm Attachment  | 1.5           | $1.8 \times 10^{-3}$  |
| MW2589 | <i>icaC</i>  | intercellular adhesion protein C               | Biofilm Attachment  | 1.2           | $4.5 \times 10^{-2}$  |
| MW1992 | n.a.         | mRNA interferase MazF <sup>a</sup>             | TX / AT System      | 1.3           | $8.5 \times 10^{-3}$  |
| MW1993 | n.a.         | Antitoxin MazE <sup>a</sup>                    | TX / AT System      | 1.0           | $7.4 \times 10^{-1}$  |
| MW1991 | <i>rsbU</i>  | Sigma regulation protein RsbU                  | TX / AT System      | 1.2           | $5.7 \times 10^{-3}$  |
| MW1990 | <i>rsbV</i>  | Anti-sigmaB factor antagonist                  | TX / AT System      | 1.2           | $2.4 \times 10^{-2}$  |
| MW1989 | <i>rsbW</i>  | Anti-sigmaB factor                             | TX / AT System      | 1.0           | $8.5 \times 10^{-1}$  |
| MW1988 | <i>sigB</i>  | Sigma factor B                                 | TX / AT System      | 1.1           | $4.2 \times 10^{-1}$  |
| MW2330 | n.a.         | Antitoxin YefM <sup>b</sup>                    | TX / AT System      | -2.4          | $2.1 \times 10^{-30}$ |
| MW2329 | n.a.         | Toxin YoeB <sup>b</sup>                        | TX / AT System      | -1.7          | $9.9 \times 10^{-12}$ |
| MW0125 | <i>cap8B</i> | Capsular polysaccharide synthesis enzyme Cap8B | Virulence / Biofilm | -1.1          | $1.5 \times 10^{-1}$  |
| MW0126 | <i>cap8C</i> | Capsular polysaccharide synthesis enzyme Cap8C | Virulence / Biofilm | -1.2          | $2.7 \times 10^{-2}$  |
| MW0127 | <i>cap8D</i> | Capsular polysaccharide synthesis enzyme Cap8D | Virulence / Biofilm | -1.3          | $1.4 \times 10^{-3}$  |
| MW0128 | <i>cap8E</i> | Capsular polysaccharide synthesis enzyme Cap8E | Virulence / Biofilm | -1.4          | $3.4 \times 10^{-5}$  |
| MW0129 | <i>cap8F</i> | Capsular polysaccharide synthesis enzyme Cap8F | Virulence / Biofilm | -1.5          | $1.3 \times 10^{-7}$  |
| MW0130 | <i>cap8G</i> | Capsular polysaccharide synthesis enzyme Cap8G | Virulence / Biofilm | -1.4          | $1.4 \times 10^{-4}$  |
| MW0131 | <i>cap8H</i> | Capsular polysaccharide synthesis enzyme Cap8H | Virulence / Biofilm | -1.3          | $3.0 \times 10^{-4}$  |
| MW0132 | <i>cap8I</i> | Capsular polysaccharide synthesis enzyme Cap8I | Virulence / Biofilm | -1.3          | $2.1 \times 10^{-3}$  |
| MW0133 | <i>cap8J</i> | Capsular polysaccharide synthesis enzyme Cap8J | Virulence / Biofilm | -1.4          | $1.9 \times 10^{-3}$  |
| MW0134 | <i>cap8K</i> | Capsular polysaccharide synthesis enzyme Cap8K | Virulence / Biofilm | -1.3          | $7.6 \times 10^{-4}$  |
| MW0135 | <i>cap8L</i> | Capsular polysaccharide synthesis enzyme Cap8L | Virulence / Biofilm | -1.5          | $2.3 \times 10^{-7}$  |
| MW0136 | <i>cap8M</i> | Capsular polysaccharide synthesis enzyme Cap8M | Virulence / Biofilm | -1.3          | $5.0 \times 10^{-3}$  |
| MW0137 | <i>cap8N</i> | Capsular polysaccharide synthesis enzyme Cap8N | Virulence / Biofilm | -1.4          | $5.2 \times 10^{-5}$  |
| MW0138 | <i>cap8O</i> | Capsular polysaccharide synthesis enzyme Cap8O | Virulence / Biofilm | -1.2          | $7.0 \times 10^{-2}$  |
| MW0139 | <i>cap8P</i> | Capsular polysaccharide synthesis enzyme Cap8P | Virulence / Biofilm | -1.3          | $5.3 \times 10^{-4}$  |

**Note:** TX / AT System = Toxin / Antitoxin system

**Conclusion:** Based on the data in Supporting Table 4, **HP-14** demonstrates minimal impacts on quorum sensing, biofilm attachment, toxin-antitoxin systems and capsular polysaccharide synthesis. Each of these genes are known to have a role in biofilm or persister cell formation.

**Supporting Table 5:** Primers used for qPCR validation experiments.

| Gene   | Symbol       | Forward primer       | Reverse primer       |
|--------|--------------|----------------------|----------------------|
| MW0091 | <i>sbnC</i>  | TCCGGTACATCCTTGGCAAT | GACATGGTTATACGGTGCGC |
| MW1011 | <i>isdB</i>  | CCAGCAGCAAAAGCCACTAA | CGAGAGTTTGGTGCCTATG  |
| MW1754 | <i>splB</i>  | TCAAGTTGAAGAGCGTGCAA | GGTGATCCAGAGTTTCCGCT |
| MW0734 | <i>gap</i>   | GTGGTTTCCGCGTAAATGGT | CGCCTGCTTCAATATGAGCT |
| MW0695 | n.a.         | CTGGAACGATGGAATGGGCT | CGTGCGCAATGAGATGAAGG |
| MW1945 | <i>fhuD1</i> | TGGATTGAAGAGTGGGACGA | CCAAACCACGACCCCATGTA |
| MW0871 | <i>oppF</i>  | TGAATCAGAACGCAGTCGCA | TCGTAGTTGTGCCGCTTCTT |
| MW2106 | <i>sfaA</i>  | GACGATGTGTGCCATTGGTG | TTGTCGTACGTGCCCATGTA |
| MW2554 | <i>arcD</i>  | TCGGTATGACGTCAGAGGGT | TACTGCACCCTCGATACCGA |
| MW0016 | <i>dnaC</i>  | ACAGCAGGGTTCAACCGAAA | CAGCACCCATCTCTAGCGAG |
| MW1611 | <i>hemL</i>  | CCAGATTCTCCTGGTGTGCC | CAATGCGCCGTATTCAGTCG |
| MW2208 | <i>ureC</i>  | ATACTGAAGGTGCTGGTGGC | CTTCACCTACACGGCCCAT  |
| MW1668 | <i>ptaA</i>  | TCCTAGCGAGTTCAGTTGCA | CCAATGGAATGTAGCTGCGA |

**Notes:** Primers were designed using OligoPerfect Primer Designer (Thermofisher). During these studies, *ptaA* was used as the housekeeping gene for MRSA-1707 (*S. aureus* MW2) biofilms.



**Supporting Table 6:** WoPPER analysis of 10 gene clusters identified from **HP-14** treatment of MRSA-1707 biofilms (646 genes analyzed based on  $\geq 1.5$ -fold change in transcript levels).

| Gene                                                                                                                                       | Symbol       | Product                                                               | Fold $\Delta$ | P-value                  |
|--------------------------------------------------------------------------------------------------------------------------------------------|--------------|-----------------------------------------------------------------------|---------------|--------------------------|
| <b>Cluster 1 Iron-regulated Surface Determinant (Heme Iron Acquisition); Average Fold <math>\Delta</math>: 9.96 <math>\pm</math> 5.79</b>  |              |                                                                       |               |                          |
| MW1004                                                                                                                                     | n.a.         | conserved hypothetical protein                                        | 1.7           | 1.0 x 10 <sup>-4</sup>   |
| MW1011                                                                                                                                     | <i>isdB</i>  | conserved hypothetical protein                                        | 10.7          | 4.5 x 10 <sup>-170</sup> |
| MW1012                                                                                                                                     | <i>isdA</i>  | cell surface protein                                                  | 10.4          | 2.3 x 10 <sup>-121</sup> |
| MW1013                                                                                                                                     | <i>isdC</i>  | conserved hypothetical protein                                        | 14.1          | 4.4 x 10 <sup>-131</sup> |
| MW1014                                                                                                                                     | <i>isdD</i>  | conserved hypothetical protein                                        | 14.1          | 9.9 x 10 <sup>-122</sup> |
| MW1015                                                                                                                                     | <i>isdE</i>  | hypothetical protein; similar to ferrichrome ABC transporter          | 12.1          | 2.0 x 10 <sup>-123</sup> |
| MW1016                                                                                                                                     | <i>isdF</i>  | hypothetical protein; similar to ferrichrome ABC transporter          | 10.5          | 1.4 x 10 <sup>-120</sup> |
| MW1017                                                                                                                                     | <i>srtB</i>  | NPQTN specific sortase B                                              | 17.4          | 2.9 x 10 <sup>-137</sup> |
| MW1018                                                                                                                                     | <i>isdG</i>  | conserved hypothetical protein                                        | 10.4          | 4.0 x 10 <sup>-64</sup>  |
| MW1022                                                                                                                                     | <i>pheT</i>  | Phe-tRNA synthetase beta chain                                        | - 1.7         | 3.4 x 10 <sup>-10</sup>  |
| <b>Cluster 2 Staphyloferrin B Biosynthesis (Siderophore; Iron Acquisition); Average Fold <math>\Delta</math>: 9.0 <math>\pm</math> 5.3</b> |              |                                                                       |               |                          |
| MW0085                                                                                                                                     | <i>sarH1</i> | staphylococcal accessory regulator A homologue                        | - 2.0         | 2.9 x 10 <sup>-21</sup>  |
| MW0087                                                                                                                                     | <i>sirB</i>  | iron-regulated ABC transporter siderophore permease protein SirB      | 4.3           | 1.8 x 10 <sup>-43</sup>  |
| MW0088                                                                                                                                     | <i>sirA</i>  | iron-regulated ABC transporter siderophore-binding protein SirA       | 8.6           | 6.4 x 10 <sup>-156</sup> |
| MW0089                                                                                                                                     | <i>sbnA</i>  | hypothetical protein; similar to cysteine synthase                    | 12.4          | 5.7 x 10 <sup>-119</sup> |
| MW0090                                                                                                                                     | <i>sbnB</i>  | putative ornithine cyclodeaminase                                     | 15.1          | 2.3 x 10 <sup>-116</sup> |
| MW0091                                                                                                                                     | <i>sbnC</i>  | siderophore biosynthesis protein SbnC                                 | 16.0          | 4.8 x 10 <sup>-171</sup> |
| MW0092                                                                                                                                     | <i>sbnD</i>  | hypothetical efflux protein                                           | 14.1          | 6.0 x 10 <sup>-151</sup> |
| MW0093                                                                                                                                     | <i>sbnE</i>  | siderophore biosynthesis protein SbnE                                 | 9.2           | 3.3 x 10 <sup>-130</sup> |
| MW0094                                                                                                                                     | <i>sbnF</i>  | siderophore biosynthesis protein SbnF                                 | 8.4           | 3.1 x 10 <sup>-125</sup> |
| MW0095                                                                                                                                     | <i>sbnG</i>  | putative 2-dehydro-3-deoxyglucarate aldolase                          | 6.4           | 8.0 x 10 <sup>-96</sup>  |
| MW0096                                                                                                                                     | <i>sbnH</i>  | putative diaminopimelate decarboxylase                                | 6.2           | 4.1 x 10 <sup>-102</sup> |
| <b>Cluster 3 Ferrichrome ABC Transporter Permease (Iron Acquisition); Average Fold <math>\Delta</math>: 3.55 <math>\pm</math> 0.21</b>     |              |                                                                       |               |                          |
| MW0695                                                                                                                                     | n.a.         | hypothetical protein; similar to ferrichrome ABC transporter permease | 3.7           | 8.5 x 10 <sup>-45</sup>  |
| MW0696                                                                                                                                     | n.a.         | hypothetical protein; similar to ferrichrome ABC transporter permease | 3.4           | 8.3 x 10 <sup>-33</sup>  |
| <b>Cluster 4 Glycolysis (Metabolism of Carbohydrates); Average Fold <math>\Delta</math>: -2.57 <math>\pm</math> 0.29</b>                   |              |                                                                       |               |                          |
| MW1641                                                                                                                                     | <i>pykA</i>  | pyruvate kinase                                                       | - 2.8         | 6.3 x 10 <sup>-43</sup>  |
| MW1642                                                                                                                                     | <i>pfk</i>   | 6-phosphofructokinase                                                 | - 2.4         | 3.7 x 10 <sup>-30</sup>  |
| <b>Cluster 5 Glycolysis (Metabolism of Carbohydrates); Average Fold <math>\Delta</math>: -2.56 <math>\pm</math> 0.79</b>                   |              |                                                                       |               |                          |
| MW0734                                                                                                                                     | <i>gap</i>   | glyceraldehyde-3-phosphate dehydrogenase                              | - 3.7         | 8.4 x 10 <sup>-64</sup>  |
| MW0735                                                                                                                                     | <i>pgk</i>   | phosphoglycerate kinase                                               | - 2.2         | 5.0 x 10 <sup>-25</sup>  |
| MW0737                                                                                                                                     | <i>pgm</i>   | 2,3-diphosphoglycerate-independent phosphoglycerate mutase            | - 2.2         | 3.6 x 10 <sup>-24</sup>  |
| MW0747                                                                                                                                     | n.a.         | hypothetical protein [Genomic island nu Sa alpha3mw]                  | - 2.1         | 2.1 x 10 <sup>-12</sup>  |
| <b>Cluster 6 Function Unknown; Average Fold <math>\Delta</math>: -2.33 <math>\pm</math> 0.48</b>                                           |              |                                                                       |               |                          |
| MW0108                                                                                                                                     | n.a.         | hypothetical protein                                                  | - 2.8         | 2.6 x 10 <sup>-43</sup>  |
| MW0113                                                                                                                                     | <i>drm</i>   | phosphopentomutase                                                    | - 2.2         | 3.3 x 10 <sup>-20</sup>  |
| MW0119                                                                                                                                     | n.a.         | hypothetical protein; similar to lactococcal phosphatase homologue    | - 1.9         | 2.0 x 10 <sup>-19</sup>  |
| <b>Cluster 7 Uroporphyrinogen III Biosynthesis (Heme Biosynthesis); Average Fold <math>\Delta</math>: -2.25 <math>\pm</math> 0.41</b>      |              |                                                                       |               |                          |
| MW1595                                                                                                                                     | <i>rpmA</i>  | 50S ribosomal protein L27 (BL30) (BL24)                               | - 1.7         | 9.1 x 10 <sup>-11</sup>  |
| MW1611                                                                                                                                     | <i>hemL</i>  | glutamate-1-semialdehyde 2,1-aminomutase                              | - 2.6         | 7.1 x 10 <sup>-23</sup>  |
| MW1612                                                                                                                                     | <i>hemB</i>  | delta-aminolevulinic acid dehydratase                                 | - 2.5         | 2.5 x 10 <sup>-22</sup>  |
| MW1613                                                                                                                                     | <i>hemD</i>  | uroporphyrinogen III synthase                                         | - 2.3         | 5.2 x 10 <sup>-22</sup>  |
| <b>Cluster 8 Function Unknown; Average Fold <math>\Delta</math>: -2.22 <math>\pm</math> 0.66</b>                                           |              |                                                                       |               |                          |
| MW0957                                                                                                                                     | <i>purD</i>  | phosphoribosylamine-glycine ligase PurD                               | - 1.6         | 2.8 x 10 <sup>-8</sup>   |
| MW0958                                                                                                                                     | n.a.         | conserved hypothetical protein                                        | - 2.9         | 1.4 x 10 <sup>-38</sup>  |
| MW0959                                                                                                                                     | n.a.         | hypothetical protein; similar to cation ABC transporter               | - 2.1         | 5.0 x 10 <sup>-19</sup>  |
| <b>Cluster 9 Function Unknown; Average Fold <math>\Delta</math>: -2.20 <math>\pm</math> 0.83</b>                                           |              |                                                                       |               |                          |
| MW1152                                                                                                                                     | <i>infB</i>  | translation initiation factor IF-2                                    | - 2.8         | 1.2 x 10 <sup>-32</sup>  |
| MW1153                                                                                                                                     | <i>rbfA</i>  | ribosome-binding factor A                                             | - 1.6         | 5.0 x 10 <sup>-9</sup>   |
| <b>Cluster 10 Function Unknown; Average Fold <math>\Delta</math>: -2.1 <math>\pm</math> 0.32</b>                                           |              |                                                                       |               |                          |

|        |             |                                       |       |                       |
|--------|-------------|---------------------------------------|-------|-----------------------|
| MW0015 | <i>rplI</i> | 50S ribosomal protein L9              | - 2.4 | $9.4 \times 10^{-27}$ |
| MW0016 | <i>dnaC</i> | replicative DNA helicase              | - 2.4 | $5.2 \times 10^{-20}$ |
| MW0019 | <i>vicK</i> | two-component sensor histidine kinase | - 1.6 | $2.5 \times 10^{-9}$  |
| MW0020 | n.a.        | conserved hypothetical protein        | - 2.0 | $1.3 \times 10^{-15}$ |
| MW0021 | n.a.        | conserved hypothetical protein        | - 2.1 | $8.2 \times 10^{-17}$ |

**Notes:** Genes were inserted into WoPPER analysis web tool (<https://wopper.ba.itb.cnr.it/Articles>) to identify gene clusters that had altered transcript profiles upon treatment of MRSA-1707 biofilms with **HP-14**. All gene symbols and names in this table were retrieved from DOGAN which is a genome database of microorganisms sequenced at NITE (<http://www.bio.nite.go.jp/dogan/top>).

**Supporting Table 7:** WoPPER analysis of 37 gene clusters identified from **HP-14** treatment of MRSA-1707 biofilms (all 2,738 genes examined).

| <b>Cluster 1: <i>isd/srtB</i> (Heme Iron Acquisition); Average Fold <math>\Delta</math>: 11.0 <math>\pm</math> 5.1</b>                                         |              |                                                                             |               |                          |
|----------------------------------------------------------------------------------------------------------------------------------------------------------------|--------------|-----------------------------------------------------------------------------|---------------|--------------------------|
| Genes                                                                                                                                                          | Symbol       | Function                                                                    | Fold $\Delta$ | P-value                  |
| MW1011                                                                                                                                                         | <i>isdB</i>  | conserved hypothetical protein                                              | 10.7          | 4.5 x 10 <sup>-170</sup> |
| MW1012                                                                                                                                                         | <i>isdA</i>  | cell surface protein                                                        | 10.4          | 2.3 x 10 <sup>-121</sup> |
| MW1013                                                                                                                                                         | <i>isdC</i>  | conserved hypothetical protein                                              | 14.1          | 4.4 x 10 <sup>-131</sup> |
| MW1014                                                                                                                                                         | <i>isdD</i>  | conserved hypothetical protein                                              | 14.1          | 9.9 x 10 <sup>-122</sup> |
| MW1015                                                                                                                                                         | <i>isdE</i>  | hypothetical protein; similar to ferrichrome ABC transporter                | 12.1          | 2.0 x 10 <sup>-123</sup> |
| MW1016                                                                                                                                                         | <i>isdF</i>  | hypothetical protein; similar to ferrichrome ABC transporter                | 10.5          | 1.4 x 10 <sup>-120</sup> |
| MW1017                                                                                                                                                         | <i>srtB</i>  | NPQTN specific sortase B                                                    | 17.4          | 2.9 x 10 <sup>-137</sup> |
| MW1018                                                                                                                                                         | <i>isdG</i>  | conserved hypothetical protein                                              | 10.4          | 4.0 x 10 <sup>-64</sup>  |
| MW1020                                                                                                                                                         | n.a.         | hypothetical protein; similar to rRNA methylase                             | - 1.1         | 3.9 x 10 <sup>-1</sup>   |
| <b>Cluster 2: <i>sir/sbn</i> (Staphyloferrin B Biosynthesis &amp; Transport; Iron Acquisition); Average Fold <math>\Delta</math>: 8.4 <math>\pm</math> 4.9</b> |              |                                                                             |               |                          |
| Genes                                                                                                                                                          | Symbol       | Function                                                                    | Fold $\Delta$ | P-value                  |
| MW0086                                                                                                                                                         | <i>sirC</i>  | iron-regulated ABC transporter siderophore permease protein SirC            | 1.3           | 2.7 x 10 <sup>-5</sup>   |
| MW0087                                                                                                                                                         | <i>sirB</i>  | iron-regulated ABC transporter siderophore permease protein SirB            | 4.3           | 1.8 x 10 <sup>-43</sup>  |
| MW0088                                                                                                                                                         | <i>sirA</i>  | iron-regulated ABC transporter siderophore-binding protein SirA             | 8.6           | 6.4 x 10 <sup>-156</sup> |
| MW0089                                                                                                                                                         | <i>sbnA</i>  | hypothetical protein; similar to cysteine synthase                          | 12.4          | 5.7 x 10 <sup>-119</sup> |
| MW0090                                                                                                                                                         | <i>sbnB</i>  | putative ornithine cyclodeaminase                                           | 15.1          | 2.3 x 10 <sup>-116</sup> |
| MW0091                                                                                                                                                         | <i>sbnC</i>  | siderophore biosynthesis protein SbnC                                       | 16.0          | 4.8 x 10 <sup>-171</sup> |
| MW0092                                                                                                                                                         | <i>sbnD</i>  | hypothetical efflux protein                                                 | 14.1          | 6.0 x 10 <sup>-151</sup> |
| MW0093                                                                                                                                                         | <i>sbnE</i>  | siderophore biosynthesis protein SbnE                                       | 9.2           | 3.3 x 10 <sup>-130</sup> |
| MW0094                                                                                                                                                         | <i>sbnF</i>  | siderophore biosynthesis protein SbnF                                       | 8.4           | 3.1 x 10 <sup>-125</sup> |
| MW0095                                                                                                                                                         | <i>sbnG</i>  | putative 2-dehydro-3-deoxyglucarate aldolase                                | 6.4           | 8.0 x 10 <sup>-96</sup>  |
| MW0096                                                                                                                                                         | <i>sbnH</i>  | putative diaminopimelate decarboxylase                                      | 6.2           | 4.1 x 10 <sup>-102</sup> |
| MW0097                                                                                                                                                         | <i>sbnI</i>  | hypothetical protein                                                        | 5.6           | 1.4 x 10 <sup>-86</sup>  |
| MW0098                                                                                                                                                         | n.a.         | hypothetical protein                                                        | 1.6           | 1.7 x 10 <sup>-4</sup>   |
| <b>Cluster 3: <i>spl</i> (Serine Proteases); Average Fold <math>\Delta</math>: 6.8 <math>\pm</math> 4.9</b>                                                    |              |                                                                             |               |                          |
| Genes                                                                                                                                                          | Symbol       | Function                                                                    | Fold $\Delta$ | P-value                  |
| MW1751                                                                                                                                                         | <i>hsdM</i>  | type I restriction enzyme EcoR124II M protein homologue                     | 1.1           | 1.5 x 10 <sup>-1</sup>   |
| MW1752                                                                                                                                                         | <i>splF</i>  | serine protease SplF [Genomic island nu Sa beta2]                           | 7.4           | 3.4 x 10 <sup>-131</sup> |
| MW1753                                                                                                                                                         | <i>splC</i>  | serine protease SplC [Genomic island nu Sa beta2]                           | 9.6           | 1.3 x 10 <sup>-129</sup> |
| MW1754                                                                                                                                                         | <i>splB</i>  | serine protease SplB [Genomic island nu Sa beta2]                           | 13.7          | 2.9 x 10 <sup>-107</sup> |
| MW1755                                                                                                                                                         | <i>splA</i>  | serine protease SplA [Genomic island nu Sa beta2]                           | 10.9          | 1.6 x 10 <sup>-111</sup> |
| MW1756                                                                                                                                                         | n.a.         | hypothetical protein [Genomic island nu Sa beta2]                           | 3.5           | 6.2 x 10 <sup>-2</sup>   |
| MW1757                                                                                                                                                         | n.a.         | hypothetical protein; similar to Ear protein [Genomic island nu Sa beta2]   | 1.6           | 2.7 x 10 <sup>-4</sup>   |
| <b>Cluster 4: Oligopeptide Transporter System (Bacterial Nutrition, Signaling &amp; Virulence); Average Fold <math>\Delta</math>: 5.3 <math>\pm</math> 2.0</b> |              |                                                                             |               |                          |
| Genes                                                                                                                                                          | Symbol       | Function                                                                    | Fold $\Delta$ | P-value                  |
| MW2384                                                                                                                                                         | n.a.         | hypothetical protein                                                        | 1.4           | 1.3 x 10 <sup>-4</sup>   |
| MW2386                                                                                                                                                         | n.a.         | hypothetical protein; similar to antibiotic resistance protein              | 4.0           | 3.8 x 10 <sup>-72</sup>  |
| MW2387                                                                                                                                                         | n.a.         | oligopeptide transporter putative ATPase domain                             | 5.5           | 3.9 x 10 <sup>-101</sup> |
| MW2388                                                                                                                                                         | n.a.         | oligopeptide transporter putative ATPase domain                             | 7.5           | 3.6 x 10 <sup>-119</sup> |
| MW2389                                                                                                                                                         | n.a.         | oligopeptide transporter putative membrane permease domain                  | 7.8           | 8.1 x 10 <sup>-126</sup> |
| MW2390                                                                                                                                                         | n.a.         | oligopeptide transporter putative membrane permease domain                  | 3.8           | 8.0 x 10 <sup>-78</sup>  |
| MW2391                                                                                                                                                         | n.a.         | oligopeptide transporter putative substrate binding domain                  | 4.6           | 9.7 x 10 <sup>-86</sup>  |
| MW2392                                                                                                                                                         | n.a.         | conserved hypothetical protein                                              | 6.7           | 1.7 x 10 <sup>-73</sup>  |
| MW2393                                                                                                                                                         | n.a.         | conserved hypothetical protein                                              | 6.8           | 3.0 x 10 <sup>-78</sup>  |
| MW2394                                                                                                                                                         | n.a.         | hypothetical protein; similar to diaminopimelate epimerase                  | 5.3           | 1.4 x 10 <sup>-62</sup>  |
| <b>Cluster 5: <i>fhuD1</i> (Ferric Hydroxamate Transport; Iron Acquisition); Average Fold <math>\Delta</math>: 3.7 <math>\pm</math> 1.4</b>                    |              |                                                                             |               |                          |
| Genes                                                                                                                                                          | Symbol       | Function                                                                    | Fold $\Delta$ | P-value                  |
| MW1944                                                                                                                                                         | n.a.         | hypothetical protein                                                        | 3.6           | 6.8 x 10 <sup>-34</sup>  |
| MW1945                                                                                                                                                         | <i>fhuD1</i> | hydroxamate siderophore binding lipoprotein                                 | 5.0           | 2.6 x 10 <sup>-58</sup>  |
| MW1946                                                                                                                                                         | n.a.         | hypothetical protein; similar to Na <sup>+</sup> -transporting ATP synthase | 2.3           | 6.4 x 10 <sup>-23</sup>  |

| <b>Cluster 6: Function Unknown; Average Fold <math>\Delta</math>: 3.6 <math>\pm</math> 2.5</b>                                                                |             |                                                                                   |               |                         |
|---------------------------------------------------------------------------------------------------------------------------------------------------------------|-------------|-----------------------------------------------------------------------------------|---------------|-------------------------|
| Genes                                                                                                                                                         | Symbol      | Function                                                                          | Fold $\Delta$ | P-value                 |
| MW0190                                                                                                                                                        | n.a.        | hypothetical protein; similar to maltose/maltodextrin-binding protein             | 1.7           | 6.2 x 10 <sup>-11</sup> |
| MW0191                                                                                                                                                        | n.a.        | maltose/maltodextrin transport permease homologue                                 | 4.8           | 1.2 x 10 <sup>-76</sup> |
| MW0192                                                                                                                                                        | n.a.        | maltose/maltodextrin transport permease homologue                                 | 3.4           | 1.5 x 10 <sup>-52</sup> |
| MW0193                                                                                                                                                        | n.a.        | hypothetical protein; similar to NADH-dependent dehydrogenase                     | 5.3           | 9.0 x 10 <sup>-84</sup> |
| MW0194                                                                                                                                                        | n.a.        | hypothetical protein; similar to NADH-dependent dehydrogenase                     | 5.7           | 1.9 x 10 <sup>-89</sup> |
| MW0195                                                                                                                                                        | n.a.        | conserved hypothetical protein                                                    | 5.6           | 2.0 x 10 <sup>-84</sup> |
| MW0196                                                                                                                                                        | n.a.        | conserved hypothetical protein                                                    | - 1.0         | 8.1 x 10 <sup>-1</sup>  |
| <b>Cluster 7: Oligopeptide Transport Systems (Bacterial Nutrition, Signaling &amp; Virulence); Average Fold <math>\Delta</math>: 3.1 <math>\pm</math> 0.6</b> |             |                                                                                   |               |                         |
| Genes                                                                                                                                                         | Symbol      | Function                                                                          | Fold $\Delta$ | P-value                 |
| MW0869                                                                                                                                                        | n.a.        | hypothetical protein; similar, oligopeptide transport syst. permease protein OppC | 2.3           | 4.9 x 10 <sup>-13</sup> |
| MW0870                                                                                                                                                        | <i>oppD</i> | oligopeptide transport system ATP-binding protein OppD homologue                  | 3.3           | 4.9 x 10 <sup>-36</sup> |
| MW0871                                                                                                                                                        | <i>oppF</i> | oligopeptide transport system ATP-binding protein OppF homologue                  | 3.6           | 3.1 x 10 <sup>-45</sup> |
| MW0872                                                                                                                                                        | n.a.        | hypothetical protein; similar to peptide binding protein OppA                     | 3.0           | 5.2 x 10 <sup>-37</sup> |
| <b>Cluster 8: Ferrichrome ABC Transporters (Iron Acquisition); Average Fold <math>\Delta</math>: 3.0 <math>\pm</math> 0.6</b>                                 |             |                                                                                   |               |                         |
| Genes                                                                                                                                                         | Symbol      | Function                                                                          | Fold $\Delta$ | P-value                 |
| MW0695                                                                                                                                                        | n.a.        | hypothetical protein; similar to ferrichrome ABC transporter permease             | 3.7           | 8.5 x 10 <sup>-45</sup> |
| MW0696                                                                                                                                                        | n.a.        | hypothetical protein; similar to ferrichrome ABC transporter permease             | 3.4           | 8.3 x 10 <sup>-33</sup> |
| MW0697                                                                                                                                                        | n.a.        | hypothetical protein; similar to ferrichrome ABC transport, ATP-binding protein   | 2.8           | 2.5 x 10 <sup>-27</sup> |
| MW0698                                                                                                                                                        | n.a.        | lipoprotein, similar to ferrichrome ABC transporter                               | 2.3           | 9.1 x 10 <sup>-20</sup> |
| <b>Cluster 9: Fructose &amp; Mannose Metabolism; Average Fold <math>\Delta</math>: 2.9 <math>\pm</math> 1.2</b>                                               |             |                                                                                   |               |                         |
| Genes                                                                                                                                                         | Symbol      | Function                                                                          | Fold $\Delta$ | P-value                 |
| MW2562                                                                                                                                                        | n.a.        | fructose phosphotransferase system enzyme fruA homologue                          | 3.7           | 6.3 x 10 <sup>-53</sup> |
| MW2563                                                                                                                                                        | <i>pmi</i>  | mannose-6-phosphate isomerase                                                     | 2.0           | 6.0 x 10 <sup>-18</sup> |
| <b>Cluster 10: Function Unknown; Average Fold <math>\Delta</math>: 2.9 <math>\pm</math> 1.3</b>                                                               |             |                                                                                   |               |                         |
| Genes                                                                                                                                                         | Symbol      | Function                                                                          | Fold $\Delta$ | P-value                 |
| MW0594                                                                                                                                                        | n.a.        | conserved hypothetical protein                                                    | 2.0           | 1.7 x 10 <sup>-19</sup> |
| MW0595                                                                                                                                                        | n.a.        | hypothetical protein; similar to ABC transporter ATP-binding protein              | 3.8           | 6.3 x 10 <sup>-48</sup> |
| <b>Cluster 11: Staphyloferrin A Biosynthesis; Average Fold <math>\Delta</math>: 2.9 <math>\pm</math> 1.3</b>                                                  |             |                                                                                   |               |                         |
| Genes                                                                                                                                                         | Symbol      | Function                                                                          | Fold $\Delta$ | P-value                 |
| MW2100                                                                                                                                                        | n.a.        | conserved hypothetical protein                                                    | 2.0           | 6.8 x 10 <sup>-21</sup> |
| MW2102                                                                                                                                                        | <i>htsB</i> | hypothetical protein; similar to ferrichrome ABC transporter (permease)           | 3.8           | 9.3 x 10 <sup>-54</sup> |
| MW2103                                                                                                                                                        | <i>htsA</i> | hypothetical protein; similar to ferrichrome ABC transporter                      | 3.9           | 1.0 x 10 <sup>-67</sup> |
| MW2104                                                                                                                                                        | <i>sfaC</i> | conserved hypothetical protein                                                    | 1.6           | 7.4 x 10 <sup>-13</sup> |
| MW2105                                                                                                                                                        | <i>sfaB</i> | conserved hypothetical protein                                                    | 1.6           | 4.4 x 10 <sup>-9</sup>  |
| MW2106                                                                                                                                                        | <i>sfaA</i> | hypothetical protein; similar to transporter                                      | 4.6           | 6.4 x 10 <sup>-72</sup> |
| <b>Cluster 12: Arginine Deaminase (Utilization of Arginine for Energy, Anaerobic Conditions); Average Fold <math>\Delta</math>: -2.6 <math>\pm</math> 0.8</b> |             |                                                                                   |               |                         |
| Genes                                                                                                                                                         | Symbol      | Function                                                                          | Fold $\Delta$ | P-value                 |
| MW2552                                                                                                                                                        | n.a.        | hypothetical protein; similar to transcription regulator Crp/Fnr family protein   | - 3.0         | 2.0 x 10 <sup>-18</sup> |
| MW2553                                                                                                                                                        | <i>arcC</i> | carbamate kinase                                                                  | - 2.9         | 1.5 x 10 <sup>-17</sup> |
| MW2554                                                                                                                                                        | <i>arcD</i> | arginine/ornithine antiporter                                                     | - 3.6         | 1.6 x 10 <sup>-25</sup> |
| MW2555                                                                                                                                                        | <i>arcB</i> | ornithine transcarbamoylase                                                       | - 2.1         | 7.5 x 10 <sup>-13</sup> |
| MW2556                                                                                                                                                        | <i>arcA</i> | arginine deiminase                                                                | - 1.6         | 3.6 x 10 <sup>-9</sup>  |
| <b>Cluster 13: Function Unknown; Average Fold <math>\Delta</math>: 2.5 <math>\pm</math> 1.8</b>                                                               |             |                                                                                   |               |                         |
| Genes                                                                                                                                                         | Symbol      | Function                                                                          | Fold $\Delta$ | P-value                 |
| MW1674                                                                                                                                                        | n.a.        | hypothetical protein                                                              | 3.8           | 5.5 x 10 <sup>-75</sup> |
| MW1675                                                                                                                                                        | <i>fhs</i>  | formyltetrahydrofolate synthetase                                                 | 1.2           | 5.3 x 10 <sup>-2</sup>  |
| <b>Cluster 14: Function Unknown; Average Fold <math>\Delta</math>: 2.4 <math>\pm</math> 0.7</b>                                                               |             |                                                                                   |               |                         |
| Genes                                                                                                                                                         | Symbol      | Function                                                                          | Fold $\Delta$ | P-value                 |
| MW0427                                                                                                                                                        | <i>gltD</i> | NADH-glutamate synthase small subunit                                             | 2.6           | 4.0 x 10 <sup>-36</sup> |
| MW0428                                                                                                                                                        | <i>treP</i> | PTS enzyme II, phosphoenolpyruvate-dependent, trehalose-specific                  | 2.1           | 1.1 x 10 <sup>-21</sup> |
| MW0429                                                                                                                                                        | n.a.        | alpha-glucosidase                                                                 | 2.7           | 5.2 x 10 <sup>-34</sup> |
| MW0430                                                                                                                                                        | n.a.        | hypothetical protein; similar to trehalose operon transcriptional repressor       | 3.3           | 1.9 x 10 <sup>-48</sup> |

| MW0432                                                                                                                                        | n.a.        | conserved hypothetical protein                                                   | 1.4           | $2.1 \times 10^{-5}$  |
|-----------------------------------------------------------------------------------------------------------------------------------------------|-------------|----------------------------------------------------------------------------------|---------------|-----------------------|
| <b>Cluster 15: Branched Chain Amino Acid Synthesis; Average Fold <math>\Delta</math>: <math>2.4 \pm 0.3</math></b>                            |             |                                                                                  |               |                       |
| Genes                                                                                                                                         | Symbol      | Function                                                                         | Fold $\Delta$ | P-value               |
| MW1977                                                                                                                                        | <i>ilvD</i> | dihydroxy-acid dehydratase                                                       | 2.1           | $7.5 \times 10^{-12}$ |
| MW1978                                                                                                                                        | <i>ilvB</i> | acetolactate synthase large subunit                                              | 2.0           | $2.8 \times 10^{-14}$ |
| MW1979                                                                                                                                        | n.a.        | hypothetical protein, similar to acetolactate synthase small subunit             | 2.7           | $5.7 \times 10^{-4}$  |
| MW1980                                                                                                                                        | <i>ilvC</i> | alpha-keto-beta-hydroxyacyl reductoisomerase                                     | 2.4           | $1.2 \times 10^{-18}$ |
| MW1981                                                                                                                                        | <i>leuA</i> | 2-isopropylmalate synthase                                                       | 2.5           | $3.5 \times 10^{-22}$ |
| MW1982                                                                                                                                        | <i>leuB</i> | 3-isopropylmalate dehydrogenase                                                  | 2.2           | $1.7 \times 10^{-20}$ |
| MW1983                                                                                                                                        | <i>leuC</i> | 3-isopropylmalate dehydratase large subunit                                      | 2.6           | $1.2 \times 10^{-28}$ |
| MW1985                                                                                                                                        | <i>ilvA</i> | threonine dehydratase                                                            | 3.0           | $4.9 \times 10^{-45}$ |
| <b>Cluster 16: Function Unknown; Average Fold <math>\Delta</math>: <math>-2.4 \pm 0.7</math></b>                                              |             |                                                                                  |               |                       |
| Genes                                                                                                                                         | Symbol      | Function                                                                         | Fold $\Delta$ | P-value               |
| MW1761                                                                                                                                        | n.a.        | hypothe. pr.; epidermin leader peptide processing serine protease epip precursor | - 1.6         | $3.0 \times 10^{-8}$  |
| MW1762                                                                                                                                        | n.a.        | hypothe. protein; similar to lantibiotic epidermin biosynthesis protein EpiD     | - 3.3         | $2.4 \times 10^{-29}$ |
| MW1763                                                                                                                                        | n.a.        | hypothe. protein; similar to lantibiotic epidermin biosynthesis protein EpiC     | - 2.7         | $1.2 \times 10^{-26}$ |
| MW1764                                                                                                                                        | n.a.        | hypothe. protein; similar to lantibiotic epidermin biosynthesis protein EpiB     | - 2.0         | $5.7 \times 10^{-23}$ |
| <b>Cluster 17: Glycolysis (Metabolism of Carbohydrates); Average Fold <math>\Delta</math>: <math>-2.4 \pm 1.0</math></b>                      |             |                                                                                  |               |                       |
| Genes                                                                                                                                         | Symbol      | Function                                                                         | Fold $\Delta$ | P-value               |
| MW0733                                                                                                                                        | <i>gapR</i> | glycolytic operon regulator                                                      | - 1.4         | $3.6 \times 10^{-4}$  |
| MW0734                                                                                                                                        | <i>gap</i>  | glyceraldehyde-3-phosphate dehydrogenase                                         | - 3.7         | $8.4 \times 10^{-64}$ |
| MW0735                                                                                                                                        | <i>pgk</i>  | phosphoglycerate kinase                                                          | - 2.2         | $5.0 \times 10^{-25}$ |
| MW0737                                                                                                                                        | <i>pgm</i>  | 2,3-diphosphoglycerate-independent phosphoglycerate mutase                       | - 2.2         | $3.6 \times 10^{-24}$ |
| <b>Cluster 18: Function Unknown; Average Fold <math>\Delta</math>: <math>2.3 \pm 0.7</math></b>                                               |             |                                                                                  |               |                       |
| Genes                                                                                                                                         | Symbol      | Function                                                                         | Fold $\Delta$ | P-value               |
| MW1214                                                                                                                                        | n.a.        | aspartate kinase homologue                                                       | 2.8           | $6.0 \times 10^{-48}$ |
| MW1215                                                                                                                                        | <i>dhoM</i> | homoserine dehydrogenase                                                         | 1.8           | $1.2 \times 10^{-15}$ |
| <b>Cluster 19: Function Unknown; Average Fold <math>\Delta</math>: <math>-2.2 \pm 0.6</math></b>                                              |             |                                                                                  |               |                       |
| Genes                                                                                                                                         | Symbol      | Function                                                                         | Fold $\Delta$ | P-value               |
| MW0957                                                                                                                                        | <i>purD</i> | phosphoribosylamine--glycine ligase PurD                                         | - 1.6         | $2.8 \times 10^{-8}$  |
| MW0958                                                                                                                                        | n.a.        | conserved hypothetical protein                                                   | - 2.9         | $1.4 \times 10^{-38}$ |
| MW0959                                                                                                                                        | n.a.        | hypothetical protein; similar to cation ABC transporter                          | - 2.1         | $5.0 \times 10^{-19}$ |
| MW0960                                                                                                                                        | n.a.        | conserved hypothetical protein                                                   | - 1.9         | $7.1 \times 10^{-16}$ |
| <b>Cluster 20: <i>fhu</i> (Ferric Hydroxamate Transporters; Iron Acquisition); Average Fold <math>\Delta</math>: <math>2.2 \pm 0.2</math></b> |             |                                                                                  |               |                       |
| Genes                                                                                                                                         | Symbol      | Function                                                                         | Fold $\Delta$ | P-value               |
| MW0610                                                                                                                                        | <i>fhuB</i> | ferric hydroxamate transport permease                                            | 2.3           | $7.0 \times 10^{-36}$ |
| MW0611                                                                                                                                        | <i>fhuG</i> | ferric hydroxamate transport permease                                            | 2.0           | $9.1 \times 10^{-23}$ |
| <b>Cluster 21: Function Unknown; Average Fold <math>\Delta</math>: <math>-2.2 \pm 2.7</math></b>                                              |             |                                                                                  |               |                       |
| Genes                                                                                                                                         | Symbol      | Function                                                                         | Fold $\Delta$ | P-value               |
| MW2279                                                                                                                                        | n.a.        | hypothetical protein; similar to membrane protein                                | - 1.0         | $9.4 \times 10^{-1}$  |
| MW2280                                                                                                                                        | n.a.        | hypothetical protein; similar to ABC transporter, ATP-binding protein            | - 4.3         | $6.9 \times 10^{-99}$ |
| MW2281                                                                                                                                        | n.a.        | conserved hypothetical protein                                                   | - 4.5         | $1.4 \times 10^{-84}$ |
| MW2282                                                                                                                                        | n.a.        | hypothetical protein; similar to two component response regulator                | 1.0           | $8.3 \times 10^{-1}$  |
| <b>Cluster 22: Function Unknown; Average Fold <math>\Delta</math>: <math>2.1 \pm 0.8</math></b>                                               |             |                                                                                  |               |                       |
| Genes                                                                                                                                         | Symbol      | Function                                                                         | Fold $\Delta$ | P-value               |
| MW0141                                                                                                                                        | n.a.        | conserved hypothetical protein                                                   | 3.9           | $7.2 \times 10^{-40}$ |
| MW0142                                                                                                                                        | <i>aldA</i> | aldehyde dehydrogenase homologue                                                 | 1.9           | $3.9 \times 10^{-9}$  |
| MW0143                                                                                                                                        | n.a.        | hypothetical protein; similar to cation-efflux system membrane protein CzcD      | 1.6           | $7.6 \times 10^{-9}$  |
| MW0144                                                                                                                                        | n.a.        | hypothetical protein                                                             | 1.8           | $7.3 \times 10^{-6}$  |
| MW0145                                                                                                                                        | n.a.        | hypothetical protein; similar to alpha-helical coiled-coil protein SrpF          | 1.7           | $1.4 \times 10^{-11}$ |
| MW0146                                                                                                                                        | n.a.        | hypothetical protein; similar to nitrate transporter                             | 1.9           | $3.5 \times 10^{-13}$ |
| MW0147                                                                                                                                        | n.a.        | hypothetical protein; similar to membrane lipoprotein SrpL                       | 1.8           | $2.9 \times 10^{-13}$ |
| <b>Cluster 23: Function Unknown; Average Fold <math>\Delta</math>: <math>2.1 \pm 0.1</math></b>                                               |             |                                                                                  |               |                       |
| Genes                                                                                                                                         | Symbol      | Function                                                                         | Fold $\Delta$ | P-value               |

| MW0164                                                                                                                                  | n.a.        | conserved hypothetical protein                                                  | 2.2           | $2.5 \times 10^{-25}$ |
|-----------------------------------------------------------------------------------------------------------------------------------------|-------------|---------------------------------------------------------------------------------|---------------|-----------------------|
| MW0166                                                                                                                                  | n.a.        | hypothetical protein; similar to sucrose phosphotransferase enzyme II           | 2.0           | $1.3 \times 10^{-16}$ |
| <b>Cluster 24: Function Unknown; Average Fold <math>\Delta</math>: <math>2.1 \pm 0.6</math></b>                                         |             |                                                                                 |               |                       |
| Genes                                                                                                                                   | Symbol      | Function                                                                        | Fold $\Delta$ | P-value               |
| MW0151                                                                                                                                  | <i>fdh</i>  | NAD-dependent formate dehydrogenase                                             | 2.5           | $1.4 \times 10^{-22}$ |
| MW0152                                                                                                                                  | n.a.        | hypothetical protein, similar to integral membrane protein LmrP                 | 1.6           | $3.0 \times 10^{-10}$ |
| <b>Cluster 25: <i>ure</i> Operon (Encodes for Urease); Average Fold <math>\Delta</math>: <math>-2.0 \pm 0.1</math></b>                  |             |                                                                                 |               |                       |
| Genes                                                                                                                                   | Symbol      | Function                                                                        | Fold $\Delta$ | P-value               |
| MW2208                                                                                                                                  | <i>ureC</i> | urease alpha subunit                                                            | - 2.2         | $2.1 \times 10^{-32}$ |
| MW2210                                                                                                                                  | <i>ureF</i> | urease accessory protein UreF                                                   | - 2.0         | $1.8 \times 10^{-18}$ |
| MW2211                                                                                                                                  | <i>ureG</i> | urease accessory protein UreG                                                   | - 1.9         | $1.7 \times 10^{-18}$ |
| <b>Cluster 26: Function Unknown; Average Fold <math>\Delta</math>: <math>-2.0 \pm 0.8</math></b>                                        |             |                                                                                 |               |                       |
| Genes                                                                                                                                   | Symbol      | Function                                                                        | Fold $\Delta$ | P-value               |
| MW0015                                                                                                                                  | <i>rplI</i> | 50S ribosomal protein L9                                                        | - 2.3         | $9.4 \times 10^{-27}$ |
| MW0016                                                                                                                                  | <i>dnaC</i> | replicative DNA helicase                                                        | - 2.4         | $5.2 \times 10^{-20}$ |
| MW0017                                                                                                                                  | <i>purA</i> | adenylosuccinate synthase                                                       | - 1.1         | $3.9 \times 10^{-1}$  |
| <b>Cluster 27: Function Unknown; Average Fold <math>\Delta</math>: <math>-1.9 \pm 0.3</math></b>                                        |             |                                                                                 |               |                       |
| Genes                                                                                                                                   | Symbol      | Function                                                                        | Fold $\Delta$ | P-value               |
| MW0019                                                                                                                                  | <i>vicK</i> | two-component sensor histidine kinase                                           | - 1.6         | $2.5 \times 10^{-09}$ |
| MW0020                                                                                                                                  | n.a.        | conserved hypothetical protein                                                  | - 2.0         | $1.3 \times 10^{-15}$ |
| MW0021                                                                                                                                  | n.a.        | conserved hypothetical protein                                                  | - 2.1         | $8.2 \times 10^{-17}$ |
| <b>Cluster 28: Function Unknown; Average Fold <math>\Delta</math>: <math>-1.9 \pm 0.3</math></b>                                        |             |                                                                                 |               |                       |
| Genes                                                                                                                                   | Symbol      | Function                                                                        | Fold $\Delta$ | P-value               |
| MW2229                                                                                                                                  | n.a.        | formate dehydrogenase homologue                                                 | - 1.5         | $7.3 \times 10^{-7}$  |
| MW2230                                                                                                                                  | n.a.        | hypothetical protein; similar to <i>lyt</i> divergon expression attenuator LytR | - 2.2         | $2.7 \times 10^{-18}$ |
| MW2231                                                                                                                                  | n.a.        | hypothetical protein; similar to suppressor protein <i>subB</i>                 | - 1.9         | $1.7 \times 10^{-13}$ |
| <b>Cluster 29: Quinol Oxidase Polypeptides (Oxidative Phosphorylation); Average Fold <math>\Delta</math>: <math>-1.9 \pm 0.3</math></b> |             |                                                                                 |               |                       |
| Genes                                                                                                                                   | Symbol      | Function                                                                        | Fold $\Delta$ | P-value               |
| MW0941                                                                                                                                  | n.a.        | hypothetical protein; similar to quinol oxidase polypeptide IV QoxD             | - 1.8         | $1.9 \times 10^{-10}$ |
| MW0942                                                                                                                                  | <i>qoxC</i> | Quinol oxidase polypeptide III QoxC                                             | - 1.5         | $7.4 \times 10^{-06}$ |
| MW0943                                                                                                                                  | <i>qoxB</i> | Quinol oxidase polypeptide I QoxB                                               | - 2.1         | $3.9 \times 10^{-16}$ |
| MW0944                                                                                                                                  | n.a.        | hypothetical protein; similar to quinol oxidase polypeptide II QoxA             | - 2.2         | $4.4 \times 10^{-23}$ |
| <b>Cluster 30: Function Unknown; Average Fold <math>\Delta</math>: <math>-1.8 \pm 0.7</math></b>                                        |             |                                                                                 |               |                       |
| Genes                                                                                                                                   | Symbol      | Function                                                                        | Fold $\Delta$ | P-value               |
| MW1150                                                                                                                                  | n.a.        | conserved hypothetical protein                                                  | - 1.4         | $2.2 \times 10^{-5}$  |
| MW1151                                                                                                                                  | n.a.        | hypothetical protein; similar to ribosomal protein L7AE family                  | - 1.4         | $5.7 \times 10^{-7}$  |
| MW1152                                                                                                                                  | <i>infB</i> | translation initiation factor IF-2                                              | - 2.8         | $1.2 \times 10^{-32}$ |
| MW1153                                                                                                                                  | <i>rbfA</i> | ribosome-binding factor A (P15B protein)                                        | - 1.6         | $5.0 \times 10^{-9}$  |
| <b>Cluster 31: <i>moe</i> (Molybdopterin Biosynthesis); Average Fold <math>\Delta</math>: <math>-1.8 \pm 0.4</math></b>                 |             |                                                                                 |               |                       |
| Genes                                                                                                                                   | Symbol      | Function                                                                        | Fold $\Delta$ | P-value               |
| MW2191                                                                                                                                  | <i>moeA</i> | molybdopterin biosynthesis protein <i>moeA</i>                                  | - 2.1         | $9.1 \times 10^{-21}$ |
| MW2192                                                                                                                                  | <i>moaC</i> | molybdenum cofactor biosynthesis protein C                                      | - 1.3         | $7.5 \times 10^{-5}$  |
| MW2193                                                                                                                                  | <i>moaB</i> | molybdopterin precursor biosynthesis <i>moaB</i>                                | - 1.8         | $5.6 \times 10^{-19}$ |
| MW2194                                                                                                                                  | <i>moeB</i> | molybdopterin biosynthesis protein <i>moeB</i>                                  | - 1.4         | $3.3 \times 10^{-6}$  |
| MW2195                                                                                                                                  | <i>modC</i> | molybdenum transport ATP-binding protein ModC                                   | - 2.2         | $2.5 \times 10^{-15}$ |
| <b>Cluster 32: Ribosomal Proteins; Average Fold <math>\Delta</math>: <math>-1.7 \pm 0.2</math></b>                                      |             |                                                                                 |               |                       |
| Genes                                                                                                                                   | Symbol      | Function                                                                        | Fold $\Delta$ | P-value               |
| MW2142                                                                                                                                  | <i>rplQ</i> | 50S ribosomal protein L17 (BL15) (BL21)                                         | - 1.8         | $5.4 \times 10^{-15}$ |
| MW2143                                                                                                                                  | <i>rpoA</i> | DNA-directed RNA polymerase alpha chain                                         | - 1.8         | $2.4 \times 10^{-15}$ |
| MW2144                                                                                                                                  | <i>rpsK</i> | 30S ribosomal protein S11 (BS11)                                                | - 1.9         | $2.2 \times 10^{-17}$ |
| MW2145                                                                                                                                  | <i>rpsM</i> | 30S ribosomal protein S13                                                       | - 1.9         | $3.6 \times 10^{-17}$ |
| MW2148                                                                                                                                  | <i>adk</i>  | adenylate kinase                                                                | - 1.6         | $3.7 \times 10^{-9}$  |
| MW2149                                                                                                                                  | <i>secY</i> | preprotein translocase SecY subunit                                             | - 1.7         | $1.9 \times 10^{-13}$ |
| MW2150                                                                                                                                  | <i>rplO</i> | 50S ribosomal protein L15                                                       | - 1.5         | $1.3 \times 10^{-7}$  |

|        |             |                                |       |                         |
|--------|-------------|--------------------------------|-------|-------------------------|
| MW2151 | <i>rpmD</i> | 50S ribosomal protein L30      | - 1.3 | 3.2 x 10 <sup>-4</sup>  |
| MW2152 | <i>rpsE</i> | 30S ribosomal protein S5 (BS5) | - 1.6 | 1.4 x 10 <sup>-8</sup>  |
| MW2153 | <i>rplR</i> | 50S ribosomal protein L18      | - 1.7 | 5.9 x 10 <sup>-13</sup> |
| MW2154 | <i>rplF</i> | 50S ribosomal protein L6       | - 1.9 | 4.8 x 10 <sup>-16</sup> |
| MW2155 | <i>rpsH</i> | 30S ribosomal protein S8 (BS8) | - 1.8 | 2.4 x 10 <sup>-14</sup> |
| MW2157 | <i>rplE</i> | 50S ribosomal protein L5 (BL6) | - 2.0 | 1.1 x 10 <sup>-19</sup> |
| MW2158 | <i>rplX</i> | 50S ribosomal protein L24      | - 1.8 | 1.1 x 10 <sup>-16</sup> |
| MW2159 | <i>rplN</i> | 50S ribosomal protein L14      | - 2.0 | 4.3 x 10 <sup>-19</sup> |
| MW2160 | <i>rpsQ</i> | 30S ribosomal protein S17      | - 1.9 | 9.1 x 10 <sup>-19</sup> |
| MW2161 | <i>rpmC</i> | 50S ribosomal protein L29      | - 1.7 | 2.4 x 10 <sup>-14</sup> |
| MW2162 | <i>rplP</i> | 50S ribosomal protein L16      | - 1.8 | 4.7 x 10 <sup>-14</sup> |
| MW2163 | <i>rpsC</i> | 30S ribosomal protein S3       | - 1.7 | 2.0 x 10 <sup>-12</sup> |
| MW2164 | <i>rplV</i> | 50S ribosomal protein L22      | - 1.8 | 3.8 x 10 <sup>-15</sup> |
| MW2165 | <i>rpsS</i> | 30S ribosomal protein S19      | - 1.8 | 4.9 x 10 <sup>-13</sup> |
| MW2167 | <i>rplW</i> | 50S ribosomal protein L23      | - 1.9 | 7.8 x 10 <sup>-16</sup> |
| MW2168 | <i>rplD</i> | 50S ribosomal protein L4       | - 1.7 | 7.2 x 10 <sup>-13</sup> |
| MW2169 | <i>rplC</i> | 50S ribosomal protein L3 (BL3) | - 1.5 | 8.4 x 10 <sup>-9</sup>  |
| MW2170 | <i>rpsJ</i> | 30S ribosomal protein S10      | - 1.3 | 2.0 x 10 <sup>-3</sup>  |

**Cluster 33: Function Unknown; Average Fold Δ: -1.7 ± 0.3**

| Genes  | Symbol | Function                                             | Fold Δ | P-value                 |
|--------|--------|------------------------------------------------------|--------|-------------------------|
| MW0746 | n.a.   | hypothetical protein [Genomic island nu Sa alpha3mw] | - 1.2  | 1.4 x 10 <sup>-1</sup>  |
| MW0747 | n.a.   | hypothetical protein [Genomic island nu Sa alpha3mw] | - 2.1  | 2.1 x 10 <sup>-12</sup> |
| MW0749 | n.a.   | hypothetical protein [Genomic island nu Sa alpha3mw] | - 2.3  | 9.1 x 10 <sup>-12</sup> |
| MW0750 | n.a.   | hypothetical protein [Genomic island nu Sa alpha3mw] | - 1.9  | 1.7 x 10 <sup>-10</sup> |
| MW0751 | n.a.   | putative primase [Genomic island nu Sa alpha3mw]     | - 1.5  | 1.1 x 10 <sup>-5</sup>  |
| MW0752 | n.a.   | hypothetical protein [Genomic island nu Sa alpha3mw] | - 1.4  | 6.9 x 10 <sup>-4</sup>  |
| MW0753 | n.a.   | hypothetical protein [Genomic island nu Sa alpha3mw] | - 1.7  | 1.8 x 10 <sup>-5</sup>  |
| MW0754 | n.a.   | hypothetical protein [Genomic island nu Sa alpha3mw] | - 1.8  | 3.5 x 10 <sup>-10</sup> |
| MW0755 | n.a.   | hypothetical protein [Genomic island nu Sa alpha3mw] | - 1.8  | 2.1 x 10 <sup>-8</sup>  |

**Cluster 34: *bfm* (Catalyzes Branched Chain Fatty Acid Production); Average Fold Δ: -1.7 ± 0.1**

| Genes  | Symbol        | Function                                        | Fold Δ | P-value                 |
|--------|---------------|-------------------------------------------------|--------|-------------------------|
| MW1469 | <i>bfmBAB</i> | branched-chain alpha-keto acid dehydrogenase E1 | - 1.8  | 9.5 x 10 <sup>-11</sup> |
| MW1470 | <i>bfmBAA</i> | branched-chain alpha-keto acid dehydrogenase E1 | - 1.6  | 8.9 x 10 <sup>-8</sup>  |

**Cluster 35: Function Unknown; Average Fold Δ: -1.7 ± 0.2**

| Genes  | Symbol | Function                                        | Fold Δ | P-value                 |
|--------|--------|-------------------------------------------------|--------|-------------------------|
| MW2111 | n.a.   | glycine betaine transporter opuD homologue      | - 1.5  | 9.2 x 10 <sup>-7</sup>  |
| MW2112 | n.a.   | hypothetical protein; similar to alginate lyase | - 1.9  | 1.8 x 10 <sup>-18</sup> |

**Cluster 36: Uroporphyrinogen III Biosynthesis (Early Heme Biosynthesis); Average Fold Δ: -1.4 ± 1.6**

| Genes  | Symbol      | Function                                 | Fold Δ | P-value                 |
|--------|-------------|------------------------------------------|--------|-------------------------|
| MW1609 | n.a.        | conserved hypothetical protein           | 1.2    | 8.1 x 10 <sup>-3</sup>  |
| MW1611 | <i>hemL</i> | glutamate-1-semialdehyde 2,1-aminomutase | - 2.6  | 7.1 x 10 <sup>-23</sup> |
| MW1612 | <i>hemB</i> | delta-aminolevulinic acid dehydratase    | - 2.5  | 2.5 x 10 <sup>-22</sup> |
| MW1613 | <i>hemD</i> | uroporphyrinogen III synthase            | - 2.1  | 5.2 x 10 <sup>-22</sup> |
| MW1614 | <i>hemC</i> | porphobilinogen deaminase                | - 1.1  | 4.2 x 10 <sup>-1</sup>  |

**Cluster 37: Function Unknown; Average Fold Δ: -1.3 ± 0.2**

| Genes  | Symbol | Function                                                             | Fold Δ | P-value                |
|--------|--------|----------------------------------------------------------------------|--------|------------------------|
| MW2440 | n.a.   | hypothetical protein; similar to transcription regulator MarR family | - 1.5  | 3.8 x 10 <sup>-7</sup> |
| MW2441 | n.a.   | conserved hypothetical protein                                       | - 1.2  | 4.5 x 10 <sup>-2</sup> |
| MW2442 | n.a.   | conserved hypothetical protein                                       | - 1.2  | 2.0 x 10 <sup>-2</sup> |

**Notes:** Significant genes were inserted into WoPPER analysis web tool (<https://wopper.ba.itb.cnr.it/Articles>) with the corresponding log-2 fold change to outcome the gene clusters. All corresponding gene symbols and gene names are retrieved from DOGAN which is a genome database of microorganisms sequenced at NITE (<http://www.bio.nite.go.jp/dogan/top>).

**Supporting Table 8:** KEGG pathway analysis from **HP-14** (20 hours at 0.625  $\mu$ M) treatment of MRSA-1707 biofilms. Gene transcripts that are activated or inhibited ( $\geq 2$ -fold change in transcription of gene products) in MRSA-1707 biofilms by **HP-14** in various pathways are indicated in this analysis.

| <b>sam01100</b> |               |                                                                               | <b>Metabolic Pathways</b>       |                        |
|-----------------|---------------|-------------------------------------------------------------------------------|---------------------------------|------------------------|
| <b>Gene</b>     | <b>Symbol</b> | <b>Function</b>                                                               | <b>Fold <math>\Delta</math></b> | <b>P-value</b>         |
| MW0096          | <i>sbnH</i>   | putative diaminopimelate decarboxylase                                        | 6.2                             | $4.1 \times 10^{-102}$ |
| MW0151          | <i>fdh</i>    | NAD-dependent formate dehydrogenase                                           | 2.5                             | $1.4 \times 10^{-22}$  |
| MW0306          | n.a.          | hypothetical protein; similar to transport protein SgaT                       | 2.4                             | $9.8 \times 10^{-32}$  |
| MW0308          | n.a.          | hypothetical protein; similar to PTS fructose-specific enzyme IIBC component  | 2.1                             | $4.6 \times 10^{-11}$  |
| MW0426          | <i>gltB</i>   | glutamate synthase large subunit                                              | 2.3                             | $3.3 \times 10^{-23}$  |
| MW0427          | <i>gltD</i>   | NADH-glutamate synthase small subunit                                         | 2.6                             | $4.0 \times 10^{-36}$  |
| MW0734          | <i>gap</i>    | glyceraldehyde-3-phosphate dehydrogenase                                      | - 3.7                           | $8.4 \times 10^{-64}$  |
| MW0735          | <i>pgk</i>    | phosphoglycerate kinase                                                       | - 2.2                           | $5.0 \times 10^{-25}$  |
| MW0737          | <i>pgm</i>    | 2,3-diphosphoglycerate-independent phosphoglycerate mutase                    | - 2.2                           | $3.6 \times 10^{-24}$  |
| MW0943          | <i>qoxB</i>   | Quinol oxidase polypeptide I QoxB                                             | - 2.1                           | $3.9 \times 10^{-16}$  |
| MW0944          | n.a.          | hypothetical protein; similar to quinol oxidase polypeptide II QoxA           | - 2.2                           | $4.4 \times 10^{-23}$  |
| MW1051          | n.a.          | hypothetical protein; similar to carbamate kinase                             | 2.0                             | $1.2 \times 10^{-16}$  |
| MW1214          | n.a.          | aspartate kinase homologue                                                    | 2.8                             | $6.0 \times 10^{-48}$  |
| MW1217          | <i>thrB</i>   | homoserine kinase homologue                                                   | 2.1                             | $7.6 \times 10^{-27}$  |
| MW1250          | n.a.          | 4-oxalocrotonate tautomerase                                                  | - 2.4                           | $3.3 \times 10^{-21}$  |
| MW1468          | <i>bmfBB</i>  | branched-chain alpha-keto acid dehydrogenase E2                               | - 2.5                           | $1.8 \times 10^{-21}$  |
| MW1557          | n.a.          | hypothetical protein; similar to acetyl-CoA carboxylase, accB homologue       | 2.1                             | $5.9 \times 10^{-8}$   |
| MW1611          | <i>hemL</i>   | glutamate-1-semialdehyde 2,1-aminomutase                                      | - 2.6                           | $7.1 \times 10^{-23}$  |
| MW1612          | <i>hemB</i>   | delta-aminolevulinic acid dehydratase                                         | - 2.5                           | $2.5 \times 10^{-22}$  |
| MW1613          | <i>hemD</i>   | uroporphyrinogen III synthase                                                 | - 2.3                           | $5.2 \times 10^{-22}$  |
| MW1641          | <i>pykA</i>   | pyruvate kinase                                                               | - 2.8                           | $6.3 \times 10^{-43}$  |
| MW1642          | <i>pfk</i>    | 6-phosphofructokinase                                                         | - 2.4                           | $3.7 \times 10^{-30}$  |
| MW1680          | n.a.          | chorismate mutase homologue                                                   | - 2.4                           | $7.9 \times 10^{-23}$  |
| MW1707          | n.a.          | proline dehydrogenase homologue                                               | 2.2                             | $6.0 \times 10^{-25}$  |
| MW1977          | <i>ilvD</i>   | dihydroxy-acid dehydratase                                                    | 2.1                             | $7.5 \times 10^{-12}$  |
| MW1979          | n.a.          | hypothetical protein; similar to acetolactate synthase small subunit          | 2.7                             | $5.7 \times 10^{-4}$   |
| MW1980          | <i>ilvC</i>   | alpha-keto-beta-hydroxyacyl reductoisomerase                                  | 2.4                             | $1.2 \times 10^{-18}$  |
| MW1981          | <i>leuA</i>   | 2-isopropylmalate synthase                                                    | 2.5                             | $3.5 \times 10^{-22}$  |
| MW1982          | <i>leuB</i>   | 3-isopropylmalate dehydrogenase                                               | 2.2                             | $1.7 \times 10^{-20}$  |
| MW1983          | <i>leuC</i>   | 3-isopropylmalate dehydratase large subunit                                   | 2.6                             | $1.2 \times 10^{-28}$  |
| MW1985          | <i>ilvA</i>   | threonine dehydratase                                                         | 3.0                             | $4.9 \times 10^{-45}$  |
| MW2191          | <i>moeA</i>   | molybdopterin biosynthesis protein moeA                                       | - 2.1                           | $9.1 \times 10^{-21}$  |
| MW2208          | <i>ureC</i>   | urease alpha subunit                                                          | - 2.2                           | $2.1 \times 10^{-32}$  |
| MW2475          | <i>rocA</i>   | 1-pyrroline-5-carboxylate dehydrogenase                                       | 2.1                             | $5.0 \times 10^{-19}$  |
| MW2553          | <i>arcC</i>   | carbamate kinase                                                              | - 2.9                           | $1.5 \times 10^{-17}$  |
| MW2555          | <i>arcB</i>   | ornithine transcarbamoylase                                                   | - 2.1                           | $7.5 \times 10^{-13}$  |
| MW2562          | n.a.          | fructose phosphotransferase system enzyme fruA homologue                      | 3.7                             | $6.3 \times 10^{-53}$  |
| MW2563          | <i>pmi</i>    | mannose-6-phosphate isomerase                                                 | 2.0                             | $6.0 \times 10^{-18}$  |
| <b>sam02010</b> |               |                                                                               | <b>ABC Transporter</b>          |                        |
| <b>Gene</b>     | <b>Symbol</b> | <b>Function</b>                                                               | <b>Fold <math>\Delta</math></b> | <b>P-value</b>         |
| MW0087          | <i>sirB</i>   | iron-regulated ABC transporter siderophore permease protein SirB              | 4.3                             | $1.8 \times 10^{-43}$  |
| MW0088          | <i>sirA</i>   | iron-regulated ABC transporter siderophore-binding protein SirA               | 8.6                             | $6.3 \times 10^{-156}$ |
| MW0191          | n.a.          | maltose/maltodextrin transport permease homologue                             | 4.8                             | $1.2 \times 10^{-76}$  |
| MW0192          | n.a.          | maltose/maltodextrin transport permease homologue                             | 3.4                             | $1.5 \times 10^{-52}$  |
| MW0594          | n.a.          | conserved hypothetical protein                                                | 2.0                             | $1.7 \times 10^{-19}$  |
| MW0595          | n.a.          | hypothetical protein; similar to ABC transporter ATP-binding protein          | 3.8                             | $6.3 \times 10^{-48}$  |
| MW0609          | <i>fhuC</i>   | ferric hydroxamate transport ATP-binding protein                              | 2.6                             | $3.9 \times 10^{-37}$  |
| MW0610          | <i>fhuB</i>   | ferric hydroxamate transport permease                                         | 2.3                             | $7.0 \times 10^{-36}$  |
| MW0695          | n.a.          | hypothetical protein; similar to ferrichrome ABC transporter permease         | 3.7                             | $8.5 \times 10^{-45}$  |
| MW0696          | n.a.          | hypothetical protein; similar to ferrichrome ABC transporter permease         | 3.4                             | $8.3 \times 10^{-33}$  |
| MW0697          | n.a.          | hypothetical pr.; similar to ferrichrome ABC transporter ATP-binding protein  | 2.8                             | $2.5 \times 10^{-27}$  |
| MW0698          | n.a.          | lipoprotein, similar to ferrichrome ABC transporter                           | 2.3                             | $9.1 \times 10^{-20}$  |
| MW0869          | n.a.          | hypothetical pr.; similar, oligopeptide transport syst. permease protein OppC | 2.3                             | $4.9 \times 10^{-13}$  |
| MW0870          | <i>oppD</i>   | oligopeptide transport system ATP-binding protein OppD homologue              | 3.3                             | $4.9 \times 10^{-36}$  |
| MW0871          | <i>oppF</i>   | oligopeptide transport system ATP-binding protein OppF homologue              | 3.6                             | $3.1 \times 10^{-45}$  |



|        |               |                                                                                |       |                        |
|--------|---------------|--------------------------------------------------------------------------------|-------|------------------------|
| MW0872 | n.a.          | hypothetical protein; similar to peptide binding protein OppA                  | 3.0   | $5.2 \times 10^{-37}$  |
| MW0958 | n.a.          | conserved hypothetical protein                                                 | - 2.9 | $1.4 \times 10^{-38}$  |
| MW0959 | n.a.          | hypothetical protein; similar to cation ABC transporter                        | - 2.1 | $5.0 \times 10^{-19}$  |
| MW1015 | <i>isdE</i>   | hypothetical protein; similar to ferrichrome ABC transporter                   | 12.1  | $2.0 \times 10^{-123}$ |
| MW1016 | <i>isdF</i>   | hypothetical protein; similar to ferrichrome ABC transporter                   | 10.5  | $1.4 \times 10^{-120}$ |
| MW1945 | <i>fhuD1</i>  | ferric hydroxamate siderophore binding lipoprotein                             | 5.0   | $2.6 \times 10^{-58}$  |
| MW2102 | n.a.          | hypothetical protein; similar to ferrichrome ABC transporter (permease)        | 3.8   | $9.3 \times 10^{-54}$  |
| MW2103 | n.a.          | hypothetical protein; similar to ferrichrome ABC transporter (binding protein) | 3.9   | $1.0 \times 10^{-67}$  |
| MW2195 | <i>modC</i>   | molybdenum transport ATP-binding protein ModC                                  | - 2.2 | $2.5 \times 10^{-15}$  |
| MW2196 | <i>modB</i>   | probable molybdenum transport permease                                         | - 2.3 | $7.2 \times 10^{-19}$  |
| MW2202 | <i>fhuD2</i>  | ferric hydroxamate siderophore binding lipoprotein                             | 2.5   | $5.3 \times 10^{-31}$  |
| MW2280 | n.a.          | hypothetical protein; similar to ABC transporter, ATP-binding protein          | - 4.3 | $6.9 \times 10^{-99}$  |
| MW2281 | n.a.          | conserved hypothetical protein                                                 | - 4.5 | $1.4 \times 10^{-84}$  |
| MW2387 | <i>opp-1F</i> | oligopeptide transporter putative ATPase domain                                | 5.5   | $3.9 \times 10^{-101}$ |
| MW2388 | <i>opp-1D</i> | oligopeptide transporter putative ATPase domain                                | 7.5   | $3.6 \times 10^{-119}$ |
| MW2389 | <i>opp-1C</i> | oligopeptide transporter putative membrane permease domain                     | 7.8   | $8.1 \times 10^{-126}$ |
| MW2390 | <i>opp-1B</i> | oligopeptide transporter putative membrane permease domain                     | 3.8   | $8.0 \times 10^{-78}$  |
| MW2391 | <i>opp-1A</i> | oligopeptide transporter putative substrate binding domain                     | 4.6   | $9.7 \times 10^{-86}$  |

**sam01110 Biosynthesis of Secondary Metabolites**

| Gene   | Symbol       | Function                                                             | Fold $\Delta$ | P-value                |
|--------|--------------|----------------------------------------------------------------------|---------------|------------------------|
| MW0096 | <i>sbnH</i>  | putative diaminopimelate decarboxylase                               | 6.2           | $4.1 \times 10^{-102}$ |
| MW0426 | <i>gltB</i>  | glutamate synthase large subunit                                     | 2.3           | $3.3 \times 10^{-23}$  |
| MW0427 | <i>gltD</i>  | NADH-glutamate synthase small subunit                                | 2.6           | $4.0 \times 10^{-36}$  |
| MW0734 | <i>gap</i>   | glyceraldehyde-3-phosphate dehydrogenase                             | - 3.7         | $8.4 \times 10^{-64}$  |
| MW0735 | <i>pgk</i>   | phosphoglycerate kinase                                              | - 2.2         | $5.0 \times 10^{-25}$  |
| MW0737 | <i>pgm</i>   | 2,3-diphosphoglycerate-independent phosphoglycerate mutase           | - 2.2         | $3.6 \times 10^{-24}$  |
| MW1018 | <i>isdG</i>  | conserved hypothetical protein                                       | 10.4          | $4.0 \times 10^{-64}$  |
| MW1214 | n.a.         | aspartate kinase homologue                                           | 2.8           | $6.0 \times 10^{-48}$  |
| MW1217 | <i>thrB</i>  | homoserine kinase homologue                                          | 2.1           | $7.6 \times 10^{-27}$  |
| MW1468 | <i>bmfBB</i> | branched-chain alpha-keto acid dehydrogenase E2                      | - 2.5         | $1.8 \times 10^{-21}$  |
| MW1557 | n.a.         | hypothetical protein, similar to acetyl-CoA carboxylase              | 2.1           | $5.9 \times 10^{-8}$   |
| MW1611 | <i>hemL</i>  | glutamate-1-semialdehyde 2,1-aminomutase                             | - 2.6         | $7.1 \times 10^{-23}$  |
| MW1612 | <i>hemB</i>  | delta-aminolevulinic acid hydratase                                  | - 2.5         | $2.5 \times 10^{-22}$  |
| MW1613 | <i>hemD</i>  | uroporphyrinogen III synthase                                        | - 2.3         | $5.2 \times 10^{-22}$  |
| MW1641 | <i>pykA</i>  | pyruvate kinase                                                      | - 2.8         | $6.3 \times 10^{-43}$  |
| MW1642 | <i>pfk</i>   | 6-phosphofructokinase                                                | - 2.4         | $3.7 \times 10^{-30}$  |
| MW1680 | n.a.         | chorismate mutase homologue                                          | - 2.4         | $7.9 \times 10^{-23}$  |
| MW1707 | n.a.         | proline dehydrogenase homologue                                      | 2.2           | $6.0 \times 10^{-25}$  |
| MW1977 | <i>ilvD</i>  | dihydroxy-acid hydratase                                             | 2.1           | $7.5 \times 10^{-12}$  |
| MW1979 | n.a.         | hypothetical protein; similar to acetolactate synthase small subunit | 2.7           | $5.7 \times 10^{-4}$   |
| MW1980 | <i>ilvC</i>  | alpha-keto-beta-hydroxyacyl reductoisomerase                         | 2.4           | $1.2 \times 10^{-18}$  |
| MW1981 | <i>leuA</i>  | 2-isopropylmalate synthase                                           | 2.5           | $3.5 \times 10^{-22}$  |
| MW1982 | <i>leuB</i>  | 3-isopropylmalate dehydrogenase                                      | 2.2           | $1.7 \times 10^{-20}$  |
| MW1983 | <i>leuC</i>  | 3-isopropylmalate hydratase large subunit                            | 2.6           | $1.2 \times 10^{-28}$  |
| MW1985 | <i>ilvA</i>  | threonine hydratase                                                  | 3.0           | $4.9 \times 10^{-45}$  |
| MW2555 | <i>arcB</i>  | ornithine transcarbamoylase                                          | - 2.0         | $7.5 \times 10^{-13}$  |
| MW2563 | <i>pmi</i>   | mannose-6-phosphate isomerase                                        | 2.0           | $6.0 \times 10^{-18}$  |

**sam01120 Microbial Metabolism in Diverse Environments**

| Gene   | Symbol      | Function                                                                     | Fold $\Delta$ | P-value                |
|--------|-------------|------------------------------------------------------------------------------|---------------|------------------------|
| MW0096 | <i>sbnH</i> | putative diaminopimelate decarboxylase                                       | 6.2           | $4.1 \times 10^{-102}$ |
| MW0151 | <i>fdh</i>  | NAD-dependent formate dehydrogenase                                          | 2.5           | $1.4 \times 10^{-22}$  |
| MW0306 | n.a.        | hypothetical protein; similar to transport protein SgaT                      | 2.4           | $9.8 \times 10^{-32}$  |
| MW0308 | n.a.        | hypothetical protein; similar to PTS fructose-specific enzyme IIBC component | 2.1           | $4.6 \times 10^{-11}$  |
| MW0426 | <i>gltB</i> | glutamate synthase large subunit                                             | 2.3           | $3.3 \times 10^{-23}$  |
| MW0427 | <i>gltD</i> | NADH-glutamate synthase small subunit                                        | 2.6           | $4.0 \times 10^{-36}$  |
| MW0734 | <i>gap</i>  | glyceraldehyde-3-phosphate dehydrogenase                                     | - 3.7         | $8.4 \times 10^{-64}$  |
| MW0735 | <i>pgk</i>  | phosphoglycerate kinase                                                      | - 2.2         | $5.0 \times 10^{-25}$  |
| MW0737 | <i>pgm</i>  | 2,3-diphosphoglycerate-independent phosphoglycerate mutase                   | - 2.2         | $3.6 \times 10^{-24}$  |
| MW1051 | n.a.        | hypothetical protein, similar to carbamate kinase                            | 2.0           | $1.2 \times 10^{-16}$  |
| MW1214 | n.a.        | aspartate kinase homologue                                                   | 2.8           | $6.0 \times 10^{-48}$  |
| MW1217 | <i>thrB</i> | homoserine kinase homologue                                                  | 2.1           | $7.6 \times 10^{-27}$  |
| MW1250 | n.a.        | 4-oxalocrotonate tautomerase                                                 | - 2.4         | $3.3 \times 10^{-21}$  |

| MW1557                                      | n.a.         | hypothetical protein; similar to acetyl-CoA carboxylase              | 2.1    | 5.9 x 10 <sup>-8</sup>   |
|---------------------------------------------|--------------|----------------------------------------------------------------------|--------|--------------------------|
| MW1611                                      | <i>hemL</i>  | glutamate-1-semialdehyde 2,1-aminomutase                             | - 2.6  | 7.1 x 10 <sup>-23</sup>  |
| MW1612                                      | <i>hemB</i>  | delta-aminolevulinic acid dehydratase                                | - 2.5  | 2.5 x 10 <sup>-22</sup>  |
| MW1613                                      | <i>hemD</i>  | uroporphyrinogen III synthase                                        | - 2.3  | 5.2 x 10 <sup>-22</sup>  |
| MW1641                                      | <i>pykA</i>  | pyruvate kinase                                                      | - 2.8  | 6.3 x 10 <sup>-43</sup>  |
| MW1642                                      | <i>pfk</i>   | 6-phosphofructokinase                                                | - 2.4  | 3.7 x 10 <sup>-30</sup>  |
| MW2208                                      | <i>ureC</i>  | urease alpha subunit                                                 | - 2.2  | 2.1 x 10 <sup>-32</sup>  |
| MW2444                                      | <i>ddh</i>   | D-specific D-2-hydroxyacid dehydrogenase                             | - 2.3  | 1.3 x 10 <sup>-27</sup>  |
| MW2553                                      | <i>arcC</i>  | carbamate kinase                                                     | - 2.9  | 1.5 x 10 <sup>-17</sup>  |
| MW2562                                      | n.a.         | fructose phosphotransferase system enzyme fruA homologue             | 3.7    | 6.3 x 10 <sup>-53</sup>  |
| <b>sam01130 Biosynthesis of Antibiotics</b> |              |                                                                      |        |                          |
| Gene                                        | Symbol       | Function                                                             | Fold Δ | P-value                  |
| MW0096                                      | <i>sbnH</i>  | putative diaminopimelate decarboxylase                               | 6.2    | 4.1 x 10 <sup>-102</sup> |
| MW0426                                      | <i>gltB</i>  | glutamate synthase large subunit                                     | 2.3    | 3.3 x 10 <sup>-23</sup>  |
| MW0427                                      | <i>gltD</i>  | NADH-glutamate synthase small subunit                                | 2.6    | 4.0 x 10 <sup>-36</sup>  |
| MW0734                                      | <i>gap</i>   | glyceraldehyde-3-phosphate dehydrogenase                             | - 3.7  | 8.4 x 10 <sup>-64</sup>  |
| MW0735                                      | <i>pgk</i>   | phosphoglycerate kinase                                              | - 2.2  | 5.0 x 10 <sup>-25</sup>  |
| MW0737                                      | <i>pgm</i>   | 2,3-diphosphoglycerate-independent phosphoglycerate mutase           | - 2.2  | 3.6 x 10 <sup>-24</sup>  |
| MW1214                                      | n.a.         | aspartate kinase homologue                                           | 2.8    | 6.0 x 10 <sup>-48</sup>  |
| MW1468                                      | <i>bmfBB</i> | branched-chain alpha-keto acid dehydrogenase E2                      | - 2.5  | 1.8 x 10 <sup>-21</sup>  |
| MW1557                                      | n.a.         | hypothetical protein; similar to acetyl-CoA carboxylase              | 2.1    | 5.9 x 10 <sup>-8</sup>   |
| MW1641                                      | <i>pykA</i>  | pyruvate kinase                                                      | - 2.8  | 6.3 x 10 <sup>-43</sup>  |
| MW1642                                      | <i>pfk</i>   | 6-phosphofructokinase                                                | - 2.4  | 3.7 x 10 <sup>-30</sup>  |
| MW1680                                      | n.a.         | chorismate mutase homologue                                          | - 2.4  | 7.9 x 10 <sup>-23</sup>  |
| MW1707                                      | n.a.         | proline dehydrogenase homologue                                      | 2.2    | 6.0 x 10 <sup>-25</sup>  |
| MW1977                                      | <i>ilvD</i>  | dihydroxy-acid dehydratase                                           | 2.1    | 7.5 x 10 <sup>-12</sup>  |
| MW1979                                      | n.a.         | hypothetical protein; similar to acetolactate synthase small subunit | 2.7    | 5.7 x 10 <sup>-4</sup>   |
| MW1980                                      | <i>ilvC</i>  | alpha-keto-beta-hydroxyacyl reductoisomerase                         | 2.4    | 1.2 x 10 <sup>-18</sup>  |
| MW1985                                      | <i>ilvA</i>  | threonine dehydratase                                                | 3.0    | 4.9 x 10 <sup>-45</sup>  |
| MW2555                                      | <i>arcB</i>  | ornithine transcarbamoylase                                          | - 2.1  | 7.5 x 10 <sup>-13</sup>  |
| MW2563                                      | <i>pmi</i>   | mannose-6-phosphate isomerase                                        | 2.0    | 6.0 x 10 <sup>-18</sup>  |
| <b>sam01230 Biosynthesis of Amino Acids</b> |              |                                                                      |        |                          |
| Gene                                        | Symbol       | Function                                                             | Fold Δ | P-value                  |
| MW0096                                      | <i>sbnH</i>  | putative diaminopimelate decarboxylase                               | 6.2    | 4.1 x 10 <sup>-102</sup> |
| MW0426                                      | <i>gltB</i>  | glutamate synthase large subunit                                     | 2.3    | 3.3 x 10 <sup>-23</sup>  |
| MW0427                                      | <i>gltD</i>  | NADH-glutamate synthase small subunit                                | 2.6    | 4.0 x 10 <sup>-36</sup>  |
| MW0734                                      | <i>gap</i>   | glyceraldehyde-3-phosphate dehydrogenase                             | - 3.7  | 8.4 x 10 <sup>-64</sup>  |
| MW0735                                      | <i>pgk</i>   | phosphoglycerate kinase                                              | - 2.2  | 5.0 x 10 <sup>-25</sup>  |
| MW0737                                      | <i>pgm</i>   | 2,3-diphosphoglycerate-independent phosphoglycerate mutase           | - 2.2  | 3.6 x 10 <sup>-24</sup>  |
| MW1214                                      | n.a.         | aspartate kinase homologue                                           | 2.8    | 6.0 x 10 <sup>-48</sup>  |
| MW1217                                      | <i>thrB</i>  | homoserine kinase homologue                                          | 2.1    | 7.6 x 10 <sup>-27</sup>  |
| MW1641                                      | <i>pykA</i>  | pyruvate kinase                                                      | - 2.8  | 6.3 x 10 <sup>-43</sup>  |
| MW1642                                      | <i>pfk</i>   | 6-phosphofructokinase                                                | - 2.4  | 3.7 x 10 <sup>-30</sup>  |
| MW1680                                      | n.a.         | chorismate mutase homologue                                          | - 2.4  | 7.9 x 10 <sup>-23</sup>  |
| MW1977                                      | <i>ilvD</i>  | dihydroxy-acid dehydratase                                           | 2.1    | 7.5 x 10 <sup>-12</sup>  |
| MW1979                                      | n.a.         | hypothetical protein; similar to acetolactate synthase small subunit | 2.7    | 5.7 x 10 <sup>-4</sup>   |
| MW1980                                      | <i>ilvC</i>  | alpha-keto-beta-hydroxyacyl reductoisomerase                         | 2.4    | 1.2 x 10 <sup>-18</sup>  |
| MW1981                                      | <i>leuA</i>  | 2-isopropylmalate synthase                                           | 2.5    | 3.5 x 10 <sup>-22</sup>  |
| MW1982                                      | <i>leuB</i>  | 3-isopropylmalate dehydrogenase                                      | 2.2    | 1.7 x 10 <sup>-20</sup>  |
| MW1983                                      | <i>leuC</i>  | 3-isopropylmalate dehydratase large subunit                          | 2.6    | 1.2 x 10 <sup>-28</sup>  |
| MW1985                                      | <i>ilvA</i>  | threonine dehydratase                                                | 3.0    | 4.9 x 10 <sup>-45</sup>  |
| MW2555                                      | <i>arcB</i>  | ornithine transcarbamoylase                                          | - 2.1  | 7.5 x 10 <sup>-13</sup>  |
| <b>sam01200 Carbon Metabolism</b>           |              |                                                                      |        |                          |
| Gene                                        | Symbol       | Function                                                             | Fold Δ | P-value                  |
| MW0151                                      | <i>fdh</i>   | NAD-dependent formate dehydrogenase                                  | 2.5    | 1.4 x 10 <sup>-22</sup>  |
| MW0734                                      | <i>gap</i>   | glyceraldehyde-3-phosphate dehydrogenase                             | - 3.7  | 8.4 x 10 <sup>-64</sup>  |
| MW0735                                      | <i>pgk</i>   | phosphoglycerate kinase                                              | - 2.2  | 5.0 x 10 <sup>-25</sup>  |
| MW0737                                      | <i>pgm</i>   | 2,3-diphosphoglycerate-independent phosphoglycerate mutase           | - 2.2  | 3.6 x 10 <sup>-24</sup>  |
| MW1051                                      | n.a.         | hypothetical protein; similar to carbamate kinase                    | 2.0    | 1.2 x 10 <sup>-16</sup>  |
| MW1557                                      | n.a.         | hypothetical protein; similar to acetyl-CoA carboxylase              | 2.1    | 5.9 x 10 <sup>-8</sup>   |
| MW1641                                      | <i>pykA</i>  | pyruvate kinase                                                      | - 2.8  | 6.3 x 10 <sup>-43</sup>  |

| MW1642                                                        | <i>pfk</i>  | 6-phosphofructokinase                                                            | - 2.4  | 3.7 x 10 <sup>-30</sup>  |
|---------------------------------------------------------------|-------------|----------------------------------------------------------------------------------|--------|--------------------------|
| MW1985                                                        | <i>ilvA</i> | threonine dehydratase                                                            | 3.0    | 4.9 x 10 <sup>-45</sup>  |
| MW2553                                                        | <i>arcC</i> | carbamate kinase                                                                 | -2.9   | 1.5 x 10 <sup>-17</sup>  |
| <b>sam02024 Quorum Sensing</b>                                |             |                                                                                  |        |                          |
| Gene                                                          | Symbol      | Function                                                                         | Fold Δ | P-value                  |
| MW0869                                                        | n.a.        | hypothetical pr.; similar, oligopeptide transport syst. permease protein OppC    | 2.3    | 4.9 x 10 <sup>-13</sup>  |
| MW0870                                                        | <i>oppD</i> | oligopeptide transport system ATP-binding protein OppD homologue                 | 3.3    | 4.9 x 10 <sup>-36</sup>  |
| MW0871                                                        | <i>oppF</i> | oligopeptide transport system ATP-binding protein OppF homologue                 | 3.6    | 3.1 x 10 <sup>-45</sup>  |
| MW0872                                                        | n.a.        | hypothetical protein; similar to peptide binding protein OppA                    | 3.0    | 5.2 x 10 <sup>-37</sup>  |
| MW1752                                                        | <i>splF</i> | serine protease SplF                                                             | 7.4    | 3.4 x 10 <sup>-131</sup> |
| MW1763                                                        | <i>bsaC</i> | hypothetical protein; similar to lantibiotic epidermin biosynthesis protein EpiC | - 2.7  | 1.2 x 10 <sup>-26</sup>  |
| MW1764                                                        | <i>bsaB</i> | hypothetical protein; similar to lantibiotic epidermin biosynthesis protein EpiB | - 2.0  | 5.7 x 10 <sup>-23</sup>  |
| MW1963                                                        | <i>agrA</i> | accessory gene regulator A                                                       | - 2.1  | 7.3 x 10 <sup>-13</sup>  |
| <b>sam01210 2-Oxocarboxylic Acid Metabolism</b>               |             |                                                                                  |        |                          |
| Gene                                                          | Symbol      | Function                                                                         | Fold Δ | P-value                  |
| MW1214                                                        | n.a.        | aspartate kinase homologue                                                       | 2.8    | 6.0 x 10 <sup>-48</sup>  |
| MW1977                                                        | <i>ilvD</i> | dihydroxy-acid dehydratase                                                       | 2.1    | 7.5 x 10 <sup>-12</sup>  |
| MW1979                                                        | n.a.        | hypothetical protein; similar to acetolactate synthase small subunit             | 2.7    | 5.7 x 10 <sup>-4</sup>   |
| MW1980                                                        | <i>ilvC</i> | alpha-keto-beta-hydroxyacyl reductoisomerase                                     | 2.4    | 1.2 x 10 <sup>-18</sup>  |
| MW1981                                                        | <i>leuA</i> | 2-isopropylmalate synthase                                                       | 2.5    | 3.5 x 10 <sup>-22</sup>  |
| MW1982                                                        | <i>leuB</i> | 3-isopropylmalate dehydrogenase                                                  | 2.2    | 1.7 x 10 <sup>-20</sup>  |
| MW1983                                                        | <i>leuC</i> | 3-isopropylmalate dehydratase large subunit                                      | 2.6    | 1.2 x 10 <sup>-28</sup>  |
| <b>sam00290 Valine, Leucine &amp; Isoleucine Biosynthesis</b> |             |                                                                                  |        |                          |
| Gene                                                          | Symbol      | Function                                                                         | Fold Δ | P-value                  |
| MW1977                                                        | <i>ilvD</i> | dihydroxy-acid dehydratase                                                       | 2.1    | 7.5 x 10 <sup>-12</sup>  |
| MW1979                                                        | n.a.        | hypothetical protein; similar to acetolactate synthase small subunit             | 2.7    | 5.7 x 10 <sup>-4</sup>   |
| MW1980                                                        | <i>ilvC</i> | alpha-keto-beta-hydroxyacyl reductoisomerase                                     | 2.4    | 1.2 x 10 <sup>-18</sup>  |
| MW1981                                                        | <i>leuA</i> | 2-isopropylmalate synthase                                                       | 2.5    | 3.5 x 10 <sup>-22</sup>  |
| MW1982                                                        | <i>leuB</i> | 3-isopropylmalate dehydrogenase                                                  | 2.2    | 1.7 x 10 <sup>-20</sup>  |
| MW1983                                                        | <i>leuC</i> | 3-isopropylmalate dehydratase large subunit                                      | 2.6    | 1.2 x 10 <sup>-28</sup>  |
| MW1985                                                        | <i>ilvA</i> | threonine dehydratase                                                            | 3.0    | 4.9 x 10 <sup>-45</sup>  |
| <b>sam02060 Phosphotransferase System (PTS)</b>               |             |                                                                                  |        |                          |
| Gene                                                          | Symbol      | Function                                                                         | Fold Δ | P-value                  |
| MW0166                                                        | n.a.        | hypothetical protein; similar to sucrose phosphotransferase enzyme II            | 2.0    | 1.3 x 10 <sup>-16</sup>  |
| MW0306                                                        | n.a.        | hypothetical protein; similar to transport protein SgaT                          | 2.4    | 9.8 x 10 <sup>-32</sup>  |
| MW0308                                                        | n.a.        | hypothetical protein; similar to PTS fructose-specific enzyme IIBC component     | 2.1    | 4.6 x 10 <sup>-11</sup>  |
| MW0428                                                        | <i>treP</i> | PTS enzyme II                                                                    | 2.1    | 1.1 x 10 <sup>-21</sup>  |
| MW2562                                                        | n.a.        | fructose phosphotransferase system enzyme fruA homologue                         | 3.7    | 6.3 x 10 <sup>-53</sup>  |
| <b>sam00010 Glycolysis / Gluconeogenesis</b>                  |             |                                                                                  |        |                          |
| Gene                                                          | Symbol      | Function                                                                         | Fold Δ | P-value                  |
| MW0734                                                        | <i>gap</i>  | glyceraldehyde-3-phosphate dehydrogenase                                         | - 3.7  | 8.4 x 10 <sup>-64</sup>  |
| MW0735                                                        | <i>pgk</i>  | phosphoglycerate kinase                                                          | - 2.2  | 5.0 x 10 <sup>-25</sup>  |
| MW0737                                                        | <i>pgm</i>  | 2,3-diphosphoglycerate-independent phosphoglycerate mutase                       | - 2.2  | 3.6 x 10 <sup>-24</sup>  |
| MW1641                                                        | <i>pykA</i> | pyruvate kinase                                                                  | - 2.8  | 6.3 x 10 <sup>-43</sup>  |
| MW1642                                                        | <i>pfk</i>  | 6-phosphofructokinase                                                            | - 2.4  | 3.7 x 10 <sup>-30</sup>  |
| <b>sam00230 Purine Metabolism</b>                             |             |                                                                                  |        |                          |
| Gene                                                          | Symbol      | Function                                                                         | Fold Δ | P-value                  |
| MW0113                                                        | <i>drm</i>  | phosphopentomutase                                                               | - 2.2  | 3.3 x 10 <sup>-20</sup>  |
| MW1051                                                        | n.a.        | hypothetical protein; similar to carbamate kinase                                | 2.0    | 1.2 x 10 <sup>-16</sup>  |
| MW1641                                                        | <i>pykA</i> | pyruvate kinase                                                                  | - 2.8  | 6.3 x 10 <sup>-43</sup>  |
| MW2208                                                        | <i>ureC</i> | urease alpha subunit                                                             | - 2.2  | 2.1 x 10 <sup>-32</sup>  |
| MW2553                                                        | <i>arcC</i> | carbamate kinase                                                                 | - 2.9  | 1.5 x 10 <sup>-17</sup>  |
| <b>sam00860 Porphyrin &amp; Chlorophyll Metabolism</b>        |             |                                                                                  |        |                          |
| Gene                                                          | Symbol      | Function                                                                         | Fold Δ | P-value                  |
| MW1018                                                        | <i>isdG</i> | conserved hypothetical protein                                                   | 10.4   | 4.0 x 10 <sup>-64</sup>  |
| MW1611                                                        | <i>hemL</i> | glutamate-1-semialdehyde 2,1-aminomutase                                         | - 2.6  | 7.1 x 10 <sup>-23</sup>  |
| MW1612                                                        | <i>hemB</i> | delta-aminolevulinic acid dehydratase                                            | - 2.5  | 2.5 x 10 <sup>-22</sup>  |
| MW1613                                                        | <i>hemD</i> | uroporphyrinogen III synthase                                                    | - 2.3  | 5.2 x 10 <sup>-22</sup>  |
| <b>sam02020 Two-Component System</b>                          |             |                                                                                  |        |                          |
| Gene                                                          | Symbol      | Function                                                                         | Fold Δ | P-value                  |
| MW0198                                                        | n.a.        | hypothetical protein; similar to two-component response regulator                | - 2.2  | 1.6 x 10 <sup>-20</sup>  |

|                                                               |               |                                                                                  |               |                          |
|---------------------------------------------------------------|---------------|----------------------------------------------------------------------------------|---------------|--------------------------|
| MW1763                                                        | <i>bsaC</i>   | hypothetical protein; similar to lantibiotic epidermin biosynthesis protein EpiC | - 2.7         | 1.2 x 10 <sup>-26</sup>  |
| MW1764                                                        | <i>bsaB</i>   | hypothetical protein; similar to lantibiotic epidermin biosynthesis protein EpiB | - 2.0         | 5.7 x 10 <sup>-23</sup>  |
| MW1963                                                        | <i>agrA</i>   | accessory gene regulator A                                                       | - 2.1         | 7.3 x 10 <sup>-13</sup>  |
| <b>sam00620 Pyruvate Metabolism</b>                           |               |                                                                                  |               |                          |
| <b>Gene</b>                                                   | <b>Symbol</b> | <b>Function</b>                                                                  | <b>Fold Δ</b> | <b>P-value</b>           |
| MW1557                                                        | n.a.          | hypothetical protein; similar to acetyl-CoA carboxylase                          | 2.1           | 5.9 x 10 <sup>-8</sup>   |
| MW1641                                                        | <i>pykA</i>   | pyruvate kinase                                                                  | - 2.8         | 6.3 x 10 <sup>-43</sup>  |
| MW1981                                                        | <i>leuA</i>   | 2-isopropylmalate synthase                                                       | 2.5           | 3.5 x 10 <sup>-22</sup>  |
| MW2444                                                        | <i>ddh</i>    | D-specific D-2-hydroxyacid dehydrogenase                                         | - 2.3         | 1.3 x 10 <sup>-27</sup>  |
| <b>sam00910 Nitrogen Metabolism</b>                           |               |                                                                                  |               |                          |
| <b>Gene</b>                                                   | <b>Symbol</b> | <b>Function</b>                                                                  | <b>Fold Δ</b> | <b>P-value</b>           |
| MW0426                                                        | <i>gltB</i>   | glutamate synthase large subunit                                                 | 2.3           | 3.3 x 10 <sup>-23</sup>  |
| MW0427                                                        | <i>gltD</i>   | NADH-glutamate synthase small subunit                                            | 2.6           | 4.0 x 10 <sup>-36</sup>  |
| MW1051                                                        | n.a.          | hypothetical protein; similar to carbamate kinase                                | 2.0           | 1.2 x 10 <sup>-16</sup>  |
| MW2553                                                        | <i>arcC</i>   | carbamate kinase                                                                 | -2.9          | 1.5 x 10 <sup>-17</sup>  |
| <b>sam00220 Arginine Biosynthesis</b>                         |               |                                                                                  |               |                          |
| <b>Gene</b>                                                   | <b>Symbol</b> | <b>Function</b>                                                                  | <b>Fold Δ</b> | <b>P-value</b>           |
| MW1051                                                        | n.a.          | hypothetical protein; similar to carbamate kinase                                | 2.0           | 1.2 x 10 <sup>-16</sup>  |
| MW2208                                                        | <i>ureC</i>   | urease alpha subunit                                                             | - 2.2         | 2.1 x 10 <sup>-32</sup>  |
| MW2553                                                        | <i>arcC</i>   | carbamate kinase                                                                 | - 2.9         | 1.5 x 10 <sup>-17</sup>  |
| MW2555                                                        | <i>arcB</i>   | ornithine transcarbamoylase                                                      | - 2.1         | 7.5 x 10 <sup>-13</sup>  |
| <b>sam01501 Beta-Lactam Resistance</b>                        |               |                                                                                  |               |                          |
| <b>Gene</b>                                                   | <b>Symbol</b> | <b>Function</b>                                                                  | <b>Fold Δ</b> | <b>P-value</b>           |
| MW0869                                                        | n.a.          | hypothetical pr.; similar, oligopeptide transport syst. permease protein OppC    | 2.3           | 4.9 x 10 <sup>-13</sup>  |
| MW0870                                                        | <i>oppD</i>   | oligopeptide transport system ATP-binding protein OppD homologue                 | 3.3           | 4.9 x 10 <sup>-36</sup>  |
| MW0871                                                        | <i>oppF</i>   | oligopeptide transport system ATP-binding protein OppF homologue                 | 3.6           | 3.1 x 10 <sup>-45</sup>  |
| MW0872                                                        | n.a.          | hypothetical protein; similar to peptide binding protein OppA                    | 3.0           | 5.2 x 10 <sup>-37</sup>  |
| <b>sam00260 Glycine, Serine &amp; Threonine Metabolism</b>    |               |                                                                                  |               |                          |
| <b>Gene</b>                                                   | <b>Symbol</b> | <b>Function</b>                                                                  | <b>Fold Δ</b> | <b>P-value</b>           |
| MW0737                                                        | <i>pgm</i>    | 2,3-diphosphoglycerate-independent phosphoglycerate mutase                       | - 2.2         | 3.6 x 10 <sup>-24</sup>  |
| MW1214                                                        | n.a.          | aspartate kinase homologue                                                       | 2.8           | 6.0 x 10 <sup>-48</sup>  |
| MW1217                                                        | <i>thrB</i>   | homoserine kinase homologue                                                      | 2.1           | 7.6 x 10 <sup>-27</sup>  |
| MW1985                                                        | <i>ilvA</i>   | threonine dehydratase                                                            | 3.0           | 4.9 x 10 <sup>-45</sup>  |
| <b>sam00660 C5-Branched Dibasic Acid Metabolism</b>           |               |                                                                                  |               |                          |
| <b>Gene</b>                                                   | <b>Symbol</b> | <b>Function</b>                                                                  | <b>Fold Δ</b> | <b>P-value</b>           |
| MW1979                                                        | n.a.          | hypothetical protein; similar to acetolactate synthase small subunit             | 2.7           | 5.7 x 10 <sup>-4</sup>   |
| MW1982                                                        | <i>leuB</i>   | 3-isopropylmalate dehydrogenase                                                  | 2.2           | 1.7 x 10 <sup>-20</sup>  |
| MW1983                                                        | <i>leuC</i>   | 3-isopropylmalate dehydratase large subunit                                      | 2.6           | 1.2 x 10 <sup>-28</sup>  |
| <b>sam00680 Methane Metabolism</b>                            |               |                                                                                  |               |                          |
| <b>Gene</b>                                                   | <b>Symbol</b> | <b>Function</b>                                                                  | <b>Fold Δ</b> | <b>P-value</b>           |
| MW0151                                                        | <i>fdh</i>    | NAD-dependent formate dehydrogenase                                              | 2.5           | 1.4 x 10 <sup>-22</sup>  |
| MW0737                                                        | <i>pgm</i>    | 2,3-diphosphoglycerate-independent phosphoglycerate mutase                       | - 2.2         | 3.6 x 10 <sup>-24</sup>  |
| MW1642                                                        | <i>pfk</i>    | 6-phosphofructokinase                                                            | - 2.4         | 3.7 x 10 <sup>-30</sup>  |
| <b>sam00250 Alanine, Aspartate &amp; Glutamate Metabolism</b> |               |                                                                                  |               |                          |
| <b>Gene</b>                                                   | <b>Symbol</b> | <b>Function</b>                                                                  | <b>Fold Δ</b> | <b>P-value</b>           |
| MW0426                                                        | <i>gltB</i>   | glutamate synthase large subunit                                                 | 2.3           | 3.3 x 10 <sup>-23</sup>  |
| MW0427                                                        | <i>gltD</i>   | NADH-glutamate synthase small subunit                                            | 2.6           | 4.0 x 10 <sup>-36</sup>  |
| MW2475                                                        | <i>rocA</i>   | 1-pyrroline-5-carboxylate dehydrogenase                                          | 2.1           | 5.0 x 10 <sup>-19</sup>  |
| <b>sam05150 Staphylococcus aureus Infection</b>               |               |                                                                                  |               |                          |
| <b>Gene</b>                                                   | <b>Symbol</b> | <b>Function</b>                                                                  | <b>Fold Δ</b> | <b>P-value</b>           |
| MW0759                                                        | <i>sec4</i>   | enterotoxin type C precursor                                                     | 2.0           | 1.3 x 10 <sup>-16</sup>  |
| MW1012                                                        | <i>isdA</i>   | cell surface protein                                                             | 10.4          | 2.3 x 10 <sup>-121</sup> |
| MW1768                                                        | <i>lukE</i>   | leukotoxin Luke                                                                  | 2.2           | 4.9 x 10 <sup>-10</sup>  |
| <b>sam00770 Pantothenate &amp; CoA Biosynthesis</b>           |               |                                                                                  |               |                          |
| <b>Gene</b>                                                   | <b>Symbol</b> | <b>Function</b>                                                                  | <b>Fold Δ</b> | <b>P-value</b>           |
| MW1977                                                        | <i>ilvD</i>   | dihydroxy-acid dehydratase                                                       | 2.1           | 7.5 x 10 <sup>-12</sup>  |
| MW1979                                                        | n.a.          | hypothetical protein; similar to acetolactate synthase small subunit             | 2.7           | 5.7 x 10 <sup>-4</sup>   |
| MW1980                                                        | <i>ilvC</i>   | alpha-keto-beta-hydroxyacyl reductoisomerase                                     | 2.4           | 1.2 x 10 <sup>-18</sup>  |
| <b>sam00051 Fructose &amp; Mannose Metabolism</b>             |               |                                                                                  |               |                          |

| Gene                                                          | Symbol       | Function                                                                     | Fold $\Delta$ | P-value                |
|---------------------------------------------------------------|--------------|------------------------------------------------------------------------------|---------------|------------------------|
| MW1642                                                        | <i>pfk</i>   | 6-phosphofructokinase                                                        | - 2.4         | $3.7 \times 10^{-30}$  |
| MW2562                                                        | n.a.         | fructose phosphotransferase system enzyme fruA homologue                     | 3.7           | $6.3 \times 10^{-53}$  |
| MW2563                                                        | <i>pmi</i>   | mannose-6-phosphate isomerase                                                | 2.0           | $6.0 \times 10^{-18}$  |
| <b>sam00500 Starch &amp; Sucrose Metabolism</b>               |              |                                                                              |               |                        |
| Gene                                                          | Symbol       | Function                                                                     | Fold $\Delta$ | P-value                |
| MW0166                                                        | n.a.         | hypothetical protein; similar to sucrose phosphotransferase enzyme II        | 2.0           | $1.3 \times 10^{-16}$  |
| MW0428                                                        | <i>treP</i>  | PTS enzyme II                                                                | 2.1           | $1.1 \times 10^{-21}$  |
| MW0429                                                        | n.a.         | alpha-glucosidase                                                            | 2.7           | $5.2 \times 10^{-34}$  |
| <b>sam00520 Amino Sugar &amp; Nucleotide Sugar Metabolism</b> |              |                                                                              |               |                        |
| Gene                                                          | Symbol       | Function                                                                     | Fold $\Delta$ | P-value                |
| MW0292                                                        | <i>nanA</i>  | N-acetylneuraminase lyase subunit                                            | 2.7           | $3.4 \times 10^{-29}$  |
| MW2563                                                        | <i>pmi</i>   | mannose-6-phosphate isomerase                                                | 2.0           | $6.0 \times 10^{-18}$  |
| <b>sam00030 Pentose Phosphate Pathway</b>                     |              |                                                                              |               |                        |
| Gene                                                          | Symbol       | Function                                                                     | Fold $\Delta$ | P-value                |
| MW0113                                                        | <i>drm</i>   | phosphopentomutase                                                           | - 2.2         | $3.3 \times 10^{-20}$  |
| MW1642                                                        | <i>pfk</i>   | 6-phosphofructokinase                                                        | - 2.4         | $3.7 \times 10^{-30}$  |
| <b>sam03030 DNA Replication</b>                               |              |                                                                              |               |                        |
| Gene                                                          | Symbol       | Function                                                                     | Fold $\Delta$ | P-value                |
| MW0016                                                        | <i>dnaC</i>  | replicative DNA helicase                                                     | - 2.4         | $5.2 \times 10^{-20}$  |
| MW1323                                                        | n.a.         | hypothetical protein; similar to cell wall enzyme EbsB                       | 2.3           | $7.3 \times 10^{-10}$  |
| <b>sam00650 Butanoate Metabolism</b>                          |              |                                                                              |               |                        |
| Gene                                                          | Symbol       | Function                                                                     | Fold $\Delta$ | P-value                |
| MW0100                                                        | <i>butA</i>  | acetoin reductase                                                            | - 3.0         | $1.5 \times 10^{-30}$  |
| MW1979                                                        | n.a.         | hypothetical protein; similar to acetolactate synthase small subunit         | 2.7           | $5.7 \times 10^{-4}$   |
| <b>sam00640 Propanoate Metabolism</b>                         |              |                                                                              |               |                        |
| Gene                                                          | Symbol       | Function                                                                     | Fold $\Delta$ | P-value                |
| MW1468                                                        | <i>bmfBB</i> | branched-chain alpha-keto acid dehydrogenase E2                              | - 2.5         | $1.8 \times 10^{-21}$  |
| MW1557                                                        | n.a.         | hypothetical protein; similar to acetyl-CoA carboxylase, accB homologue      | 2.1           | $5.9 \times 10^{-8}$   |
| <b>sam00190 Oxidative Phosphorylation</b>                     |              |                                                                              |               |                        |
| Gene                                                          | Symbol       | Function                                                                     | Fold $\Delta$ | P-value                |
| MW0943                                                        | <i>qoxB</i>  | Quinol oxidase polypeptide I QoxB                                            | - 2.1         | $3.9 \times 10^{-16}$  |
| MW0944                                                        | n.a.         | hypothetical protein; similar to quinol oxidase polypeptide II QoxA          | - 2.2         | $4.4 \times 10^{-23}$  |
| <b>sam00300 Lysine Biosynthesis</b>                           |              |                                                                              |               |                        |
| Gene                                                          | Symbol       | Function                                                                     | Fold $\Delta$ | P-value                |
| MW0096                                                        | <i>sbmH</i>  | putative diaminopimelate decarboxylase                                       | 6.2           | $4.1 \times 10^{-102}$ |
| MW1214                                                        | n.a.         | aspartate kinase homologue                                                   | 2.8           | $6.0 \times 10^{-48}$  |
| <b>sam00330 Arginine &amp; Proline Metabolism</b>             |              |                                                                              |               |                        |
| Gene                                                          | Symbol       | Function                                                                     | Fold $\Delta$ | P-value                |
| MW1707                                                        | n.a.         | proline dehydrogenase homologue                                              | 2.2           | $6.0 \times 10^{-25}$  |
| MW2475                                                        | <i>rocA</i>  | 1-pyrroline-5-carboxylate dehydrogenase                                      | 2.1           | $5.0 \times 10^{-19}$  |
| <b>sam00053 Ascorbate &amp; Aldarate Metabolism</b>           |              |                                                                              |               |                        |
| Gene                                                          | Symbol       | Function                                                                     | Fold $\Delta$ | P-value                |
| MW0306                                                        | n.a.         | hypothetical protein; similar to transport protein SgaT                      | 2.4           | $9.8 \times 10^{-32}$  |
| MW0308                                                        | n.a.         | hypothetical protein; similar to PTS fructose-specific enzyme IIBC component | 2.1           | $4.6 \times 10^{-11}$  |
| <b>sam03010 Ribosome</b>                                      |              |                                                                              |               |                        |
| Gene                                                          | Symbol       | Function                                                                     | Fold $\Delta$ | P-value                |
| MW0015                                                        | <i>rplI</i>  | 50S ribosomal protein L9                                                     | - 2.3         | $9.4 \times 10^{-27}$  |
| MW1107                                                        | <i>rpmB</i>  | 50S ribosomal protein L28                                                    | - 2.0         | $8.4 \times 10^{-17}$  |
| <b>sam00630 Glyoxylate &amp; Dicarboxylate Metabolism</b>     |              |                                                                              |               |                        |
| Gene                                                          | Symbol       | Function                                                                     | Fold $\Delta$ | P-value                |
| MW0151                                                        | <i>fdh</i>   | NAD-dependent formate dehydrogenase                                          | 2.5           | $1.4 \times 10^{-22}$  |
| <b>sam00790 Folate Biosynthesis</b>                           |              |                                                                              |               |                        |
| Gene                                                          | Symbol       | Function                                                                     | Fold $\Delta$ | P-value                |
| MW2191                                                        | <i>moeA</i>  | molybdopterin biosynthesis protein moeA                                      | - 2.1         | $9.1 \times 10^{-21}$  |
| <b>sam00052 Galactose Metabolism</b>                          |              |                                                                              |               |                        |
| Gene                                                          | Symbol       | Function                                                                     | Fold $\Delta$ | P-value                |
| MW1642                                                        | <i>pfk</i>   | 6-phosphofructokinase                                                        | - 2.4         | $3.7 \times 10^{-30}$  |
| <b>sam00970 Aminoacyl-tRNA Biosynthesis</b>                   |              |                                                                              |               |                        |
| Gene                                                          | Symbol       | Function                                                                     | Fold $\Delta$ | P-value                |

|                                                                       |               |                                                                         |               |                         |
|-----------------------------------------------------------------------|---------------|-------------------------------------------------------------------------|---------------|-------------------------|
| MW1626                                                                | <i>thrS</i>   | threonyl-tRNA synthetase 1                                              | - 2.2         | 1.1 x 10 <sup>-20</sup> |
| <b>sam00622 Xylene Degradation</b>                                    |               |                                                                         |               |                         |
| <b>Gene</b>                                                           | <b>Symbol</b> | <b>Function</b>                                                         | <b>Fold Δ</b> | <b>P-value</b>          |
| MW1250                                                                | n.a.          | 4-oxalocrotonate tautomerase                                            | - 2.4         | 3.3 x 10 <sup>-21</sup> |
| <b>sam00261 Monobactam Biosynthesis</b>                               |               |                                                                         |               |                         |
| <b>Gene</b>                                                           | <b>Symbol</b> | <b>Function</b>                                                         | <b>Fold Δ</b> | <b>P-value</b>          |
| MW1214                                                                | n.a.          | aspartate kinase homologue                                              | 2.8           | 6.0 x 10 <sup>-48</sup> |
| <b>sam01220 Degradation of Aromatic Compounds</b>                     |               |                                                                         |               |                         |
| <b>Gene</b>                                                           | <b>Symbol</b> | <b>Function</b>                                                         | <b>Fold Δ</b> | <b>P-value</b>          |
| MW1250                                                                | n.a.          | 4-oxalocrotonate tautomerase                                            | - 2.4         | 3.3 x 10 <sup>-21</sup> |
| <b>sam00280 Valine, Leucine &amp; Isoleucine Degradation</b>          |               |                                                                         |               |                         |
| <b>Gene</b>                                                           | <b>Symbol</b> | <b>Function</b>                                                         | <b>Fold Δ</b> | <b>P-value</b>          |
| MW1468                                                                | <i>bmfBB</i>  | branched-chain alpha-keto acid dehydrogenase E2                         | - 2.5         | 1.8 x 10 <sup>-21</sup> |
| <b>sam00362 Benzoate Degradation</b>                                  |               |                                                                         |               |                         |
| <b>Gene</b>                                                           | <b>Symbol</b> | <b>Function</b>                                                         | <b>Fold Δ</b> | <b>P-value</b>          |
| MW1250                                                                | n.a.          | 4-oxalocrotonate tautomerase                                            | - 2.4         | 3.3 x 10 <sup>-21</sup> |
| <b>sam00270 Cysteine &amp; Methionine Metabolism</b>                  |               |                                                                         |               |                         |
| <b>Gene</b>                                                           | <b>Symbol</b> | <b>Function</b>                                                         | <b>Fold Δ</b> | <b>P-value</b>          |
| MW1214                                                                | n.a.          | aspartate kinase homologue                                              | 2.8           | 6.0 x 10 <sup>-48</sup> |
| <b>sam00061 Fatty Acid Biosynthesis</b>                               |               |                                                                         |               |                         |
| <b>Gene</b>                                                           | <b>Symbol</b> | <b>Function</b>                                                         | <b>Fold Δ</b> | <b>P-value</b>          |
| MW1557                                                                | n.a.          | hypothetical protein; similar to acetyl-CoA carboxylase, accB homologue | 2.1           | 5.9 x 10 <sup>-8</sup>  |
| <b>sam01212 Fatty Acid Metabolism</b>                                 |               |                                                                         |               |                         |
| <b>Gene</b>                                                           | <b>Symbol</b> | <b>Function</b>                                                         | <b>Fold Δ</b> | <b>P-value</b>          |
| MW1557                                                                | n.a.          | hypothetical protein; similar to acetyl-CoA carboxylase, accB homologue | 2.1           | 5.9 x 10 <sup>-8</sup>  |
| <b>sam00400 Phenylalanine, Tyrosine &amp; Tryptophan Biosynthesis</b> |               |                                                                         |               |                         |
| <b>Gene</b>                                                           | <b>Symbol</b> | <b>Function</b>                                                         | <b>Fold Δ</b> | <b>P-value</b>          |
| MW1680                                                                | n.a.          | chorismate mutase homologue                                             | - 2.4         | 7.9 x 10 <sup>-23</sup> |
| <b>sam03018 RNA Degradation</b>                                       |               |                                                                         |               |                         |
| <b>Gene</b>                                                           | <b>Symbol</b> | <b>Function</b>                                                         | <b>Fold Δ</b> | <b>P-value</b>          |
| MW1642                                                                | <i>pfk</i>    | 6-phosphofructokinase                                                   | - 2.4         | 3.7 x 10 <sup>-30</sup> |

**Note:** KEGG Mapper-Search Pathway Data obtained from the following link: [https://www.genome.jp/kegg/tool/map\\_pathway1.html](https://www.genome.jp/kegg/tool/map_pathway1.html).

## **4.) Biological Methods.**

### **a.) Total RNA Extraction of Treated and Untreated MRSA-1707 (*S. aureus* MW2) Biofilms:**

**Biofilm Formation:** MRSA BAA-1707 (MRSA-1707, or *S. aureus* MW2) was grown in fresh tryptic soy broth with 0.5 % glucose (TSBG) to an optical density (OD<sub>600</sub> ~ 0.8 - 1.0). Then 1 mL of this culture was added to 24-well plate coated with 0.1% gelatin. The plate was then incubated for 20 hours at 37 °C under static conditions to form biofilms. Following biofilm formation, the contents of the well was discarded leaving only the biofilm at the bottom.

**Treating Established Biofilms with HP-14:** HP-14 was added to the established MRSA-1707 biofilm in TSBG at the desired concentration (0.625 µM, 1/10 MBEC value). In addition, the same volume of DMSO (vehicle) was added as a negative control. The plate was then incubated under static conditions for 20 hours at 37 °C. After the incubation period, the liquid culture was discarded leaving only the surface-attached biofilm.

**Extraction of Total RNA from MRSA-1707 Biofilms:** 0.5 mL of RNAprotect Bacteria Reagent (Qiagen) was added for 5 minutes to the plate then the biofilm suspension was scraped and transferred into 2 mL tubes. The bacterial cells were then centrifuged for 1 minute at 15,000 xg, then the supernatant was removed. Total RNA was extracted using the RiboPure RNA Purification Kit, Bacteria (Invitrogen, cat# AM1925) according to the manufacturer's protocols. Genomic DNA was digested using the materials supplied by the kit. Each experiment was performed in three replicates. Note: TPEN and EDTA treated biofilms followed the same protocol.

**RiboPure RNA Purification kit, Bacteria protocol as provided by the manufacturer (<https://www.thermofisher.com/order/catalog/product/AM1925>):**

1. For each sample, pour ~ 250 µL of ice-cold Zirconia Beads into a 0.5 mL screw cap tube.
2. Add 350 µL RNAwiz to the cell pellet and re-suspend by vortexing vigorously for 10 to 15 seconds.
3. Transfer the cells in RNAwiz to a tube containing 250 µL Zirconia Beads and securely fasten the lid.
4. Vortex the tubes for 10 minutes then centrifuge for 5 min at 4 °C.
5. Transfer the bacterial lysate to a fresh 1.5 mL tube and discard the Zirconia Beads. Estimate the lysate volume while transferring the lysate (note: typically 200 to 250 µL of lysate is recovered at this step).
6. Add 0.2 volumes chloroform to the lysate.
7. Shake vigorously for 30 seconds, then incubate 10 minutes at room temperature. Adding chloroform and incubating at room temperature will allow the aqueous and organic phases to be separated by centrifugation.
8. Centrifuge for 5 minutes at 4 °C.
9. Transfer the aqueous phase (top), containing the partially purified RNA, to a fresh 1.5 mL Tube. Estimate the lysate volume while transferring the lysate (note: typically 200 to 250 µL of aqueous phase is recovered at this step).
10. Add 0.5 volumes of 100% ethanol to the aqueous phase recovered and mix thoroughly.
11. Transfer the sample to the Filter Cartridge, close the lid, and centrifuge for ~1 minute, or until all the liquid is through the filter.
12. Discard the flow-through and return the Filter Cartridge to the same Collection Tube.
13. Wash the filter by adding 700 µL Wash Solution 1 to the Filter Cartridge, and centrifuge for ~ 1 minute or until all of the liquid is through the filter.
14. Discard the flow-through and return the Filter Cartridge to the same Collection Tube.
15. Wash the filter by adding 500 µL Wash Solution 2/3 to the Filter Cartridge and centrifuge for ~1 minute, or until all of the liquid is through the filter.
16. Discard the flow-through and return the Filter Cartridge to the same Collection Tube.
17. Repeat with a second 500 µL aliquot of Wash Solution 2/3.

18. Spin the Filter Cartridge for 1 minute to remove excess wash.
19. Transfer the Filter Cartridge to a fresh 2 mL Collection Tube.
20. Elute RNA by applying 25 to 50  $\mu$ L Elution Solution, preheated to 95 to 100  $^{\circ}$ C, to the center of the filter.
21. Centrifuge for 1 minute.
22. Repeating the elution step with a second 25 to 50  $\mu$ L aliquot of preheated Elution Solution will maximize total RNA yields.
23. DNase treatment: Add 10X DNase buffer equal to 1/9 volume of the RNA and add 4  $\mu$ L of DNase 1 (2 U/ $\mu$ L)
24. Incubate 30 minutes at 37  $^{\circ}$ C so that the DNase 1 can digest the genomic DNA.
25. Add a volume of DNase Inactivation Reagent equal to 20% of the volume of RNA treated to each sample. For example, if 100  $\mu$ L of RNA is treated with DNase, then add 20  $\mu$ L of DNase Inactivation Reagent.
26. Vortex the tube of RNA after adding the DNase Inactivation Reagent to mix well.
27. Store at room temperature for 2 minutes flicking the tube once or twice during this period to re-suspend the DNase Inactivation Reagent.
28. Centrifuge the sample for  $\sim$ 1 minute at maximum speed to pellet the DNase Inactivation Reagent, then transfer the RNA solution to a new RNase-free tube (not supplied with the kit).

## b.) RNA Quality Control Information:

RNA concentration was determined on Qubit<sup>®</sup> 2.0 Fluorometer (ThermoFisher/Invitrogen, Grand Island, NY), RNA quality was assessed using the Agilent 2100 Bioanalyzer (Agilent Technologies, Inc.). Total RNA with RNA integrity numbers (RIN)  $\geq$  7 were used for RNA-seq library construction.

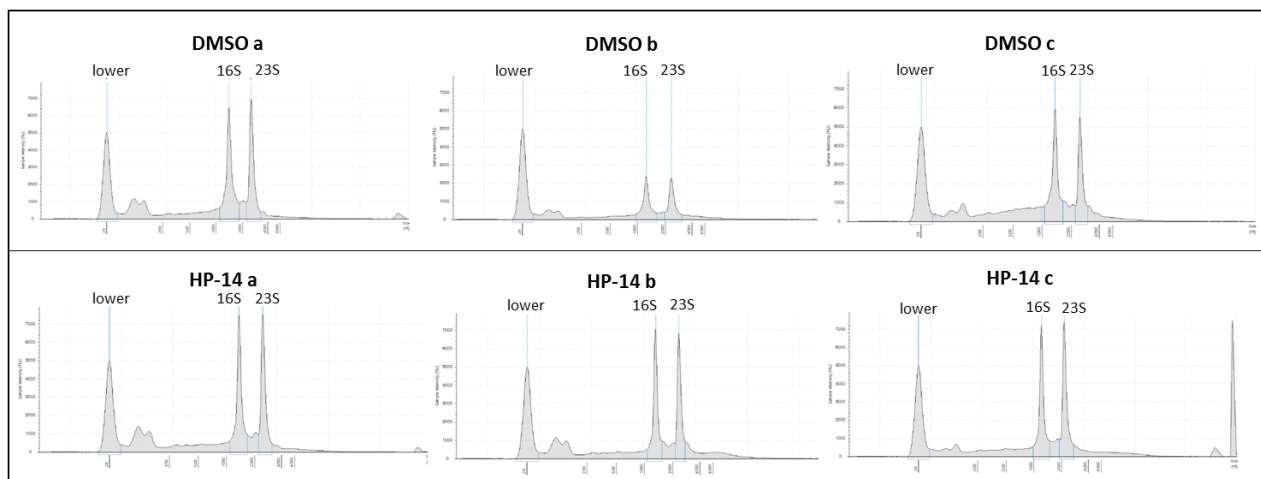

### Gel Image

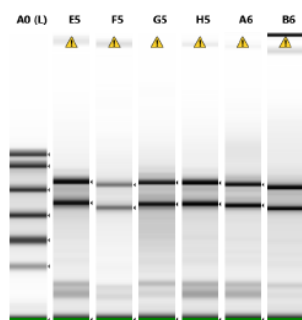

| RIN <sup>e</sup> |
|------------------|------------------|------------------|------------------|------------------|------------------|
| 8.6              | 8.3              | 7.8              | 8.9              | 9.0              | 8.9              |

| Sample    | 23S/16S | [ng / $\mu$ L] | RIN |
|-----------|---------|----------------|-----|
| DMSO (a)  | 0.8     | 77.5           | 8.6 |
| DMSO (b)  | 0.9     | 37.1           | 8.3 |
| DMSO (c)  | 0.7     | 70.9           | 7.8 |
| HP-14 (a) | 0.9     | 76.3           | 8.9 |
| HP-14 (b) | 0.9     | 70.3           | 9.0 |
| HP-14 (c) | 1.0     | 83.0           | 8.9 |



### **c.) RNA-seq Library Preparation:**

rRNAs were removed by starting with 2000 ng of total RNA (Illumina Ribo-Zero Magnetic Kit for bacteria following the manufacturer's protocol). The depleted RNA were then used for library construction with NEBNext Ultra RNA Library Prep Kit for Illumina (New England Biolabs, catalog # E7530) according to the manufacturer's user guide. Briefly, 8  $\mu$ l of rRNA removal solution was used for 2000 ng of total RNA for ribosomal removal. 5  $\mu$ L of purified ribosomal removal product was fragmented using the first strand synthesis reaction buffer mix by heating at 94 °C for 8 minutes. This was then followed by first strand cDNA synthesis using reverse transcriptase and random primers. Synthesis of ds cDNA was done using the second strand master mix provided in the kit. The resulting double-stranded cDNA was end-repaired, dA-tailing and ligated with NEBNext adaptors. Finally, the library was enriched by PCR amplification, and purified by Agencourt AMPure beads (Beckman Coulter, catalog # A63881).

### **d.) Library QC and Pooling:**

Barcoded libraries were sized on the bioanalyzer, quantitated by QUBIT. Typically, a 200-1000 broad library peak is observed. Quantitative PCR is used to validate the library's functionality, using the KAPA library quantification kit (Kapa Biosystems, catalog number: KK4824). Six individual samples were pooled equimolarly for one lane of HiSeq 3000 2X100 cycles run. RNA library construction was performed at the Interdisciplinary Center for Biotechnology Research (ICBR), Gene Expression & Genotyping Core, University of Florida (UF).

### **e.) Illumina HiSeq 3000 Sequencing Run:**

Sequencing was performed on the Illumina HiSeq3000 instrument using the clustering and sequencing reagents provided by Illumina. Paired-end, 2 x 100 cycles runs required the adding together of reagents from the 150 cycles and the 50 cycles kits (Cat# FC-410-1002, FC-410-1001, and PE-410-1001). Sequencing reactions were set up using 5  $\mu$ L of library (2.5 nM). Libraries were first denatured with 5  $\mu$ l 0.1 N sodium hydroxide for 8 minutes at room temperature. This was followed by neutralization with 5  $\mu$ l of 200 mM Tris (pH 7.5), and mixing with 35  $\mu$ L of the ExAmp reagents (contained in the PE-410-1001 clustering kit) according to the manufacturer's protocol. Samples were clustered in the cBot clustering station using the "HiSeq 3000/4000 HD Exclusion Amp v1.0" protocol. Runs were set by choosing the 'Generate FASTQ only' workflow in the HiSeq Control Software v 3.3.76 in the computer station that runs the HiSeq3000 sequencing machine (Illumina, USA). Under these run conditions, the cluster pass-filter was 70-75%, with a yield of 300-325 million pass-filter reads per lane. The %  $\geq$  Q30 score was typically above 95%. RNA-seq projects that consisted of large number of samples were done by adding unique barcodes (single- or dual-indexed) to each sample, followed by generating a single pool for sequencing in as many lanes as necessary for a yield of ~ 50 million reads per sample. The reads that passed Illumina quality control filtering were used as raw data for further bioinformatics analysis.

### **f.) RNA-Seq Data Analysis:**

The quality of the RNA-Seq sequence data was first evaluated using FastQC<sup>1</sup> prior to further downstream analysis. Low quality sequences were removed and poor quality part of the reads were trimmed using Trimmomatic<sup>2</sup>. The Star Aligner<sup>3</sup> was used to map high quality paired-end reads to NC\_003923.1<sup>4</sup> genome. Gene expression was obtained using RSEM<sup>5</sup>. The expected read counts and Fragments Per Kilobase of transcript per Million mapped reads (FPKM), were extracted for further analysis. The estimated read counts were taken as input for edgeR<sup>6</sup> to perform DE analysis using exact test. The thresholds for calling significantly differential expressed genes were set at FDR 0.01, the fold change of greater than 2, and the average FPKM for at least one of each comparison group is higher than 0.

### g.) Quantitative Real-Time PCR (qPCR) for Select Gene Transcripts (Validation):

Total RNA was isolated from MRSA-1707 biofilms treated and untreated with **HP-14** (see RNA extraction methods for details). Real-time PCR reactions were performed using the Power SYBR Green RNA-to-C<sub>T</sub> 1-Step Kit (Applied Biosystems cat# 4389986) using the manufacturer's guidelines. The materials in the table below were added to a 1.5 mL Eppendorf tube on ice.

| Material              | Amount / Reaction (20 $\mu$ L) | Triplicate + Excess (70 $\mu$ L) |
|-----------------------|--------------------------------|----------------------------------|
| SYBR                  | 10 $\mu$ L                     | 35 $\mu$ L                       |
| Primer (5 nM)_forward | 1.5 $\mu$ L                    | 5.25 $\mu$ L                     |
| Primer (5 nM)_reverse | 1.5 $\mu$ L                    | 5.25 $\mu$ L                     |
| Rt enzyme             | 0.16 $\mu$ L                   | 0.56 $\mu$ L                     |
| RNA                   | 30 ng                          | 105 ng                           |
| Water                 | 20 $\mu$ L                     | 70 $\mu$ L                       |

After all contents were added to Eppendorf tubes, they were mixed by centrifugation for 1 minute at 10,000  $\times g$ . 20  $\mu$ L were then removed from the reaction tubes and were added to each well of a MicroAmp Optical 96-Well Reaction Plate with Barcode (Applied Biosystems 4306737) on ice. The plate was then sealed with MicoAmp Optical Adhesive Film (Applied Biosystems 4311971). The plate was centrifuged for 2 minutes at 1200  $\times g$ . qPCR was carried out on an ABI 7300 sequence detection system using the thermocycler program: 30 minutes at 50  $^{\circ}$ C, 10 minutes at 95  $^{\circ}$ C, 15 seconds at 95  $^{\circ}$ C (40 cycles) and 1 minute at 60  $^{\circ}$ C. Relative gene expression changes were calculated using the  $\Delta\Delta$ CT method. For each experiment, the CT values of each gene tested were normalized to the CT values of the housekeeping gene *ptaA*. Graphs and data analysis were performed using the GraphPad Prism 6. All primers are listed in Supporting Table 5. All qPCR data were generated from three independent experiments.

**i.) Time Course Quality Control Data for 1, 4 and 8 Hour MRSA Biofilm Experiments:**

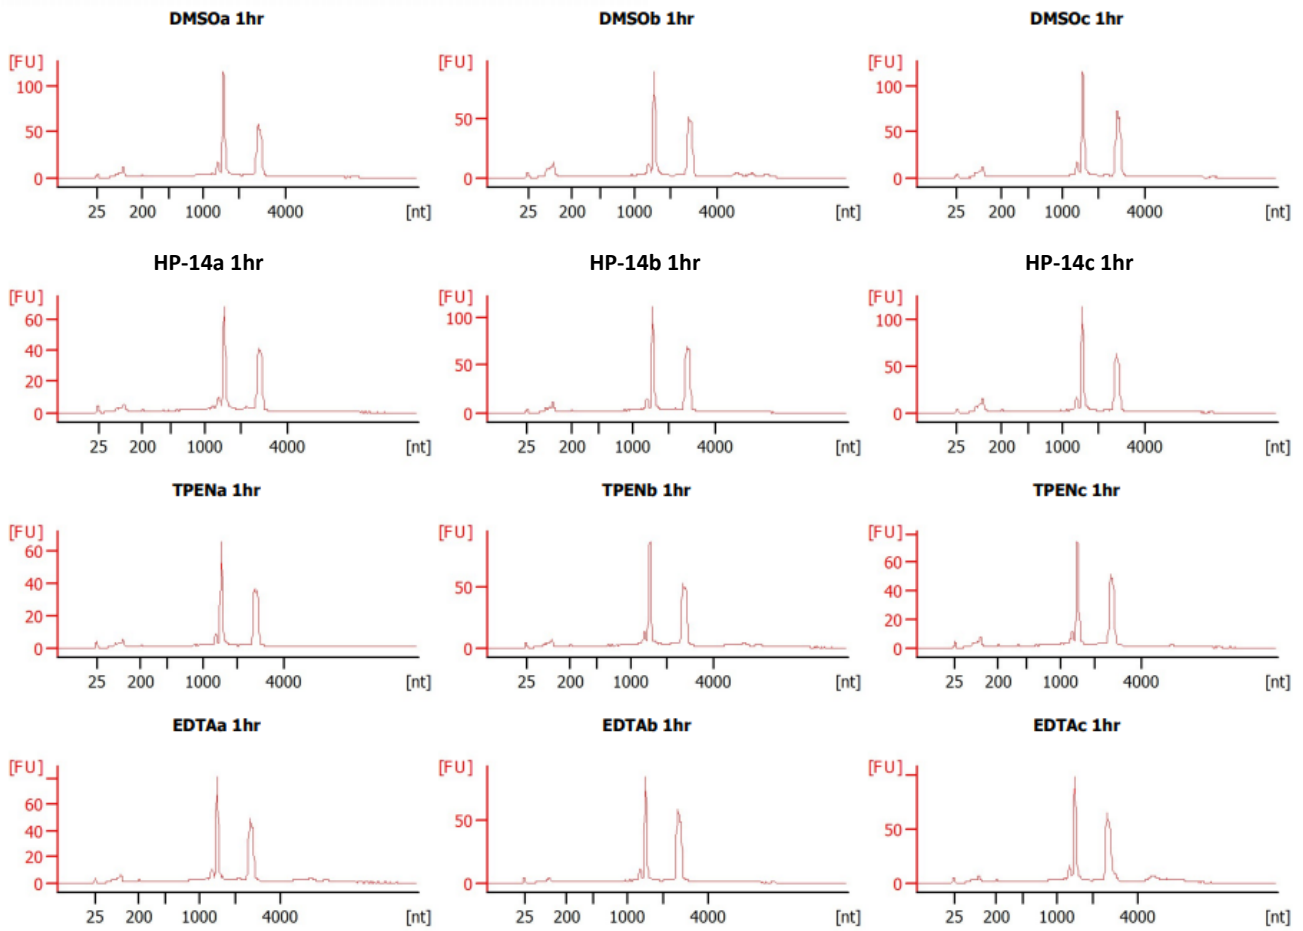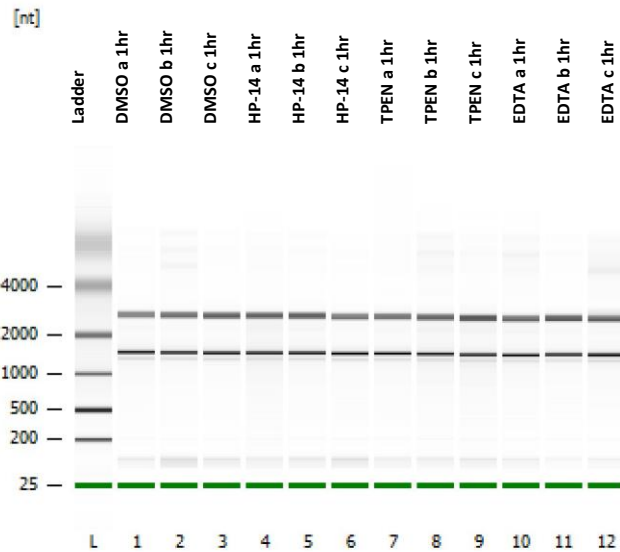

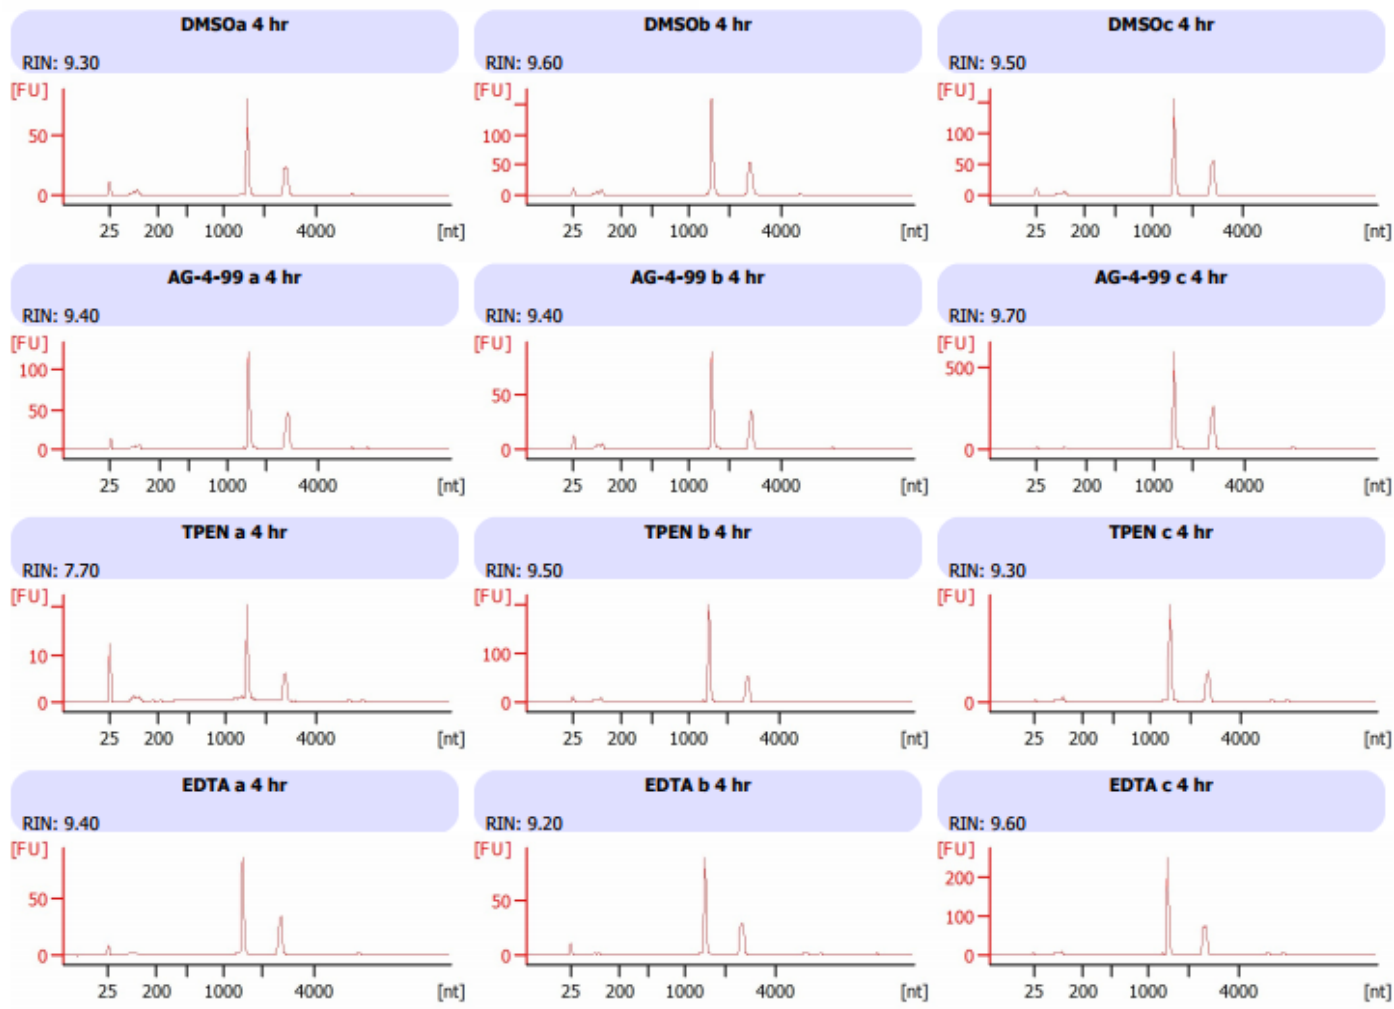

**Electrophoresis File Run Summary**

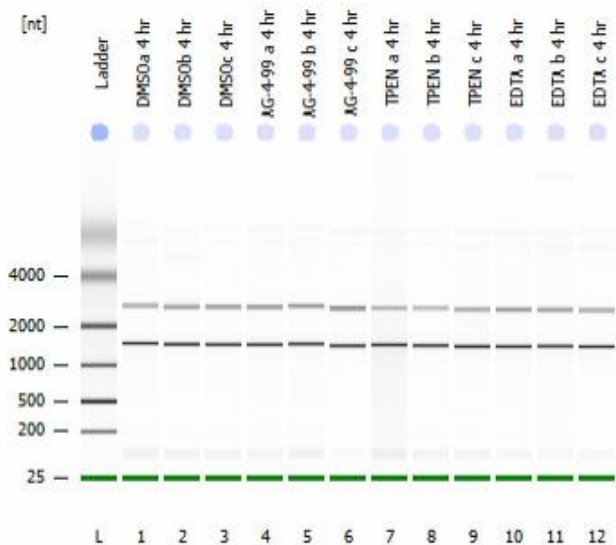

**Note: AG-4-99** in the above image is the notebook code for is compound **HP-14**.

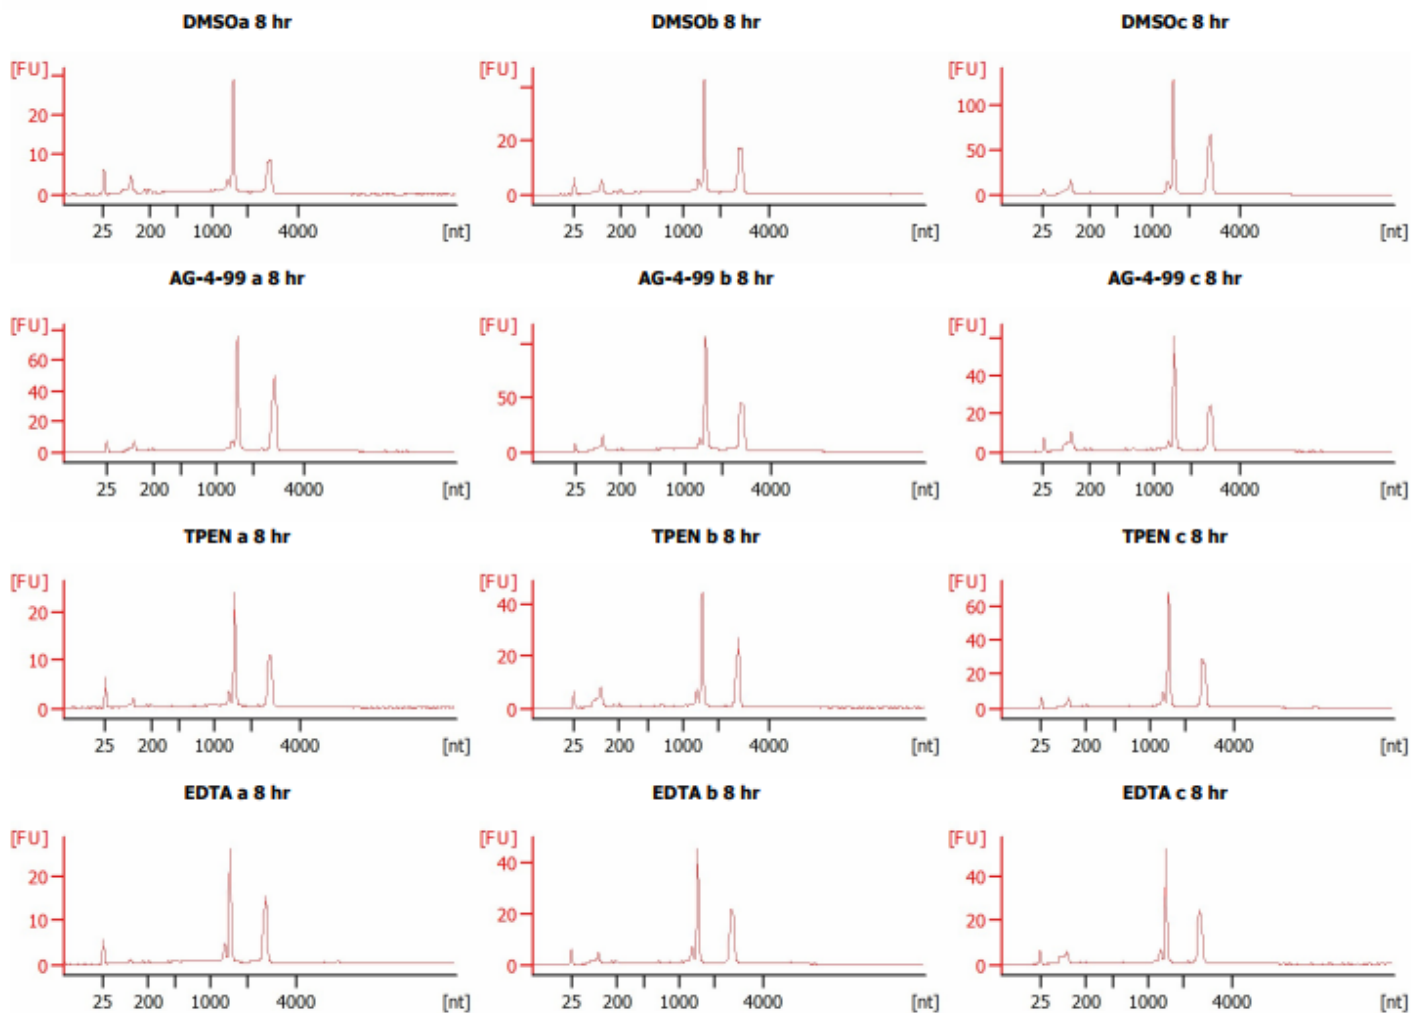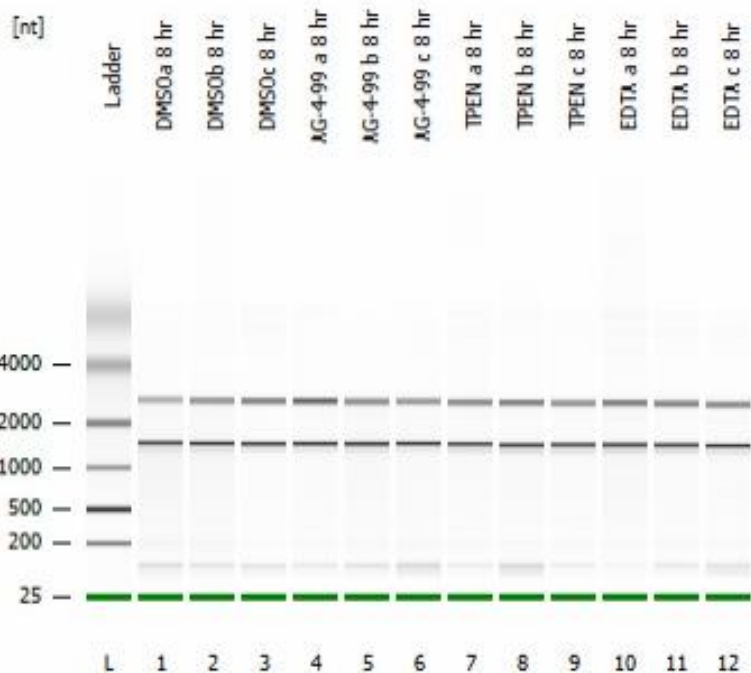

**Note:** AG-4-99 in the above image is the notebook code for is compound **HP-14**.

Summary of the RNA concentrations and the RIN (RNA Integrity Number) numbers obtained from the RNA samples (independent experiments) isolated from MRSA-1707 biofilms treated with **HP-14** at 0.625  $\mu$ M for 1, 4 and 8 hours.

| Sample    | 1-hr treatment |     | 4-hr treatment |     | 8-hr treatment |     |
|-----------|----------------|-----|----------------|-----|----------------|-----|
|           | [ng / $\mu$ L] | RIN | [ng / $\mu$ L] | RIN | [ng / $\mu$ L] | RIN |
| DMSO (a)  | 512            | 8.6 | 111            | 9.3 | 97.1           | 7.3 |
| DMSO (b)  | 445            | 8.9 | 229            | 9.6 | 94             | 7.1 |
| DMSO (c)  | 530            | 9.1 | 213            | 9.5 | 241            | 9.1 |
| HP-14 (a) | 366            | 8.2 | 179            | 9.4 | 155            | 9.0 |
| HP-14 (b) | 534            | 8.9 | 124            | 9.4 | 232            | 8.2 |
| HP-14 (c) | 518            | 8.9 | 813            | 9.7 | 132            | 8.4 |
| TPEN (a)  | 286            | 8.8 | 39             | 7.7 | 46             | 8.5 |
| TPEN (b)  | 465            | 8.3 | 243            | 9.5 | 101            | 8.4 |
| TPEN (c)  | 403            | 8.4 | 526            | 9.3 | 125            | 8.4 |
| EDTA (a)  | 397            | 8.7 | 119            | 9.4 | 54             | 8.1 |
| EDTA (b)  | 374            | 9.2 | 125            | 9.2 | 92             | 8.4 |
| EDTA (c)  | 536            | 8.9 | 317            | 9.6 | 102            | 8.6 |

## **5.) References.**

- 1.) Babraham Bioinformatics. FASQC. <http://www.bioinformatics.babraham.ac.uk/projects/fastqc/>.
- 2.) Bolger, A. M., Lohse, M. & Usadel, B. Trimmomatic: a flexible trimmer for Illumina sequence data. *Bioinformatics (Oxford, England)* **30**, 2114-2120 (2014).
- 3.) Dobin, A. *et al.* STAR: ultrafast universal RNA-seq aligner. *Bioinformatics (Oxford, England)* **29**, 15-21 (2013).
- 4.) *Staphylococcus aureus* subsp. *aureus* MW2 DNA, complete genome. [https://www.ncbi.nlm.nih.gov/nuccore/NC\\_003923](https://www.ncbi.nlm.nih.gov/nuccore/NC_003923).
- 5.) Li, B. & Dewey, C. N. RSEM: accurate transcript quantification from RNA-Seq data with or without a reference genome. *BMC Bioinformatics* **12**, 323 (2011).
- 6.) Robinson, M. D., McCarthy, D. J. & Smyth, G. K. edgeR: a Bioconductor package for differential expression analysis of digital gene expression data. *Bioinformatics (Oxford, England)* **26**, 139-140 (2010).
